# Supplementary material
Source: PubMed Central journal article supplement (PMC3257364)

# Completely $N^1$ -Selective Palladium-Catalyzed Arylation of Unsymmetric Imidazoles: Application to the Synthesis of Nilotinib

Satoshi Ueda, Mingjuan Su and Stephen L. Buchwald\*

Department of Chemistry, Massachusetts Institute of Technology,  
77 Massachusetts Avenue, Cambridge, Massachusetts 02139

## Supporting Information

### Complete Author Lists for Ref 1a

Kantarjian, H.; Giles, F.; Wunderle, L.; Bhalla, K.; O'Brien, S.; Wassmann, B.; Tanaka, C.; Manley, P.; Rae, P.; Mietlowski, W.; Bochinski, K.; Hochhaus, A.; Griffin, J. D.; Hoelzer, D.; Albitar, M.; Dugan, M.; Cortes, J.; Alland, L.; Ottmann, O. G.

### Complete Author Lists for Ref 20d

Lee, C. S.; Lee, T. H.; Yoon, S. K.; Choi, J. S.; Jang, Y. J.; Kim, S. W.; Chang, H. K.; Park, M. J.; Kim, T. H.; Ahn, Y. H.; Park, H. D.; Park, H. J.; Lim, D. C.; Lee, J. Y.; Lee, S. H.; Park, W. S.; Oh, Y. S.

### General Procedures

All reactions were carried out under an argon atmosphere. Toluene and THF were purchased from J.T. Baker in a CYCLE-TAINER solvent-deliver keg and vigorously purged with argon for 1 hour. The solvent was further purified by passing through successive alumina and Q5 reactant-packed columns on a solvent purification system. The 1,4-dioxane and *t*-BuOH were purchased from Aldrich Chemical Co. in Sure-Seal bottles and were used as received.  $Pd_2(dba)_3$  was purchased from Strem Chemicals Inc. and aryl halides and imidazoles were purchased from Aldrich Chemical Co., Alfa Aesar, TCI America or Matrix Scientific and were used without further purification. Anhydrous tribasic potassium phosphate was purchased from Alfa Aesar and potassium *tert*-butoxide were purchased from Aldrich Chemical Co. and stored in a glovebox. Small portions were removed and stored in a desiccator for up to 2 weeks (All reactions were set-up outside of the glovebox). **L1**<sup>1</sup> and **L3** precatalyst<sup>2</sup> were prepared by literature procedures.

Reactions were monitored by GC and thin-layer chromatography (TLC) carried out on 0.25 mm E. Merck silica gel plates (60F-254) using UV light. Flash silica gel chromatography was performed using Silicycle SiliFlashP60 (230-400 mesh) silica gel. All compounds were characterized by <sup>1</sup>H NMR, <sup>13</sup>C NMR and IR spectroscopy. Copies of the <sup>1</sup>H and <sup>13</sup>C NMR spectra can be found at the end of the Supporting Information. Nuclear Magnetic Resonance spectra were recorded on a Bruker 400 MHz instrument. All <sup>1</sup>H NMR experiments are reported in  $\delta$  units, parts per million (ppm), and were measured relative to the signals for residual chloroform (7.26 ppm) or dimethylsulfoxide-*d*<sub>6</sub> (2.50 ppm) in the deuterated solvent, unless otherwise stated. All <sup>13</sup>C NMR spectra are reported in ppm relative to deuteriochloroform (77.23 ppm) or dimethylsulfoxide-*d*<sub>6</sub> (39.52 ppm), unless otherwise stated, and all were obtained with <sup>1</sup>H decoupling. All IR spectra were taken on a Perkin – Elmer 2000 FTIR. All GC analyses were performed on a Agilent 6890 gas chromatograph with an FID detector using a J & W DB-1 column (10 m, 0.1 mm I.D.). Elemental analyses were performed by Atlantic Microlabs Inc., Norcross, GA. ESI-MS spectra were recorded on a Bruker Daltonics APEXIV 4.7 Tesla Fourier Transform Ion Cyclotron Resonance Mass Spectrometer (FT-ICR-MS). The pure compounds are estimated to be  $\geq 95\%$  pure as determined by <sup>1</sup>H NMR and GC analysis

### <sup>31</sup>P NMR experiments (Figure 3)

*Figure 3 (a)* An oven-dried vial was equipped with a magnetic stir bar and charged with  $Pd_2(dba)_3$  (6.9 mg, 0.0075 mmol), **L1** (8.6 mg, 0.018 mol) and 4-methylimidazole (20 mg, 0.24 mmol). The vial was sealed with a screw-cap septum, and then evacuated and backfilled with argon (this process was repeated a total

of 3 times). Anhydrous toluene (0.8 mL) was added via syringe. The resulting dark purple mixture was stirred at 120 °C for 3 min, at this point the color of the mixture turned to light green and Pd-black precipitate was observed. After cooling to room temperature the mixture was transferred to an Ar-filled septum-sealed NMR tube via syringe and  $^{31}\text{P}$  NMR spectrum was recorded.

**Figure 3 (b)** An oven-dried vial was equipped with a magnetic stir bar and charged with  $\text{Pd}_2(\text{dba})_3$  (6.9 mg, 0.0075 mmol) and **L1** (8.6 mg, 0.018 mol). The vial was sealed with a screw-cap septum, and then evacuated and backfilled with argon (this process was repeated a total of 3 times). Anhydrous toluene (0.8 mL) was added via syringe. The resulting dark purple mixture was stirred at 120 °C for 3 min, at this point the color of the mixture turned to red-brown. After cooling to room temperature the mixture was transferred to an Ar-filled septum-sealed NMR tube via syringe and  $^{31}\text{P}$  NMR spectrum was recorded.

#### ESI-MS spectrum of the crude premixing solution (Figure 3, (b))

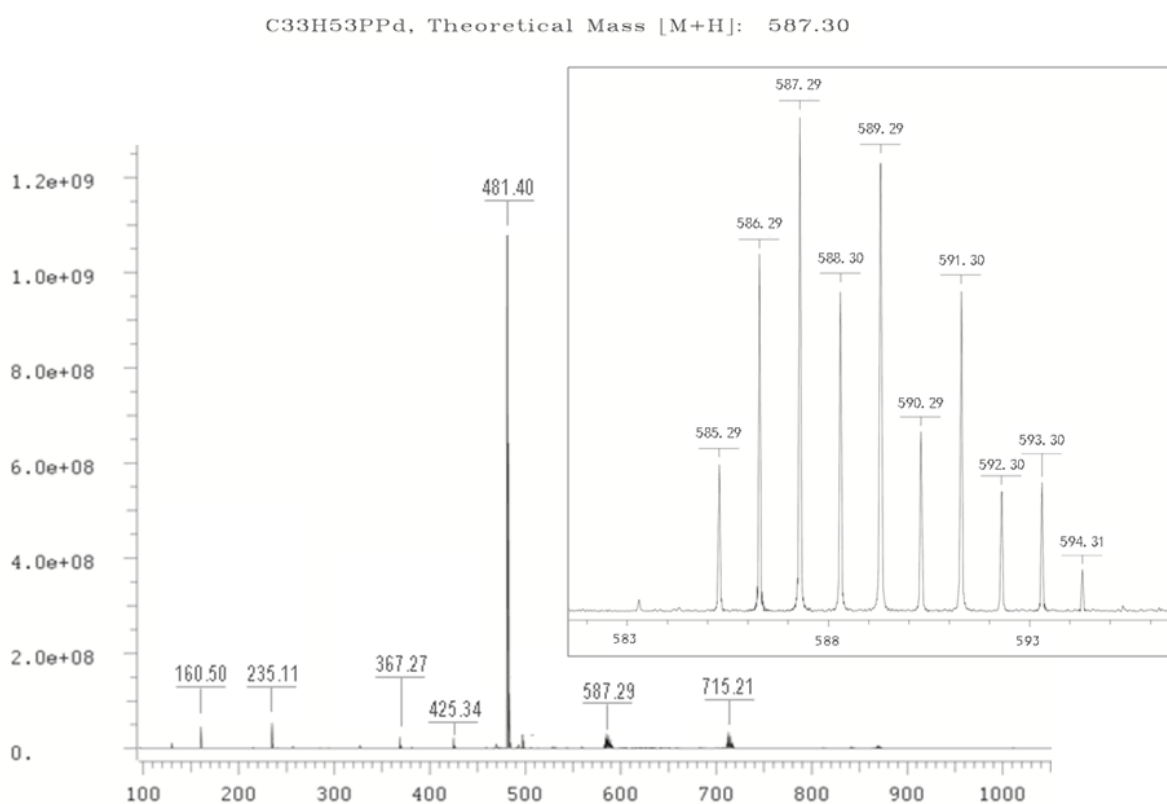

#### 4-Methylbenzimidazole

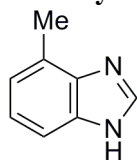

A mixture of 2,3-diaminotoluene (2.44 g, 20 mmol), 95% formic acid (3.18 mL, 80 mmol) and  $\text{H}_2\text{O}$  (12 mL) was stirred at 100 °C for 16 h in a sealed tube. After cooling to room temperature, the mixture was diluted with EtOAc and the organic phase was washed 3 times with sat. aq.  $\text{NaHCO}_3$ , dried over  $\text{MgSO}_4$  and concentrated in vacuo. The crude product was purified via flash chromatography (EtOAc/MeOH, 40:1) to provide the title compound as a light brown solid (2.41 g, 90%), mp 139 °C.  $^1\text{H}$  NMR (400 MHz,

Acetone-*d*<sub>6</sub>)  $\delta$  11.32 (br, 1H), 8.24 (s, 1H), 7.46 (d, *J* = 8.0 Hz, 1H), 7.13 (t, *J* = 7.6 Hz, 1H), 7.03 (d, *J* = 7.2 Hz, 1H), 2.59 (s, 3H); <sup>13</sup>C NMR (100 MHz, CDCl<sub>3</sub>)  $\delta$  141.7, 126.5, 123.0, 113.2, 17.1 (Signals for C4 and bridgehead carbons were too weak to observed due to the tautomeric nature of the title compound); IR (film)  $\nu_{\text{max}}$  2810, 1762, 1601, 1487, 1449, 1295, 1249, 1167, 946, 881, 746, 634 cm<sup>-1</sup>; Anal. Calcd. For C<sub>8</sub>H<sub>8</sub>N<sub>2</sub>: C, 72.70; H, 6.10. Found: C, 72.33; H, 6.05.

#### 4-Propoxybenzimidazole

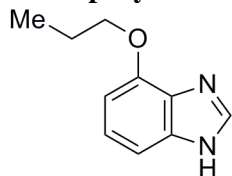

A mixture of 3-propoxybenzene-1,2-diamine<sup>3</sup> (3.0 g, 18 mmol), 95% formic acid (2.86 mL, 72 mmol) and H<sub>2</sub>O (10 mL) was stirred at 100 °C for 16 h in a sealed tube. After cooling to room temperature, the mixture was diluted with EtOAc and the organic phase was washed 3 times with sat. aq. NaHCO<sub>3</sub>, dried over MgSO<sub>4</sub> and concentrated in vacuo. The crude product was purified via flash chromatography (EtOAc/MeOH, 30:1) to provide the title compound as a light brown solid (2.53 g, 80%), mp 160-161 °C. <sup>1</sup>H NMR (400 MHz, DMSO-*d*<sub>6</sub>)  $\delta$  12.66 (br, 1H), 8.11 (s, 1H), 7.16 (br, 1H), 7.07 (t, *J* = 7.6 Hz, 1H), 6.69 (br, 1H), 4.20-4.02 (m, 2H), 1.90-1.64 (m, 2H), 1.01 (t, *J* = 7.6 Hz, 3H); <sup>13</sup>C NMR (100 MHz, DMSO-*d*<sub>6</sub>)  $\delta$  140.7, 122.7, 108.0, 104.0, 69.6, 22.3, 10.5 (Signals for C4 and bridgehead carbons were too weak to observed due to the tautomeric nature of the title compound); IR (film)  $\nu_{\text{max}}$  1597, 1450, 1308, 1252, 1093, 985, 954, 848, 723 cm<sup>-1</sup>; Anal. Calcd. For C<sub>10</sub>H<sub>12</sub>N<sub>2</sub>O: C, 68.16; H, 6.86. Found: C, 68.20; H, 6.87.

#### General Procedure A: *N*-arylation of imidazoles (with >1.0 mol% Pd)

An oven-dried vial was equipped with a magnetic stir bar and charged with Pd<sub>2</sub>(dba)<sub>3</sub> (0.005-0.0125 mmol) and the **L1** (0.01-0.025 mmol). The vial was sealed with a screw-cap septum, and then evacuated and backfilled with argon (this process was repeated a total of 3 times). Anhydrous toluene (0.83 mL) and anhydrous 1,4-dioxane (0.17 mL) were added via syringe. The resulting dark purple mixture was stirred at 120 °C for 3 min, at this point the color of the mixture turned to red-brown. A second oven-dried vial, which was equipped with stir bar, was charged with imidazole derivative (1.1-1.2 mmol) and K<sub>3</sub>PO<sub>4</sub> (424 mg, 2.0 mmol) (aryl halides that were solid at room temperature were added at this point). The vial was sealed with a screw-cap septum, and then evacuated and backfilled with argon (this process was repeated a total of 3 times) and then aryl halide and the premixed catalyst solution were added by syringe to the second vial. The reaction mixture was heated at 120 °C for 5 h. The reaction was cooled to room temperature, diluted with EtOAc, washed with brine, dried over MgSO<sub>4</sub>, concentrated in vacuo and purified via flash chromatography.

#### General Procedure B: *N*-arylation of imidazoles (with 0.5 mol% Pd)

An oven-dried vial was equipped with a magnetic stir bar and charged with Pd<sub>2</sub>(dba)<sub>3</sub> (2.3 mg, 0.0025 mmol) and **L1** (2.4 mg, 0.005 mmol). The vial was sealed with a screw-cap septum, and then evacuated and backfilled with argon (this process was repeated a total of 3 times). Anhydrous toluene (0.3 mL) was added via syringe. The resulting dark purple mixture was stirred at 120 °C for 3 min, at this point the color of the mixture turned to red-brown. A second oven-dried vial, which was equipped with stir bar, was charged with imidazole derivative (1.2 mmol) and K<sub>3</sub>PO<sub>4</sub> (424 mg, 2.0 mmol) (aryl halides that were solid at room temperature were added at this point). The vial was sealed with a screw-cap septum, and then evacuated and backfilled with argon (this process was repeated a total of 3 times) and then aryl halide and the premixed catalyst solution was added by syringe to the second vial, followed by addition of toluene (0.53 mL) and dioxane (0.17 mL) (total 1.0 mL solvent). The reaction mixture was heated at 120 °C for 5 h. The reaction was cooled to room temperature, diluted with EtOAc, washed with brine,

dried over  $\text{MgSO}_4$ , concentrated in vacuo and purified via flash chromatography.

*Note:* When using 0.5 mol% catalyst loading, premixing should be performed at 3.5 mM  $\text{Pd}_2(\text{dba})_3$  or higher concentration. Otherwise, lower catalytic activity was observed due to the formation of Pd-black during the premixing stage.

#### 4-Methyl-1-phenyl-1H-imidazole (Table 1, entry 13)

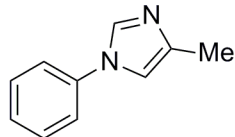

Following general procedure A, a mixture of bromobenzene (116  $\mu\text{L}$ , 1.0 mmol), 4-methylimidazole (98 mg, 1.2 mmol),  $\text{K}_3\text{PO}_4$  (424 mg, 2.0 mmol),  $\text{Pd}_2(\text{dba})_3$  (6.9 mg, 0.0075 mmol), **L1** (8.6 mg, 0.018 mmol) and toluene-dioxane (5:1, 1.0 mL) was heated to 120  $^\circ\text{C}$  for 5 h. The crude product was purified via flash chromatography (EtOAc/MeOH, 50:1) to provide the title compound as a light yellow solid (149 mg, 95%), mp 59-60  $^\circ\text{C}$ .  $^1\text{H}$  NMR (400 MHz,  $\text{CDCl}_3$ )  $\delta$  7.64 (d,  $J$  = 1.6 Hz, 1H), 7.36-7.29 (m, 2H), 7.25-7.17 (m, 3H), 6.89 (s, 1H), 2.20 (s, 3H);  $^{13}\text{C}$  NMR (100 MHz,  $\text{CDCl}_3$ )  $\delta$  139.4, 137.3, 134.4, 129.7, 126.9, 120.8, 114.4, 13.6; IR (film)  $\nu_{\text{max}}$  3385, 3108, 2921, 1599, 1507, 1448, 1392, 1366, 1291, 1241, 1070, 1003, 969, 817, 759, 692  $\text{cm}^{-1}$ ; Anal. Calcd. For  $\text{C}_{10}\text{H}_{10}\text{N}_2$ : C, 75.92; H, 6.37. Found: C, 76.01; H, 6.30.

#### 1-[3-(4-Methyl-imidazol-1-yl)-phenyl]-ethanone (Table 2, entry 1)

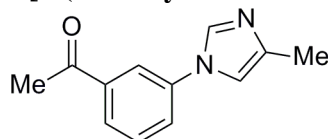

Following general procedure A, a mixture of 3'-bromoacetophenone (132  $\mu\text{L}$ , 1.0 mmol), 4-methylimidazole (98 mg, 1.2 mmol),  $\text{K}_3\text{PO}_4$  (424 mg, 2.0 mmol),  $\text{Pd}_2(\text{dba})_3$  (6.9 mg, 0.0075 mmol), **L1** (8.6 mg, 0.018 mmol) and toluene-dioxane (5:1, 1.0 mL) was heated to 120  $^\circ\text{C}$  for 5 h. The crude product was purified via flash chromatography (EtOAc/MeOH, 25:1) to provide the title compound as a white solid (1st run: 168 mg, 84%; 2nd run: 166 mg, 83%), mp 84-86  $^\circ\text{C}$ .  $^1\text{H}$  NMR (400 MHz,  $\text{CDCl}_3$ )  $\delta$  7.87 (1H), 7.85-7.80 (m, 1H), 7.74 (d,  $J$  = 1.2 Hz, 1 H), 7.53-7.47 (m, 2H), 7.01-6.98 (m, 1H), 2.58 (s, 3H), 2.23 (s, 3H);  $^{13}\text{C}$  NMR (100 MHz,  $\text{CDCl}_3$ )  $\delta$  196.9, 140.0, 138.6, 137.9, 134.5, 130.3, 126.9, 125.1, 120.1, 114.4, 26.8, 13.8; IR (film)  $\nu_{\text{max}}$  3360, 3119, 2926, 2359, 1685, 1593, 1502, 1452, 1364, 1261, 1163, 1073, 1032, 1005, 898, 798, 737, 687, 638, 590, 519  $\text{cm}^{-1}$ ; Anal. Calcd. For  $\text{C}_{12}\text{H}_{12}\text{N}_2\text{O}$ : C, 71.98; H, 6.04. Found: C, 71.88; H, 6.01.

#### 1-(3-(Benzyloxy)phenyl)-4-methyl-1H-imidazole (Table 2, entry 2)

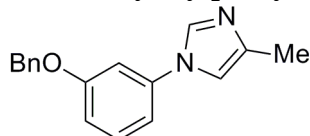

Following general procedure B, a mixture of 1-(benzyloxy)-3-bromobenzene (263 mg, 1.0 mmol), 4-methylimidazole (98 mg, 1.2 mmol),  $\text{K}_3\text{PO}_4$  (424 mg, 2.0 mmol),  $\text{Pd}_2(\text{dba})_3$  (2.3 mg, 0.0025 mmol), **L1** (2.4 mg, 0.005 mmol) and toluene-dioxane (5:1, 1.0 mL) was heated to 120  $^\circ\text{C}$  for 5 h. The crude product was purified via flash chromatography (EtOAc/MeOH, 25:1) to provide the title compound as a pale yellow solid (1st run: 247 mg, 94%; 2nd run: 243 mg, 92%), mp 57-58  $^\circ\text{C}$ .  $^1\text{H}$  NMR (400 MHz,  $\text{CDCl}_3$ )  $\delta$  7.66 (d,  $J$  = 1.2 Hz, 1H), 7.39-7.29 (m, 4H), 7.29-7.22 (m, 2H), 6.92-6.82 (m, 4H), 5.00 (s, 2H), 2.24 (s, 3 H);  $^{13}\text{C}$  NMR (100 MHz,  $\text{CDCl}_3$ )  $\delta$  159.7, 139.3, 138.4, 136.2, 134.4, 130.6, 128.6, 128.1, 127.4, 114.4, 113.2, 112.9, 108.0, 70.1, 13.7; IR (film)  $\nu_{\text{max}}$  3379, 3092, 3034, 2922, 1603, 1502, 1453, 1384, 1259, 1226, 1183, 1070, 1030, 988, 868, 838, 772, 741, 692, 626, 460  $\text{cm}^{-1}$ ; Anal. Calcd. For  $\text{C}_{17}\text{H}_{16}\text{N}_2\text{O}$ : C, 77.25; H, 6.10. Found: C, 76.92; H, 6.16.

**Methyl 5-(4-methyl-1H-imidazol-1-yl)benzoate (Table 2, entry 3)**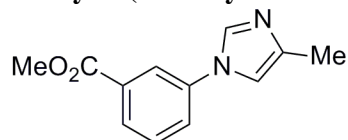

Following general procedure B, a mixture of methyl-3-bromobenzoate (215 mg, 1.0 mmol), 4-methylimidazole (98 mg, 1.2 mmol),  $K_3PO_4$  (424 mg, 2.0 mmol),  $Pd_2(dba)_3$  (2.3 mg, 0.0025 mmol), **L1** (2.4 mg, 0.005 mmol) and toluene-dioxane (5:1, 1.0 mL) was heated to 120 °C for 5 h. The crude product was purified via flash chromatography (EtOAc/MeOH, 20:1) to provide the title compound as a pale yellow solid (1st run: 194 mg, 90%; 2nd run: 198 mg, 92%), mp 50-51 °C.  $^1H$  NMR (400 MHz,  $CDCl_3$ )  $\delta$  7.88-7.80 (m, 2H), 7.68 (d,  $J$  = 1.6 Hz, 1H), 7.43-7.34 (m, 2H), 6.92 (s, 1H), 3.80 (s, 3H), 2.16 (s, 3H);  $^{13}C$  NMR (100 MHz,  $CDCl_3$ )  $\delta$  165.8, 139.8, 137.4, 134.3, 131.8, 129.8, 127.7, 124.7, 121.4, 114.2, 52.3, 13.6; IR (film)  $\nu_{max}$  3385, 3115, 2953, 1723, 1593, 1503, 1456, 1293, 1114, 1072, 1004, 962, 816, 756, 683, 625, 522  $cm^{-1}$ ; Anal. Calcd. For  $C_{12}H_{12}N_2O_2$ : C, 66.65; H, 5.59. Found: C, 66.95; H, 5.68.

**Methyl 5-(4-methyl-1H-imidazol-1-yl)nicotinate (Table 2, entry 4)**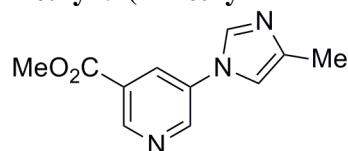

Following general procedure A, a mixture of methyl-3-bromonicotinate (216 mg, 1.0 mmol), 4-methylimidazole (98 mg, 1.2 mmol),  $K_3PO_4$  (424 mg, 2.0 mmol),  $Pd_2(dba)_3$  (6.9 mg, 0.0075 mmol), **L1** (8.6 mg, 0.018 mmol) and toluene-dioxane (5:1, 1.0 mL) was heated to 120 °C for 5 h. The crude product was purified via flash chromatography (EtOAc/MeOH, 15:1) to provide the title compound as a pale yellow solid (1st run: 180 mg, 83%; 2nd run: 186 mg, 86%), mp 124-126 °C.  $^1H$  NMR (400 MHz,  $CDCl_3$ )  $\delta$  9.09 (d,  $J$  = 1.6 Hz, 1H), 8.82 (d,  $J$  = 2.4 Hz, 1H), 8.22 (dd,  $J$  = 2.2, 1.6 Hz, 1H), 7.80 (d,  $J$  = 1.2 Hz, 1H), 7.03 (s, 1H), 3.93 (s, 3H), 2.24 (s, 3H);  $^{13}C$  NMR (100 MHz,  $CDCl_3$ )  $\delta$  164.8, 148.9, 145.6, 140.9, 134.5, 133.9, 128.7, 126.9, 114.1, 52.9, 13.7; IR (film)  $\nu_{max}$  3397, 3101, 2361, 1715, 1508, 1437, 1313, 1165, 1125, 1071, 1011, 954, 844, 764, 689  $cm^{-1}$ ; Anal. Calcd. For  $C_{11}H_{11}N_3O_2$ : C, 60.82; H, 5.10. Found: C, 60.84; H, 5.20.

**3-(4-Methyl-imidazol-1-yl)-quinoline (Table 2, entry 5)**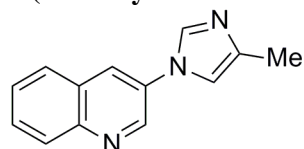

Following general procedure B, a mixture of 3-bromoquinoline (136  $\mu$ L, 1.0 mmol), 4-methylimidazole (98 mg, 1.2 mmol),  $K_3PO_4$  (424 mg, 2.0 mmol),  $Pd_2(dba)_3$  (2.3 mg, 0.0025 mmol), **L1** (2.4 mg, 0.018 mmol) and toluene-dioxane (5:1, 1.0 mL) was heated to 120 °C for 5 h. The crude product was purified via flash chromatography (EtOAc/MeOH, 10:1) to provide the title compound as a white solid (1st run: 192 mg, 92%; 2nd run: 200 mg, 96%), mp 122-123 °C.  $^1H$  NMR (400 MHz,  $CDCl_3$ )  $\delta$  8.82 (d,  $J$  = 2.4 Hz, 1H), 7.98 (d,  $J$  = 8.4 Hz, 1H), 7.87 (d,  $J$  = 2.0 Hz, 1H), 7.75 (s, 1H), 7.68 (d,  $J$  = 8.0 Hz, 1H), 7.60-7.54 (m, 1H), 7.48-7.42 (m, 1H), 6.98 (s, 1H), 2.20 (s, 3H);  $^{13}C$  NMR (100 MHz,  $CDCl_3$ )  $\delta$  146.7, 144.0, 140.2, 134.6, 130.6, 129.5, 129.3, 127.8, 127.5, 127.4, 125.6, 114.3, 13.6; IR (film)  $\nu_{max}$  3058, 2981, 2939, 2901, 1646, 1626, 1600, 1510, 1464, 1378, 1251, 1212, 1162, 1116, 1054, 981, 847, 809, 746, 625, 473  $cm^{-1}$ ; Anal. Calcd. For  $C_{13}H_{11}N_3$ : C, 74.62; H, 5.30. Found: C, 74.91; H, 5.36.

**1-(2-Fluorophenyl)-4-methyl-1H-imidazole (Table 2, entry 6)**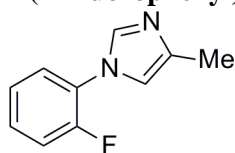

Following general procedure A, a mixture of 1-bromo-2-fluorobenzene (109  $\mu$ L, 1.0 mmol), 4-methylimidazole (98 mg, 1.2 mmol),  $K_3PO_4$  (424 mg, 2.0 mmol),  $Pd_2(dba)_3$  (6.9 mg, 0.0075 mmol), **L1** (8.6 mg, 0.018 mmol) and toluene-dioxane (5:1, 1.0 mL) was heated to 120  $^{\circ}C$  for 5 h. The crude product was purified via flash chromatography (EtOAc/MeOH, 20:1) to provide the title compound as a pale yellow solid (1st run: 163 mg, 93%; 2nd run: 168 mg, 96%), mp 56-57  $^{\circ}C$ .  $^1H$  NMR (400 MHz,  $CDCl_3$ )  $\delta$  7.57 (t,  $J$  = 1.6 Hz, 1H), 7.24-7.12 (m, 2H), 7.11-7.03 (m, 2H), 6.82 (s, 1H), 2.15 (s, 3H);  $^{13}C$  NMR (100 MHz,  $CDCl_3$ )  $\delta$  154.7 (d,  $J$  = 249 Hz), 138.7, 136.1 (d,  $J$  = 5.0 Hz), 128.4 (d,  $J$  = 8.0 Hz), 125.4 (d,  $J$  = 11 Hz), 124.9, 124.8 (d,  $J$  = 29 Hz), 117.0 (d,  $J$  = 21 Hz), 115.7 (d,  $J$  = 3.0 Hz), 13.5; IR (film)  $\nu_{max}$  3389, 2926, 1616, 1517, 1457, 1292, 1241, 1111, 1068, 972, 817, 759, 631, 470  $cm^{-1}$ ; Anal. Calcd. For  $C_{10}H_9FN_2$ : C, 68.17; H, 5.15. Found: C, 68.25; H, 5.09.

**2-(4-Methyl-1H-imidazol-1-yl)benzonitrile (Table 2, entry 7)**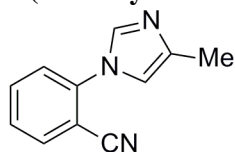

Following general procedure A, a mixture of 2-bromobenzonitrile (182 mg, 1.0 mmol), 4-methylimidazole (98 mg, 1.2 mmol),  $K_3PO_4$  (424 mg, 2.0 mmol),  $Pd_2(dba)_3$  (9.2 mg, 0.01 mmol), **L1** (10.6 mg, 0.022 mmol) and toluene-dioxane (5:1, 1.0 mL) was heated to 120  $^{\circ}C$  for 5 h. The crude product was purified via flash chromatography (EtOAc/MeOH, 25:1) to provide the title compound as a white solid (1st run: 161 mg, 88%; 2nd run: 159 mg, 87%), mp 128-129  $^{\circ}C$ .  $^1H$  NMR (400 MHz,  $CDCl_3$ )  $\delta$  7.75-7.62 (m, 3 H), 7.31 (t,  $J$  = 7.6 Hz, 1H), 7.37 (d,  $J$  = 8.0 Hz, 1 H), 7.01 (s, 1H), 2.23 (s, 3H);  $^{13}C$  NMR (100 MHz,  $CDCl_3$ )  $\delta$  139.8, 139.4, 135.8, 134.5, 134.4, 128.1, 125.4, 116.1, 115.9, 107.5, 13.7; IR (film)  $\nu_{max}$  3376, 3235, 2361, 2226, 1670, 1598, 1504, 1452, 1320, 1291, 1240, 1067, 973, 824, 766, 631, 515  $cm^{-1}$ ; Anal. Calcd. For  $C_{11}H_9N_3$ : C, 72.11; H, 4.95. Found: C, 71.93; H, 4.93.

***tert*-Butyl 4-(6-(4-methyl-1H-imidazol-1-yl)pyridin-2-yl)piperazine-1-carboxylate (Table 2, entry 8)**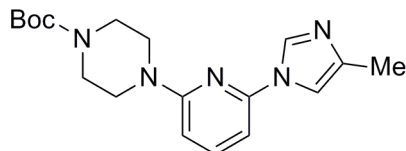

Following general procedure A, a mixture of *tert*-butyl 4-(6-bromopyridin-2-yl)piperazine-1-carboxylate<sup>4</sup> (342 mg, 1.0 mmol), 4-methylimidazole (98 mg, 1.2 mmol),  $K_3PO_4$  (424 mg, 2.0 mmol),  $Pd_2(dba)_3$  (9.2 mg, 0.01 mmol), **L1** (9.6 mg, 0.02 mmol) and toluene-dioxane (5:1, 1.0 mL) was heated to 120  $^{\circ}C$  for 5 h. The crude product was purified via flash chromatography (EtOAc-MeOH, 30:1) to provide the title compound as a white solid (1st run: 271 mg, 79%; 2nd run: 275 mg, 80%), mp 77-79  $^{\circ}C$ .  $^1H$  NMR (400 MHz,  $CDCl_3$ )  $\delta$  8.06 (d,  $J$  = 1.2 Hz, 1H), 7.44-7.38 (m, 1H), 7.16 (d,  $J$  = 1.2 Hz, 1H), 6.46 (d,  $J$  = 8.0 Hz, 1H), 6.37 (d,  $J$  = 7.6 Hz, 1H), 3.41 (s, 8H), 2.13 (s, 3H), 1.34 (s, 9H);  $^{13}C$  NMR (100 MHz,  $CDCl_3$ )  $\delta$  158.1, 154.6, 147.4, 140.0, 139.1, 134.0, 112.4, 104.1, 100.0, 79.9, 44.6, 42.9, 28.3, 13.7; IR (film)  $\nu_{max}$  3373, 2976, 2860, 2362, 2205, 1695, 1606, 1457, 1242, 1128, 1080, 1003, 932, 780, 730, 614, 536  $cm^{-1}$ .

## 2-Methyl-5-(4-methyl-1H-imidazol-1-yl)benzothiazole (Table 2, entry 9)

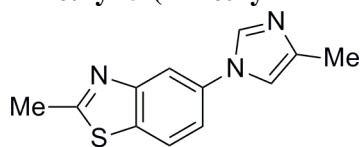

Following general procedure A, a mixture of 5-chloro-2-methylbenzothiazole (184 mg, 1.0 mmol), 4-methylimidazole (98 mg, 1.2 mmol),  $K_3PO_4$  (424 mg, 2.0 mmol),  $Pd_2(dba)_3$  (6.9 mg, 0.0075 mmol), **L1** (8.6 mg, 0.018 mmol) and toluene-dioxane (5:1, 1.0 mL) was heated to 120 °C for 5 h. The crude product was purified via flash chromatography (EtOAc/MeOH, 20:1) to provide the title compound as a white solid (1st run: 183 mg, 80%; 2nd run: 179 mg, 78%), mp 125-126 °C.  $^1H$  NMR (400 MHz,  $CDCl_3$ )  $\delta$  7.88-7.73 (m, 3H), 7.33-7.27 (m, 1H), 7.00 (d,  $J$  = 1.2 Hz, 1H), 2.80 (s, 3H), 2.27 (s, 3H);  $^{13}C$  NMR (100 MHz,  $CDCl_3$ )  $\delta$  169.7, 154.2, 139.8, 136.0, 134.9, 134.2, 122.5, 118.3, 115.0, 114.7, 20.4, 13.8; IR (film)  $\nu_{max}$  3394, 3104, 2920, 1610, 1498, 1432, 1295, 1256, 1173, 1054, 864, 804, 737, 644, 620, 537, 435  $cm^{-1}$ ; Anal. Calcd. For  $C_{12}H_{11}N_3S$ : C, 62.86; H, 4.84. Found: C, 62.56; H, 4.80.

## 3-Methoxy-4-(4-methyl-imidazol-1-yl)-benzoic acid methyl ester (Table 2, entry 10)

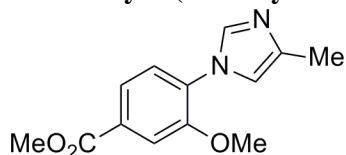

Following general procedure A, a mixture of 3-methoxy-4-trifluoromethanesulfonyloxy-benzoic acid methyl ester (312 mg, 1.0 mmol), 4-methylimidazole (98 mg, 1.2 mmol),  $K_3PO_4$  (424 mg, 2.0 mmol),  $Pd_2(dba)_3$  (6.9 mg, 0.0075 mmol), **L1** (8.6 mg, 0.018 mmol) and toluene-dioxane (5:1, 1.0 mL) was heated to 120 °C for 5 h. The crude product was purified via flash chromatography (EtOAc/MeOH, 20:1) to provide the title compound as a white solid (1st run: 188 mg, 77%; 2nd run: 186 mg, 76%), mp 85-87 °C.  $^1H$  NMR (400 MHz,  $dmsO-d_6$ )  $\delta$  7.92 (d,  $J$  = 1.6 Hz, 1H), 7.67 (d,  $J$  = 1.6 Hz, 1H), 7.64 (dd,  $J$  = 8.0, 1.6 Hz, 1H), 7.53 (d,  $J$  = 8.0 Hz, 1H), 7.23 (s, 1H), 3.90 (s, 3H), 3.89 (s, 3H), 2.16 (s, 3H);  $^{13}C$  NMR (100 MHz,  $dmsO-d_6$ )  $\delta$  166.1, 151.9, 137.2, 136.8, 130.4, 123.0, 124.6, 122.8, 116.6, 113.5, 56.3, 52.6, 13.2; IR (film)  $\nu_{max}$  2593, 2362, 1719, 1520, 1457, 1293, 1240, 1157, 1030, 982, 879, 832, 763, 637  $cm^{-1}$ .

## 4-Methyl-2-(4-methyl-imidazol-1-yl)-pyridine (Table 2, entry 11)

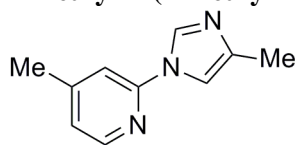

Following general procedure A, a mixture of trifluoromethanesulfonic acid 4-methoxy-pyridin-2-yl ester (170  $\mu$ L, 1.0 mmol), 4-methylimidazole (98 mg, 1.2 mmol),  $K_3PO_4$  (424 mg, 2.0 mmol),  $Pd_2(dba)_3$  (6.9 mg, 0.0075 mmol), **L1** (8.6 mg, 0.018 mmol) and toluene-dioxane (5:1, 1.0 mL) was heated to 120 °C for 5 h. The crude product was purified via flash chromatography (EtOAc/MeOH, 20:1) to provide the title compound as pale yellow oil (1st run: 140 mg, 81%; 2nd run: 136 mg, 79%).  $^1H$  NMR (400 MHz,  $CDCl_3$ )  $\delta$  8.19 (d,  $J$  = 4.8 Hz, 1H), 8.15 (s, 1H), 7.24 (s, 1H), 7.01 (s, 1H), 6.92 (d,  $J$  = 4.4 Hz, 1H), 2.32 (s, 3H), 2.21 (s, 3H);  $^{13}C$  NMR (100 MHz,  $CDCl_3$ )  $\delta$  150.5, 149.3, 148.6, 139.7, 134.2, 122.7, 112.6, 112.5, 21.2, 13.8; IR (film)  $\nu_{max}$  3402, 2926, 1613, 1489, 1447, 1291, 1174, 1079, 1032, 827, 728, 634, 521, 447  $cm^{-1}$ .

### 3-(4-Phenyl-1*H*-imidazol-1-yl)pyridine (Table 2, entry 12)

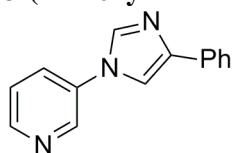

Following general procedure A, a mixture of 3-chloropyridine (95  $\mu$ L, 1.0 mmol), 4-phenylimidazole (173 mg, 1.2 mmol),  $K_3PO_4$  (424 mg, 2.0 mmol),  $Pd_2(dba)_3$  (6.9 mg, 0.0075 mmol), **L1** (8.6 mg, 0.018 mmol) and toluene-dioxane (5:1, 1.0 mL) was heated to 120  $^{\circ}C$  for 5 h. The crude product was purified via flash chromatography (100% EtOAc) to provide the title compound as an off-white solid (1st run: 197 mg, 89%; 2nd run: 194 mg, 88%), mp 137-139  $^{\circ}C$ .  $^1H$  NMR (400 MHz,  $CDCl_3$ )  $\delta$  8.70 (d,  $J$  = 2.4 Hz, 1H), 8.54 (d,  $J$  = 4.8 Hz, 1H), 7.82 (s, 1H), 7.75 (d,  $J$  = 7.6 Hz, 2H), 7.67-7.61 (m, 1H), 7.48 (s, 1H), 7.38-7.26 (m, 3H), 7.25-7.17 (m, 1H);  $^{13}C$  NMR (100 MHz,  $CDCl_3$ )  $\delta$  148.8, 143.9, 142.6, 135.6, 133.7, 133.3, 128.8, 128.6, 127.4, 125.1, 124.3, 113.4; IR (film)  $\nu_{max}$  3398, 3095, 2360, 1586, 1501, 1441, 1387, 1284, 1189, 1067, 965, 939, 803, 747, 694, 617  $cm^{-1}$ ; Anal. Calcd. For  $C_{14}H_{11}N_3$ : C, 76.00; H, 5.01. Found: C, 75.37; H, 5.09.

### Dimethyl-[3-(4-phenyl-imidazol-1-yl)-phenyl]-amine (Table 2, entry 13)

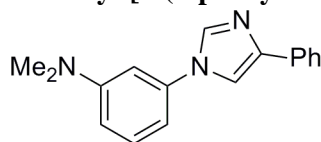

Following general procedure A, a mixture of 3-bromo-*N,N*-dimethylaniline (143  $\mu$ L, 1.0 mmol), 4-phenylimidazole (173 mg, 1.2 mmol),  $K_3PO_4$  (424 mg, 2.0 mmol),  $Pd_2(dba)_3$  (6.9 mg, 0.0075 mmol), **L1** (8.6 mg, 0.018 mmol) and toluene-dioxane (5:1, 1.0 mL) was heated to 120  $^{\circ}C$  for 5 h. The crude product was purified via flash chromatography (EtOAc/hexanes, 1:1) to provide the title compound as an off-white solid (1st run: 256 mg, 97%; 2nd run: 250 mg, 95%), mp 104-105  $^{\circ}C$ .  $^1H$  NMR (400 MHz,  $CDCl_3$ )  $\delta$  7.89-7.84 (m, 3H), 7.53 (d,  $J$  = 1.2 Hz, 1H), 7.41-7.36 (m, 2H), 7.28-7.21 (m, 2H), 6.70-6.60 (m, 3H), 2.93 (s, 6H);  $^{13}C$  NMR (100 MHz,  $CDCl_3$ )  $\delta$  151.4, 142.6, 138.1, 135.7, 134.0, 130.2, 128.6, 126.8, 124.8, 114.0, 111.2, 108.9, 104.8, 40.2; IR (film)  $\nu_{max}$  3386, 3073, 2892, 2356, 1604, 1502, 1349, 1244, 1173, 1063, 942, 828, 751, 691, 467  $cm^{-1}$ ; Anal. Calcd. For  $C_{17}H_{17}N_3$ : C, 77.54; H, 6.51. Found: C, 77.21; H, 6.38.

### *N*-(2-(1-(Naphthalen-2-yl)-1*H*-imidazol-4-yl)ethyl)acetamide (Table 2, entry 14)

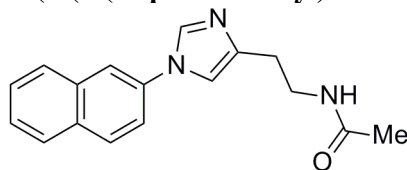

Following general procedure A, a mixture of 2-bromonaphthalene (207 mg, 1.0 mmol), *N*-acetylhistamine (184 mg, 1.2 mmol),  $K_3PO_4$  (424 mg, 2.0 mmol),  $Pd_2(dba)_3$  (6.9 mg, 0.0075 mmol), **L1** (8.6 mg, 0.018 mmol) and toluene-dioxane (5:1, 1.0 mL) was heated to 120  $^{\circ}C$  for 5 h. The crude product was purified via flash chromatography (EtOAc/MeOH, 9:1) to provide the title compound as a pale yellow solid (1st run: 264 mg, 95%; 2nd run: 262 mg, 94%), mp 137-138  $^{\circ}C$ .  $^1H$  NMR (400 MHz,  $CDCl_3$ )  $\delta$  7.89-7.74 (m, 4H), 7.69 (s, 1H), 7.52-7.37 (m, 3H), 7.15 (s, 1H), 6.97 (s, 1H), 3.57 (q,  $J$  = 6.4 Hz, 2H), 2.81 (t,  $J$  = 6.4 Hz, 2H), 1.96 (s, 3H);  $^{13}C$  NMR (100 MHz,  $CDCl_3$ )  $\delta$  170.3, 141.6, 135.1, 134.5, 133.5, 132.1, 130.1, 127.9, 127.8, 127.4, 126.5, 119.8, 118.6, 115.2, 39.4, 27.8, 23.4; IR (film)  $\nu_{max}$  3274, 3068, 2361, 1652, 1558, 1514, 1373, 1274, 1067, 993, 855, 814, 751, 625, 474  $cm^{-1}$ ; Anal. Calcd. For  $C_{14}H_{15}NO_2$ : C, 73.10; H, 6.13. Found: C, 73.09; H, 6.13.

**2-(1-(6-Methoxypyridin-2-yl)-1H-imidazol-4-yl)acetonitrile (Table 2, entry 15)**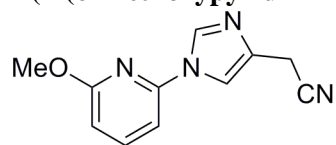

Following general procedure A (0.5 mmol scale), a mixture of 6-bromo-2-methoxypyridine (61  $\mu$ L, 0.5 mmol), 4-cyanomethylimidazole (64 mg, 0.6 mmol),  $K_3PO_4$  (212 mg, 1.0 mmol),  $Pd_2(dba)_3$  (3.4 mg, 0.00375 mmol), **L1** (4.3 mg, 0.009 mmol) and toluene-dioxane (5:1, 0.5 mL) was heated to 120  $^{\circ}C$  for 5 h. The crude product was purified via flash chromatography (EtOAc) to provide the title compound as a white solid (1st run: 98 mg, 92%; 2nd run: 93 mg, 87%), mp 77-78  $^{\circ}C$ .  $^1H$  NMR (400 MHz,  $CDCl_3$ )  $\delta$  8.23 (d,  $J$  = 1.2 Hz, 1H), 7.63 (t,  $J$  = 8.0 Hz, 1H), 7.58 (d,  $J$  = 1.2 Hz, 1H), 6.84 (d,  $J$  = 7.6 Hz, 1H), 6.24 (d,  $J$  = 8.4 Hz, 1H), 3.91 (s, 3H), 3.73 (s, 2H);  $^{13}C$  NMR (100 MHz,  $CDCl_3$ )  $\delta$  163.8, 146.5, 141.2, 135.2, 133.0, 117.4, 114.0, 109.2, 103.6, 53.8, 17.9; IR (film)  $\nu_{max}$  3745, 3132, 2941, 2361, 1614, 1582, 1475, 1420, 1255, 1150, 1090, 1034, 995, 862, 784, 726, 669, 607, 475  $cm^{-1}$ ; Anal. Calcd. For  $C_{11}H_{10}N_4O$ : C, 61.67; H, 4.71. Found: C, 61.41; H, 4.69.

**2-(1-(6-(Pyrrolidin-1-yl)pyrazin-2-yl)-1H-imidazol-4-yl)acetonitrile (Table 2, entry 16)**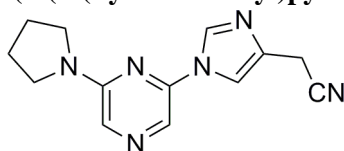

Following general procedure A, a mixture of 2-chloro-6-(pyrrolidin-1-yl)pyrazine (184 mg, 1.0 mmol), 4-cyanomethylimidazole (129 mg, 1.2 mmol),  $K_3PO_4$  (424 mg, 2.0 mmol),  $Pd_2(dba)_3$  (11.4 mg, 0.0125 mmol), **L1** (12 mg, 0.025 mmol) and toluene-dioxane (5:1, 1.0 mL) was heated to 130  $^{\circ}C$  for 5 h. The crude product was purified via flash chromatography (EtOAc-MeOH, 30:1) to provide the title compound as a white solid (1st run: 231 mg, 91%; 2nd run: 234 mg, 92%), mp 117-118  $^{\circ}C$ .  $^1H$  NMR (400 MHz,  $CDCl_3$ )  $\delta$  8.11 (d,  $J$  = 1.2 Hz, 1H), 7.75 (s, 1H), 7.63 (s, 1H), 7.48 (d,  $J$  = 1.2 Hz, 1H), 3.65 (s, 2H), 3.43-3.30 (m, 4H), 1.99-1.85 (m, 4H);  $^{13}C$  NMR (100 MHz,  $CDCl_3$ )  $\delta$  151.2, 142.6, 134.9, 132.8, 128.6, 118.3, 117.2, 113.5, 46.3, 25.1, 17.6; IR (film)  $\nu_{max}$  3400, 3117, 2965, 2869, 2359, 2251, 1590, 1552, 1485, 1349, 1225, 1050, 985, 918, 830, 734, 615, 480  $cm^{-1}$ .

**Ethyl 4-(4-methyl-1H-benzimidazol-1-yl)benzoate (Table 2, entry 17)**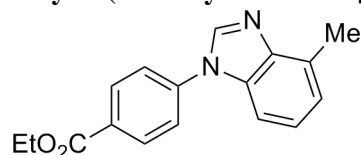

Following general procedure A, a mixture of ethyl 4-chlorobenzoate (156  $\mu$ L, 1.0 mmol), 4-methylbenzimidazole (145 mg, 1.1 mmol),  $K_3PO_4$  (424 mg, 2.0 mmol),  $Pd_2(dba)_3$  (4.6 mg, 0.005 mmol), **L1** (4.8 mg, 0.01 mmol) and toluene-dioxane (5:1, 1.0 mL) was heated to 120  $^{\circ}C$  for 5 h. The crude product was purified via flash chromatography (Hexanes/EtOAc, 1:1) to provide the title compound as a pale yellow solid (1st run: 254 mg, 91%; 2nd run: 249 mg, 89%), mp 107-108  $^{\circ}C$ . Regiochemistry of the title compound was confirmed by strong NOE between  $H^7$  proton of the benzimidazole ring and  $H^{3/5}$  proton of the benzoate ring.  $^1H$  NMR (400 MHz,  $CDCl_3$ )  $\delta$  8.25-8.20 (m, 2H), 8.11 (s, 1H), 7.60-7.55 (m, 2H), 7.40-7.36 (m, 1H), 7.25-7.20 (m, 1H), 7.16-7.11 (m, 1H), 4.41 (q,  $J$  = 7.2 Hz, 2H), 2.70 (s, 3H), 1.40 (t,  $J$  = 7.6 Hz, 3H);  $^{13}C$  NMR (100 MHz,  $CDCl_3$ )  $\delta$  165.6, 143.6, 141.1, 140.3, 132.8, 131.6, 130.9, 129.7, 124.1, 123.6, 123.2, 108.0, 61.4, 16.8, 14.4; IR (film)  $\nu_{max}$  3410, 2981, 1715, 1603, 1501, 1369, 1277, 1177, 1106, 1019, 855, 762, 706, 622  $cm^{-1}$ ; Anal. Calcd. For  $C_{17}H_{16}N_2O_2$ : C, 72.84; H, 5.75. Found: C, 72.88; H, 5.71.

### 5-(4-Propoxy-1*H*-benzo[*d*]imidazol-1-yl)nicotinonitrile (Table 2, entry 18)

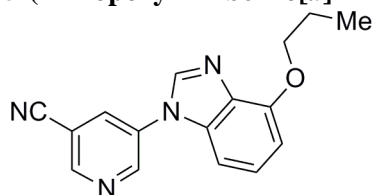

Following general procedure A, a mixture of 2-bromo-5-cyanopyridine (183 mg, 1.0 mmol), 4-propoxybenzimidazole (194 mg, 1.1 mmol),  $K_3PO_4$  (424 mg, 2.0 mmol),  $Pd_2(dba)_3$  (6.9 mg, 0.0075 mmol), **L1** (8.6 mg, 0.018 mmol) and toluene-dioxane (5:1, 1.0 mL) was heated to 120 °C for 5 h. The crude product was purified via flash chromatography (Hexanes/EtOAc, 2:3) to provide the title compound as an off-white solid (1st run: 239 mg, 86%; 2nd run: 236 mg, 85%), mp 121-122 °C. Regiochemistry of the title compound was confirmed by strong NOE between  $H^7$  proton of the benzimidazole ring and  $H^{4/6}$  proton of the pyridine ring.  $^1H$  NMR (400 MHz,  $CDCl_3$ )  $\delta$  9.04-9.01 (m, 1H), 8.90-8.80 (m, 1H), 8.16-8.13 (m, 1H), 8.01 (s, 1H), 7.28-7.22 (m, 1H), 7.03 (dd,  $J$  = 0.8, 7.2 Hz, 1H), 6.76 (dd,  $J$  = 0.8, 7.2 Hz, 1H), 4.15 (t,  $J$  = 6.8 Hz, 2H), 1.96-1.85 (m, 2H), 1.05 (t,  $J$  = 7.6 Hz, 3H);  $^{13}C$  NMR (100 MHz,  $CDCl_3$ )  $\delta$  151.8, 151.0, 148.2, 139.8, 134.4, 133.7, 133.6, 133.4, 125.8, 115.4, 111.0, 105.7, 102.0, 70.5, 22.5, 10.6; IR (film)  $\nu_{max}$  3428, 2967, 1594, 1496, 1462, 1282, 1216, 1087, 1002, 900, 828, 779, 737, 699  $cm^{-1}$ ; Anal. Calcd. For  $C_{16}H_{16}N_4O$ : C, 69.05; H, 5.07. Found: C, 68.94; H, 5.10.

### 3-(4-Bromophenyl)-1,4-diazaspiro[4.4]nonan-2-one

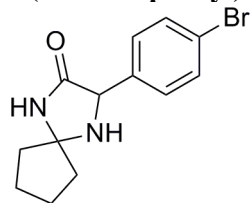

To a stirred solution of 4-bromobenzaldehyde (18.0 g 97.3 mmol) in EtOH (45 mL) in a 300 mL round-bottomed flask, were added a solution of  $NH_4OAc$  (22.5 g, 292 mmol) and NaCN (5.24 g, 107 mmol) in  $H_2O$  (16.4 mL) and 30% aq.  $NH_4OH$  (38 mL) at room temperature. The reaction mixture was stirred at room temperature for 4 h and then TBME (*tert*-butyl methyl ether) (100 mL) was added. The mixture was transferred to a separatory funnel and the aqueous phase was removed. The organic phase was washed with  $H_2O$  (80 mL, 2 times), brine (80 mL) and then,  $H_2O$  (60 mL). The organic phase was dried over  $MgSO_4$  and concentrated to ca. 30 mL. *n*-BuOH (180 mL) was added to the concentrated solution followed by cyclopentanone (21.5 mL, 243 mmol) and NaOEt (21 wt% in EtOH, 3.7 mL). The reaction mixture was stirred at 80 °C for 16 h. The dark-brown solution was concentrated to ca. 2/3 volume (white precipitate appeared at this point) and then cooled to 0 °C (ice bath). The precipitate was collected by filtration, washed 3-times with cold EtOH and dried in vacuo to give the title compound as an off-white solid (10.9 g, 38%), mp 178-179 °C.  $^1H$  NMR (400 MHz,  $dmsO-d_6$ )  $\delta$  8.55 (s, 1H), 7.52 (d,  $J$  = 8.4 Hz, 2H), 7.43 (d,  $J$  = 8.4 Hz, 2H), 4.52 (d,  $J$  = 8.4 Hz, 1H), 3.61 (d,  $J$  = 8.8 Hz, 1H), 1.89-1.55 (m, 8H);  $^{13}C$  NMR (100 MHz,  $dmsO-d_6$ )  $\delta$  173.4, 139.8, 130.7, 129.4, 120.1, 81.6, 61.1, 40.3, 38.7, 22.6, 22.4; IR (film)  $\nu_{max}$  3853, 3647, 2362, 1699, 1652, 1558, 1540, 1386, 1071, 757, 668  $cm^{-1}$ ; Anal. Calcd. For  $C_{13}H_{15}BrN_2O$ : C, 52.90; H, 5.12. Found: C, 52.74; H, 5.19.

### 3-(4-Chlorophenyl)-1,4-diazaspiro[4.4]nonan-2-one

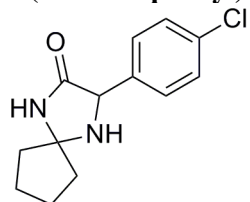

To a stirred solution of 4-chlorobenzaldehyde (14.1 g 100 mmol) in EtOH (50 mL) in a 300 mL round-bottomed flask, were added a solution of NH<sub>4</sub>OAc (23.1 g, 300 mmol) and NaCN (5.39 g, 110 mmol) in H<sub>2</sub>O (18 mL) and 30% aq. NH<sub>4</sub>OH (40 mL) at room temperature. The reaction mixture was stirred at room temperature for 4 h and then TBME (100 mL) was added. The mixture was transferred to a separatory funnel and the aqueous phase was removed. The organic phase was washed with H<sub>2</sub>O (80 mL, 2 times), brine (80 mL) and then, H<sub>2</sub>O (60 mL). The organic phase was dried over MgSO<sub>4</sub> and concentrated to ca. 30 mL. *n*-BuOH (180 mL) was added to the concentrated solution followed by cyclopentanone (22.1 mL, 250 mmol) and NaOEt (21 wt% in EtOH, 3.8 mL). The reaction mixture was stirred at 80 °C for 16 h. The dark-brown solution was concentrated to ca. 2/3 volume (white precipitate appeared at this point) and then cooled to 0 °C (ice bath). The precipitate was collected by filtration, washed 3-times with cold EtOH and dried in vacuo to give the title compound as an off-white solid (7.98 g, 32%), mp 174-176 °C. <sup>1</sup>H NMR (400 MHz, dms-*d*<sub>6</sub>) δ 8.55 (s, 1H), 7.49 (d, *J* = 8.4 Hz, 2H), 7.38 (d, *J* = 8.4 Hz, 2H), 4.54 (d, *J* = 8.8 Hz, 1H), 3.61 (d, *J* = 8.8 Hz, 1H), 1.89-1.56 (m, 8H); <sup>13</sup>C NMR (100 MHz, dms-*d*<sub>6</sub>) δ 173.4, 139.4, 131.5, 129.0, 127.8, 81.6, 61.0, 22.6, 22.4; IR (film) ν<sub>max</sub> 3854, 3745, 3214, 2336, 1699, 1652, 1558, 1540, 1457, 1386, 1092, 768, 668 cm<sup>-1</sup>; Anal. Calcd. For C<sub>13</sub>H<sub>15</sub>ClN<sub>2</sub>O: C, 62.28; H, 6.03. Found: C, 62.41; H, 6.03.

### 3-(4-Bromophenyl)-1,4-diazaspiro[4.4]non-3-en-2-one (1a)

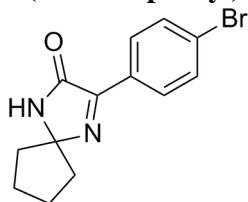

An oven-dried 500 mL round-bottomed flask was equipped with a stir bar and charged with 3-(4-bromophenyl)-1,4-diazaspiro[4.4]nonan-2-one (10.0 g, 33.9 mmol) and DDQ (8.46 g, 37.3 mmol) and then EtOAc (200 mL) was added. The reaction mixture was stirred at 60 °C for 1 h. The reaction mixture was washed 2-times with sodium sulfite solution (20 wt% in H<sub>2</sub>O, 140 mL and 70 mL) and then, H<sub>2</sub>O (70 mL). The organic phase was dried over MgSO<sub>4</sub>, concentrated to ca. 80 mL and white precipitate that had formed was collected by filtration, washed 2 times with EtOAc and dried in vacuo to provide the title compound as an off-white solid (8.82 g, 89%), mp 184-185 °C. <sup>1</sup>H NMR (400 MHz, dms-*d*<sub>6</sub>) δ 10.08 (s, 1H), 8.26 (d, *J* = 8.8 Hz, 2H), 7.70 (d, *J* = 8.4 Hz, 2H), 2.00-1.75 (m, 8H); <sup>13</sup>C NMR (100 MHz, dms-*d*<sub>6</sub>) δ 163.9, 158.9, 131.6, 129.8, 125.2, 89.7, 37.0, 23.8 (aromatic C1 and C2 carbons are overlapped); IR (film) ν<sub>max</sub> 3853, 3745, 3153, 3056, 2955, 2361, 1707, 1652, 1558, 1476, 1381, 1264, 1002, 832, 744, 602, 525 cm<sup>-1</sup>; Anal. Calcd. For C<sub>13</sub>H<sub>13</sub>BrN<sub>2</sub>O: C, 53.62; H, 4.47. Found: C, 53.45; H, 4.49.

### 3-(4-Chlorophenyl)-1,4-diazaspiro[4.4]non-3-en-2-one (1b)

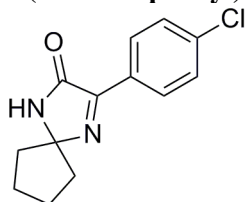

An oven-dried 500 mL round-bottomed flask was equipped with a stir bar and charged with 3-(4-chlorophenyl)-1,4-diazaspiro[4.4]nonan-2-one (6.7 g, 26.8 mmol) and DDQ (6.68 g, 29.4 mmol) and then, EtOAc (150 mL) was added. The reaction mixture was stirred at 60 °C for 1 h. The reaction mixture was washed 2-times with sodium sulfite solution (20 wt% in H<sub>2</sub>O, 140 mL and 70 mL) and then, H<sub>2</sub>O (70 mL). The organic phase was dried over MgSO<sub>4</sub>, concentrated to ca. 60 mL and hexanes (60 mL) was added. White precipitate that had formed was collected by filtration, washed 2 times with EtOAc-hexanes (1:1) and dried in vacuo to provide the title compound as an off-white solid (5.98 g, 90%), mp 174-176 °C.

$^1\text{H}$  NMR (400 MHz,  $\text{dms}\text{-}d_6$ )  $\delta$  10.08 (s, 1H), 8.34 (d,  $J$  = 8.8 Hz, 2H), 7.56 (d,  $J$  = 8.8 Hz, 2H), 2.00-1.76 (m, 8H);  $^{13}\text{C}$  NMR (100 MHz,  $\text{dms}\text{-}d_6$ )  $\delta$  163.9, 158.8, 136.2, 129.6, 129.5, 128.7, 89.7, 37.0, 23.8; IR (film)  $\nu_{\text{max}}$  3853, 3745, 3140, 3040, 2362, 1701, 1652, 1540, 1558, 1473, 1386, 1263, 1084, 838, 758, 668, 529  $\text{cm}^{-1}$ ; Anal. Calcd. For  $\text{C}_{13}\text{H}_{13}\text{ClN}_2\text{O}$ : C, 62.78; H, 5.27. Found: C, 62.63; H, 5.35.

### 3-(4-(4-Methyl-1H-imidazol-1-yl)phenyl)-1,4-diazaspiro[4.4]non-3-en-2-one (2)

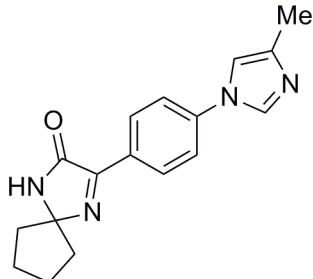

**From 1a:** An oven-dried vial was equipped with a magnetic stir bar and charged with  $\text{Pd}_2(\text{dba})_3$  (4.6 mg, 0.005 mmol) and **L1** (4.8 mg, 0.01 mmol). The vial was sealed with a screw-cap septum, and then evacuated and backfilled with argon (this process was repeated a total of 3 times). Then, toluene (0.6 mL) was added via syringe. This dark purple mixture was stirred at 130 °C for 3 min. A second oven-dried vial which was equipped with stir bar was charged with **1a** (298 mg, 1.0 mmol), 4-methylimidazole (164 mg, 2.0 mmol) and  $\text{K}_3\text{PO}_4$  (424 mg, 2.0 mmol). The vial was sealed with a screw-cap septum, and then evacuated and backfilled with argon (this process was repeated a total of 3 times). 0.12 mL of the premixed catalyst solution was transferred to the second vial via syringe and then toluene (0.5 mL) and dioxane (0.5 mL) were added to the second vial. The reaction was heated at 130 °C for 6 h. The reaction mixture was cooled to room temperature, diluted with EtOAc, washed with brine, dried over  $\text{MgSO}_4$ , concentrated in vacuo and purified via flash chromatography (EtOAc-MeOH, 15:1) to provide the title compound as a white solid (273 mg, 93%), mp 194-195 °C.

**From 1b:** An oven-dried vial was equipped with a magnetic stir bar and charged with  $\text{Pd}_2(\text{dba})_3$  (4.6 mg, 0.005 mmol) and **L1** (4.8 mg, 0.01 mmol). The vial was sealed with a screw-cap septum, and then evacuated and backfilled with argon (this process was repeated a total of 3 times). Then, anhydrous toluene (0.6 mL) was added via syringe. This dark purple mixture was stirred at 130 °C for 3 min. A second oven-dried vial which was equipped with stir bar was charged with **1b** (249 mg, 1.0 mmol), 4-methylimidazole (164 mg, 2.0 mmol) and  $\text{K}_3\text{PO}_4$  (424 mg, 2.0 mmol). The vial was sealed with a screw-cap septum, and then evacuated and backfilled with argon (this process was repeated a total of 3 times). 0.18 mL of the premixed catalyst solution was transferred to the second vial via syringe and then toluene (0.5 mL) and dioxane (0.5 mL) were added to the second vial. The reaction was heated at 130 °C for 6 h. The reaction mixture was cooled to room temperature, diluted with EtOAc, washed with brine, dried over  $\text{MgSO}_4$ , concentrated in vacuo and purified via flash chromatography (EtOAc-MeOH, 15:1) to provide the title compound as a white solid (270 mg, 92%), mp 195 °C.

$^1\text{H}$  NMR (400 MHz,  $\text{dms}\text{-}d_6$ )  $\delta$  10.09 (s, 1H), 8.42 (d,  $J$  = 8.8 Hz, 2H), 8.26 (d,  $J$  = 1.2 Hz, 1H), 7.74 (d,  $J$  = 8.8 Hz, 2H), 7.52 (s, 1H), 2.17 (s, 3H), 2.00-1.77 (m, 8H);  $^{13}\text{C}$  NMR (100 MHz,  $\text{dms}\text{-}d_6$ )  $\delta$  164.1, 158.8, 138.9, 138.8, 134.7, 129.4, 128.5, 119.3, 113.8, 89.6, 37.1, 23.9, 13.6; IR (film)  $\nu_{\text{max}}$  3854, 3745, 3158, 3050, 2962, 2360, 1704, 1606, 1518, 1442, 1254, 1191, 1063, 963, 848, 752, 609, 540  $\text{cm}^{-1}$ ; Anal. Calcd. For  $\text{C}_{17}\text{H}_{18}\text{N}_4\text{O}$ : C, 69.37; H, 6.16. Found: C, 69.38; H, 6.11.

**2-(3-(4-(4-Methyl-1H-imidazol-1-yl)phenyl)-2-oxo-1,4-diazaspiro[4.4]non-3-en-1-yl)-N-(3-(trifluoromethyl)phenyl)acetamide (GSK2137305) (3)**

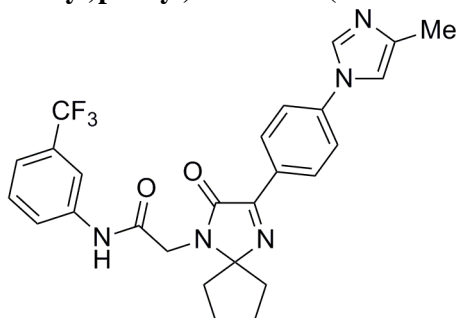

An oven-dried vial was equipped with a stir bar and charged with chloroacetyl chloride (175  $\mu$ L, 2.3 mmol) and 3-aminobenzotrifluoride (287  $\mu$ L, 2.3 mmol). NMP (2.0 mL) was added to the vial and stirred at room temperature for 15 min. The reaction mixture was transferred to a stirred solution of **2** (589 mg, 2.0 mmol) and 45 wt% aq. KOH (440  $\mu$ L, 5 mmol) in NMP (1.5 mL) in a separate vial. The reaction mixture was stirred at room temperature for 6 h (white precipitate appeared at this point), then H<sub>2</sub>O (4.0 mL) was added. The reaction mixture was heated to 70 °C and then cooled to room temperature. The white precipitate was collected by filtration, washed with H<sub>2</sub>O and isopropanol and dried in vacuo to provide the title compound as a white solid (812 mg, 82%), mp 244-246 °C. <sup>1</sup>H NMR (400 MHz, dms-*d*<sub>6</sub>)  $\delta$  10.60 (s, 1H), 8.45 (d, *J* = 8.8 Hz, 2H), 8.28 (d, *J* = 1.2 Hz, 1H), 8.11 (s, 1H), 7.82-7.74 (m, 3H), 7.61-7.53 (m, 2H), 7.42 (d, *J* = 8.0 Hz, 1H), 4.38 (s, 2H), 2.20-1.85 (m, 9H), 1.75-1.64 (m, 2H); <sup>13</sup>C NMR (100 MHz, dms-*d*<sub>6</sub>)  $\delta$  166.3, 162.6, 157.5, 139.4, 139.1, 138.9, 134.8, 130.1, 129.5 (q, *J* = 31 Hz), 129.4, 128.3, 124.1 (q, *J* = 271 Hz), 122.8, 119.9 (q, *J* = 4.0 Hz), 119.4, 115.2 (q, *J* = 3.0 Hz), 113.8, 93.3, 43.4, 34.4, 23.6, 13.6; IR (film)  $\nu_{\text{max}}$  3854, 3746, 2362, 1884, 1772, 1678, 1653, 1616, 1559, 1516, 1417, 1312, 1251, 1160, 1118, 1065, 949, 888, 852, 793, 721, 691, 668, 623, 545, 466 cm<sup>-1</sup>; Anal. Calcd. For C<sub>26</sub>H<sub>24</sub>F<sub>3</sub>N<sub>5</sub>O<sub>2</sub>: C, 63.02; H, 4.88. Found: C, 62.58; H, 5.06.

**3-(4-Methyl-1H-imidazol-1-yl)-5-(trifluoromethyl)aniline (5)**

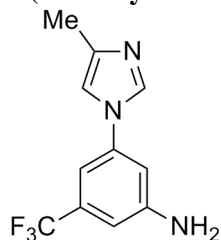

An oven-dried vial was equipped with a magnetic stir bar and charged with Pd<sub>2</sub>(dba)<sub>3</sub> (2.3 mg, 0.0025 mmol) and **L1** (2.4 mg, 0.0025 mmol). The vial was sealed with a screw-cap septum, and then evacuated and backfilled with argon (this process was repeated a total of 3 times). Anhydrous toluene (0.5 mL) was added via syringe and the dark purple mixture was stirred at 120 °C for 3 min. The color of the mixture turns to red-brown after 3 min. A second oven-dried vial which was equipped with stir bar was charged with 3-amino-5-bromobenzotrifluoride **4** (240 mg, 1.0 mmol), 4-methylimidazole (197 mg, 2.4 mmol) and K<sub>3</sub>PO<sub>4</sub> (424 mg, 2.0 mmol). The vial was sealed with a screw-cap septum, and then evacuated and backfilled with argon (this process was repeated a total of 3 times). The premixed catalyst solution followed by anhydrous toluene (0.5 mL) and *t*BuOH (1.0 mL) were added via syringe to the second vial (total 2 mL of toluene-*t*BuOH 1:1 solution). The reaction was heated at 120 °C for 12 h. The reaction mixture was cooled to room temperature, diluted with EtOAc, washed with brine, dried over MgSO<sub>4</sub>, concentrated in vacuo and purified via flash chromatography (Et<sub>2</sub>O/EtOAc/MeOH, 125:125:1) to provide the title compound as a white solid (216 mg, 90%), mp 124-126 °C. <sup>1</sup>H NMR (400 MHz, dms-*d*<sub>6</sub>)  $\delta$  8.09 (d, *J* = 1.2 Hz, 1H), 7.36 (s, 1H), 6.98 (s, 1H), 6.96 (s, 1H), 6.84 (s, 1H), 5.91 (s, 2H), 2.15 (s, 3H); <sup>13</sup>C NMR (100 MHz, dms-*d*<sub>6</sub>)  $\delta$  150.9, 138.5, 134.8, 131.3 (q, *J* = 38 Hz), 124.1 (q, *J* = 272 Hz), 114.2,

107.9, 103.3 (q,  $J = 4$  Hz), 13.5; IR (film)  $\nu_{\text{max}}$  3854, 3745, 3414, 3215, 2362, 1620, 1509, 1412, 1328, 1293, 1254, 1199, 1158, 1115, 843, 807, 735, 691, 621  $\text{cm}^{-1}$ ; Anal. Calcd. For  $\text{C}_{11}\text{H}_{10}\text{F}_3\text{N}_3$ : C, 54.77; H, 4.18. Found: C, 54.69; H, 4.05.

*Note* : The use of an excess ( $> 2.0$  eq.) amount of 4-methylimidazole, toluene/*t*BuOH mixed solvent and 0.5 M concentration of aryl bromide (bromoaniline) was beneficial to suppress oligomerization of the bromoaniline.

### 3-(Dimethylamino)-1-(pyridin-3-yl)prop-2-en-1-one (6)

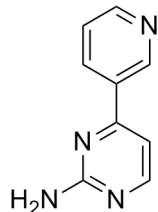

In a 200 mL round-bottom flask equipped with a stirrer bar and reflux condenser were charged acetylpyridine (12.2 mL, 110 mmol), *N,N*-dimethylformamide dimethylacetal (14.9 mL, 110 mmol), and toluene (50 mL). The reaction mixture was heated to reflux for 18 h and then cooled to room temperature. The reaction mixture was concentrated in vacuo, then  $\text{Et}_2\text{O}$  (50 mL) was added. The resulting yellow precipitate was collected by filtration, washed with cold  $\text{Et}_2\text{O}$ -hexanes (1:2) and dried in vacuo to produce 3-(Dimethylamino)-1-(pyridin-3-yl)prop-2-en-1-one (17.7 g, 91%) which was used next step without further purification.

In a 100 mL round-bottom flask equipped with a stirbar and reflux condenser were charged 3-(dimethylamino)-1-(pyridin-3-yl) prop-2-en-1-one (6.4 g, 36.3 mmol), guanidine hydrochloride (3.47 g, 36.3 mmol), NaOH (1.45 g, 36.3 mmol), and *n*BuOH (40 mL). The reaction was heated to reflux for 12 h and then cooled to room temperature. The precipitate that had formed was collected by filtration and was washed with cold water and dried in vacuo to produce the title compound as an off-white solid. (5.3 g, 85%), mp 187-189 °C.  $^1\text{H}$  NMR (400 MHz, *dms**o*-*d*6)  $\delta$  9.23 (dd,  $J = 2.4, 0.8$  Hz, 1H), 8.67 (dd,  $J = 4.8, 1.2$  Hz, 1H), 8.40-8.36 (m, 2H), 7.53-7.48 (m, 1H), 7.20 (d,  $J = 5.2$ , 1H), 6.82 (s, 2H);  $^{13}\text{C}$  NMR (100 MHz, *dms**o*-*d*6)  $\delta$  164.3, 162.1, 159.9, 151.6, 148.4, 134.6, 132.9, 124.2, 106.5; IR (film)  $\nu_{\text{max}}$  3853, 3745, 3152, 2361, 1696, 1649, 1550, 1464, 668  $\text{cm}^{-1}$ .

### Methyl 4-methyl-3-((4-(pyridin-3-yl)pyrimidin-2-yl)amino)benzoate (8)

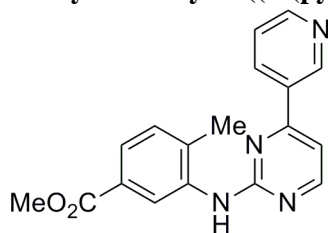

An oven-dried vial was equipped with a magnetic stir bar and charged with **L3** precatalyst (2.4 mg, 0.3 mol%), **6** (172 mg, 1.0 mmol) and  $\text{Cs}_2\text{CO}_3$  (456 mg, 1.4 mmol). The vial was sealed with a screw-cap septum, and then evacuated and backfilled with argon (this process was repeated a total of 3 times). Then, **7** (176  $\mu\text{L}$ , 1.1 mmol) and anhydrous 1,4-dioxane (2.0 mL) were added via syringe to the vial. The reaction mixture was heated at 120 °C for 1.5 h. The reaction solution was cooled to room temperature, diluted with EtOAc, washed with brine, dried over  $\text{MgSO}_4$ , concentrated in vacuo and purified via flash chromatography (EtOAc) to provide the title compound as an off-white solid (304 mg, 95%), mp 117 °C.  $^1\text{H}$  NMR (400 MHz,  $\text{CDCl}_3$ )  $\delta$  9.26 (d,  $J = 1.6$  Hz, 1H), 8.95 (s, 1H), 8.69 (dd,  $J = 4.8, 1.6$  Hz, 1H), 8.47 (d,  $J = 5.2$  Hz, 1H), 8.40-8.35 (m, 1H), 7.67 (dd,  $J = 7.6, 1.6$  Hz, 1H), 7.39 (dd,  $J = 8.0, 5.2$  Hz, 1H), 7.29-7.15 (m, 3H), 3.91 (s, 3H), 2.37 (s, 3H);  $^{13}\text{C}$  NMR (100 MHz,  $\text{CDCl}_3$ )  $\delta$  167.2, 162.6, 160.6, 159.4, 151.7, 148.7, 137.7, 134.7, 133.4, 132.6, 130.6, 128.8, 124.6, 123.8, 122.4, 108.5, 52.3, 18.5; IR (film)

$\nu_{\text{max}}$  3360, 2361, 1711, 1557, 1445, 1414, 1297, 1230, 1110, 1011, 802, 754, 697, 602  $\text{cm}^{-1}$ .

The title compound can also be prepared using  $\text{Pd}_2(\text{dba})_3$  (1 mol%) and XantPhos (2 mol%) instead of **L3** precatalyst to afford the title compound as an off-white solid (1.43 g, 90% yield).

***N*-(3-Bromo-5-(trifluoromethyl)phenyl)-4-methyl-3-((4-(pyridin-3-yl)pyrimidin-2-yl)amino)benzamide (10)**

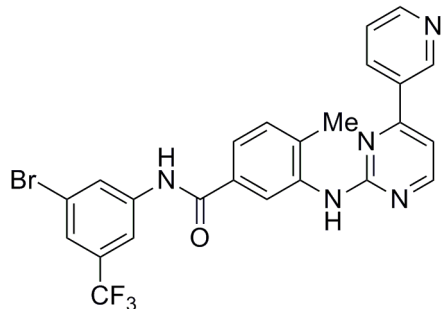

An oven dried round-bottom flask was equipped with a magnetic stir bar and charged with **8** (800 mg, 2.5 mmol), **4** (630 mg, 2.63 mmol). The flask was equipped with a septum, and then evacuated and backfilled with argon (this process was repeated a total of 3 times), then, THF (12 mL) was added. The reaction solution was cooled to 0 °C and  $\text{KO}t\text{Bu}$  (1.55 g, 13.8 mmol) solution in THF (13 mL) was slowly added to the reaction mixture via syringe at 0 °C. After addition of the  $\text{KO}t\text{Bu}$  solution, the reaction was stirred at room temperature for 12 h. Brine (25 mL) was added to the reaction mixture and extracted with EtOAc (60 mL). The organic layer was dried over  $\text{MgSO}_4$ , concentrated in vacuo to a volume of approximately 10 mL. The white precipitate that had formed was collected by filtration, washed with cold  $\text{Et}_2\text{O}$  to afford title compound as a white solid (1.12 g, 85%). mp 217 °C.  $^1\text{H}$  NMR (400 MHz,  $\text{dms-}d_6$ )  $\delta$  10.68 (s, 1H), 9.23 (s, 1H), 9.17 (s, 1H), 8.67 (d,  $J$  = 3.2 Hz, 1H), 8.53 (d,  $J$  = 5.2 Hz, 1H), 8.44-8.38 (m, 2H), 8.34 (s, 1H), 8.27 (s, 1H), 7.79 (d,  $J$  = 7.6 Hz, 1H), 7.62 (s, 1H), 7.54-7.39 (m, 3H), 2.35 (s, 3H);  $^{13}\text{C}$  NMR (100 MHz,  $\text{dms-}d_6$ )  $\delta$  165.8, 161.6, 161.1, 159.6, 151.4, 148.2, 141.6, 138.2, 136.9, 134.3, 132.1, 131.7, 131.1 (q,  $J$  = 32 Hz), 130.4, 126.0, 124.6, 123.8, 123.7, 123.2 (q,  $J$  = 272 Hz), 122.3, 122.2, 115.4, 108.0, 18.3; IR (film)  $\nu_{\text{max}}$  3854, 3747, 3628, 3650, 2361, 1699, 1675, 1652, 1558, 1540, 1456, 1436, 1179, 1125, 804, 668, 418  $\text{cm}^{-1}$ .

**4-Methyl-*N*-(3-(4-methyl-1H-imidazol-1-yl)-5-(trifluoromethyl)phenyl)-3-((4-(pyridin-3-yl)pyrimidin-2-yl)amino)benzamide (9)**

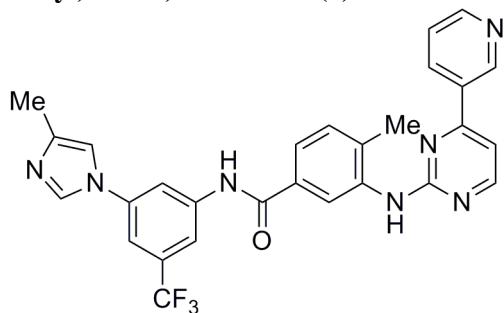

**From **5** and **8**:** An oven-dried vial was equipped with a magnetic stir bar and charged with **5** (120 mg, 0.5 mmol) and **8** (160 mg, 0.5 mmol). The vial was sealed with a screw-cap septum, and then evacuated and backfilled with argon (this process was repeated a total of 3 times), then, THF (3.0 mL) was added. The reaction solution was cooled to 0 °C and  $\text{KO}t\text{Bu}$  (309 mg, 2.75 mmol) solution in THF (3.0 mL) was slowly added to the reaction mixture at 0 °C. After addition of the  $\text{KO}t\text{Bu}$  solution, the reaction was stirred at room temperature for 12 h. Brine (15 mL) was added to the reaction mixture and extracted with EtOAc (25 mL). The organic layer was dried over  $\text{MgSO}_4$ , concentrated in vacuo. Isopropanol (5 mL) was added to the crude product and heated at 60 °C for 2 min, then cooled to room temperature. The white

precipitate that had formed was collected by filtration, washed with cold isopropanol (1<sup>st</sup> crop: 121 mg, 38%). The mother liquid was concentrated *in vacuo* and purified by flash chromatography (CH<sub>2</sub>Cl<sub>2</sub>/MeOH, 15:2) to afford the title compound as a white solid (2<sup>nd</sup> crop: 165 mg, 52%); 90% combined isolated yield.

*From 10*: An oven-dried vial was equipped with a magnetic stir bar and charged with Pd<sub>2</sub>(dba)<sub>3</sub> (2.7 mg, 1.0 mol%) and **L1** (3.2 mg, 2.2 mol%). The vial was sealed with a screw-cap septum, and then evacuated and backfilled with argon (this process was repeated a total of 3 times). Then, anhydrous 1,4-dioxane (0.6 mL) was added via syringe. This dark purple mixture was stirred at 120 °C for 3 min. A second oven-dried vial that was equipped with stir bar was charged with **10** (159 mg, 0.3 mmol), 4-methylimidazole (49 mg, 0.6 mmol) and K<sub>3</sub>PO<sub>4</sub> (153 mg, 1.2 mmol). The vial was sealed with a screw-cap septum, and then evacuated and backfilled with argon (this process was repeated a total of 3 times). Anhydrous 1,4-dioxane (0.6 mL) and then, the premixed catalyst solution were added via syringe to the second vial (total 1.2 mL of 1,4-dioxane). The reaction was heated at 120 °C for 12 h. The reaction mixture was cooled to room temperature, diluted with EtOAc, washed with brine, dried over MgSO<sub>4</sub>, concentrated *in vacuo* and purified via flash chromatography (CH<sub>2</sub>Cl<sub>2</sub>/MeOH, 15:2) to provide the title compound as a white solid (139 mg, 88%).

Mp 225-228 °C. <sup>1</sup>H NMR (400 MHz, dms-*d*<sub>6</sub>) δ 10.65 (s, 1H), 9.29 (s, 1H), 9.19 (s, 1H), 8.67 (d, *J* = 3.6 Hz, 1H), 8.54 (d, *J* = 5.2 Hz, 1H), 8.44 (d, *J* = 8.0 Hz, 1H), 8.37-8.30 (m, 2H), 8.23-8.15 (m, 2H), 8.78 (d, *J* = 7.6 Hz, 1H), 7.71 (s, 1H), 7.53-7.45 (m, 4H), 2.36 (s, 3H), 2.17 (s, 3H); <sup>13</sup>C NMR (100 MHz, dms-*d*<sub>6</sub>) δ 165.7, 161.7, 161.1, 159.6, 151.4, 148.2, 141.2, 138.9, 138.2, 137.9, 136.8, 135.0, 134.3, 132.1, 131.8, 130.8 (q, *J* = 32 Hz), 130.5, 124.3, 123.8, 123.7 (q, *J* = 271 Hz), 123.6, 114.9, 114.3, 114.2, 111.5, 108.0, 18.3, 13.6; IR (film) ν<sub>max</sub> 3853, 3819, 3649, 3628, 3363, 2361, 1734, 1699, 1652, 1617, 1577, 1540, 1494, 1474, 1437, 1399, 1317, 1194, 1165, 1107, 1075, 924, 852, 798, 746, 689, 668, 594, 546 cm<sup>-1</sup>; Anal. Calcd. For C<sub>28</sub>H<sub>22</sub>F<sub>3</sub>N<sub>7</sub>O: C, 63.51; H, 4.19. Found: C, 62.98; H, 4.13.

## Computational Methods

All calculations were carried out with Gaussian03 suite of computational programs.<sup>5</sup> Ground state geometry optimizations were evaluated using B3LYP<sup>6</sup> density functional method. For C, H, and N atoms, the 6-31G(d) basis set was used; while LANL2DZ effective core potentials of Hay and Wadt<sup>7</sup> with double- $\zeta$  basis sets were used for Pd and P atoms. Frequency calculations were performed on all optimized structures to verify that they have no negative frequencies. The Gibbs free energies were calculated at 298.15 K and 1 atm.

## Cartersian Coordinates for all Calculated Complexes:

| Complex B |           |           |           |    |           |           |           |
|-----------|-----------|-----------|-----------|----|-----------|-----------|-----------|
|           |           |           |           | H  | -0.089482 | -0.742606 | 4.456889  |
|           |           |           |           | H  | 1.395769  | -1.401911 | 3.761435  |
|           |           |           |           | H  | 0.716178  | 0.092618  | 3.110615  |
| C         | 1.531468  | -2.517732 | 1.140088  | C  | -0.760367 | -3.069004 | 3.149511  |
| C         | 2.176371  | -2.870997 | -0.046035 | H  | 0.132435  | -3.675915 | 3.338052  |
| C         | 1.573765  | -2.479806 | -1.244724 | H  | -1.270592 | -2.918753 | 4.108642  |
| C         | 0.350111  | -1.808139 | -1.289802 | H  | -1.426645 | -3.644795 | 2.500883  |
| C         | -0.333535 | -1.497404 | -0.066852 | Pd | 0.770462  | 0.865608  | 0.047596  |
| C         | 0.294206  | -1.866260 | 1.167493  | C  | -2.147705 | 2.592949  | -1.390706 |
| H         | 1.996580  | -2.797899 | 2.081625  | C  | -2.032401 | 2.441403  | 1.830160  |
| H         | 2.067574  | -2.717735 | -2.180651 | C  | -3.643926 | 2.874318  | -1.622854 |
| C         | -1.848855 | -1.346638 | -0.088398 | H  | -4.216987 | 1.960252  | -1.793248 |
| C         | -2.589408 | -0.133619 | 0.060653  | H  | -4.109753 | 3.444150  | -0.815597 |
| C         | -2.536277 | -2.584057 | -0.224050 | H  | -3.728340 | 3.482948  | -2.533067 |
| C         | -4.006027 | -0.218827 | 0.139484  | C  | -1.418187 | 3.951759  | -1.305505 |
| C         | -3.943278 | -2.620034 | -0.281765 | H  | -0.349783 | 3.847984  | -1.123241 |
| C         | -4.673954 | -1.446872 | -0.050593 | H  | -1.541498 | 4.469247  | -2.266225 |
| P         | -1.616990 | 1.503483  | 0.138785  | H  | -1.839455 | 4.605094  | -0.538104 |
| C         | -0.392155 | -1.706287 | 2.525358  | C  | -1.642486 | 1.837785  | -2.634182 |
| H         | -1.330147 | -1.170845 | 2.362661  | H  | -1.797077 | 2.466540  | -3.520790 |
| C         | 3.447606  | -3.710103 | 0.017768  | H  | -0.579450 | 1.602976  | -2.569546 |
| H         | 4.005847  | -3.359620 | 0.896288  | H  | -2.197581 | 0.907399  | -2.789155 |
| C         | 4.377255  | -3.572285 | -1.196411 | C  | -3.057779 | 3.598271  | 1.801114  |
| H         | 3.904867  | -3.939980 | -2.116445 | H  | -4.084772 | 3.289737  | 1.603374  |
| H         | 4.687251  | -2.532997 | -1.339117 | H  | -3.061023 | 4.056470  | 2.798695  |
| H         | 5.278024  | -4.176481 | -1.036768 | H  | -2.791422 | 4.385638  | 1.094820  |
| C         | 3.078287  | -5.191185 | 0.257968  | C  | -2.479533 | 1.418282  | 2.891124  |
| H         | 3.983122  | -5.797975 | 0.381938  | H  | -2.621905 | 1.943933  | 3.844665  |
| H         | 2.460143  | -5.315101 | 1.154466  | H  | -3.419737 | 0.922090  | 2.642626  |
| H         | 2.516507  | -5.593897 | -0.594275 | H  | -1.721966 | 0.651207  | 3.055932  |
| C         | -0.231940 | -1.485305 | -2.668499 | C  | -0.700954 | 3.058286  | 2.303241  |
| H         | -1.130446 | -0.883402 | -2.516952 | H  | 0.076241  | 2.298906  | 2.414587  |
| C         | 0.751852  | -0.660879 | -3.523808 | H  | -0.325074 | 3.815332  | 1.611101  |
| H         | 0.259059  | -0.314691 | -4.440234 | H  | -0.856254 | 3.537254  | 3.279409  |
| H         | 1.123053  | 0.211301  | -2.978665 | C  | -1.810011 | -3.922039 | -0.266342 |
| H         | 1.621616  | -1.256305 | -3.823766 | H  | -2.254097 | -4.614932 | 0.457782  |
| C         | -0.655040 | -2.742827 | -3.456199 | H  | -1.891177 | -4.404584 | -1.247101 |
| H         | -0.995348 | -2.459952 | -4.459780 | H  | -0.750710 | -3.844978 | -0.036804 |
| H         | 0.182057  | -3.440737 | -3.572699 | C  | -4.894407 | 0.950583  | 0.484342  |
| H         | -1.474354 | -3.274433 | -2.966485 | H  | -5.697124 | 1.089160  | -0.248058 |
| C         | 0.458162  | -0.890176 | 3.517958  |    |           |           |           |

|                     |           |           |           |    |           |           |           |
|---------------------|-----------|-----------|-----------|----|-----------|-----------|-----------|
| H                   | -5.383406 | 0.791864  | 1.454860  | H  | -1.402609 | 1.172291  | -2.354104 |
| H                   | -4.345206 | 1.876464  | 0.544581  | C  | 3.181510  | 3.934875  | 0.128344  |
| C                   | -6.188402 | -1.482502 | 0.036350  | H  | 3.793976  | 3.613367  | -0.724813 |
| H                   | -6.579693 | -2.499118 | 0.052248  | C  | 4.072121  | 3.862910  | 1.376181  |
| H                   | -6.547749 | -0.989585 | 0.946172  | H  | 3.543398  | 4.197734  | 2.277536  |
| H                   | -6.660026 | -0.961478 | -0.808215 | H  | 4.447122  | 2.847709  | 1.529584  |
| C                   | -4.662218 | -3.929056 | -0.551923 | H  | 4.937227  | 4.523996  | 1.248088  |
| H                   | -5.539198 | -3.779304 | -1.187411 | C  | 2.738371  | 5.390779  | -0.138003 |
| H                   | -4.021985 | -4.650694 | -1.059938 | H  | 3.610435  | 6.049136  | -0.232951 |
| H                   | -5.010988 | -4.404634 | 0.375660  | H  | 2.148661  | 5.471591  | -1.058043 |
| C                   | 1.669148  | 2.661400  | -0.293371 | H  | 2.120965  | 5.765177  | 0.688215  |
| C                   | 2.195152  | 3.445683  | 0.739348  | C  | -0.484251 | 1.556449  | 2.703096  |
| C                   | 1.905687  | 3.054550  | -1.617309 | H  | -1.319294 | 0.873111  | 2.532433  |
| C                   | 2.883534  | 4.630467  | 0.455576  | C  | 0.527453  | 0.844251  | 3.624533  |
| H                   | 2.094430  | 3.134735  | 1.773470  | H  | 0.019844  | 0.448758  | 4.512370  |
| C                   | 2.597479  | 4.237947  | -1.900947 | H  | 1.021160  | 0.013812  | 3.111913  |
| H                   | 1.552812  | 2.447589  | -2.446102 | H  | 1.307123  | 1.530889  | 3.974050  |
| C                   | 3.081519  | 5.036586  | -0.864738 | C  | -1.050383 | 2.789561  | 3.437519  |
| H                   | 3.279382  | 5.226144  | 1.275286  | H  | -1.417760 | 2.501154  | 4.430147  |
| H                   | 2.762536  | 4.525073  | -2.937106 | H  | -0.280725 | 3.557963  | 3.577111  |
| H                   | 3.622899  | 5.953316  | -1.083265 | H  | -1.883610 | 3.240004  | 2.893352  |
| N                   | 2.749512  | 0.304451  | 0.158661  | C  | 0.434313  | 0.969852  | -3.444776 |
| C                   | 4.800857  | -0.084129 | 0.937688  | H  | -0.074786 | 0.784456  | -4.398764 |
| N                   | 4.873478  | -0.151420 | -0.437398 | H  | 1.353346  | 1.524898  | -3.663749 |
| C                   | 3.503064  | 0.207240  | 1.311065  | H  | 0.725704  | 0.007773  | -3.012305 |
| C                   | 3.635790  | 0.102270  | -0.849395 | C  | -0.894068 | 3.091953  | -3.135189 |
| H                   | 3.343942  | 0.141571  | -1.890365 | H  | -0.023017 | 3.737803  | -3.295203 |
| H                   | 3.065737  | 0.334619  | 2.291482  | H  | -1.361456 | 2.914070  | -4.111450 |
| C                   | 6.002311  | -0.310319 | 1.805554  | H  | -1.608483 | 3.640880  | -2.515205 |
| H                   | 6.798764  | 0.410888  | 1.580308  | Pd | 0.848702  | -0.833361 | -0.092094 |
| H                   | 5.747279  | -0.207617 | 2.866776  | C  | -1.803655 | -2.749498 | 1.339424  |
| H                   | 6.430338  | -1.310779 | 1.657196  | C  | -1.823456 | -2.525725 | -1.863987 |
| <b>Complex B-TS</b> |           |           |           | C  | -3.228007 | -3.269186 | 1.608698  |
| C                   | 1.361207  | 2.642169  | -1.047160 | H  | -3.926541 | -2.461974 | 1.841676  |
| C                   | 1.957009  | 3.025387  | 0.156085  | H  | -3.636875 | -3.867007 | 0.790916  |
| C                   | 1.328578  | 2.615463  | 1.334226  | H  | -3.184537 | -3.922550 | 2.490719  |
| C                   | 0.126252  | 1.898179  | 1.341222  | C  | -0.862950 | -3.964583 | 1.184821  |
| C                   | -0.503858 | 1.566327  | 0.103425  | H  | 0.171307  | -3.667884 | 1.011878  |
| C                   | 0.145900  | 1.950158  | -1.108514 | H  | -0.890328 | -4.547233 | 2.115287  |
| H                   | 1.841417  | 2.937886  | -1.976862 | H  | -1.168830 | -4.636182 | 0.378406  |
| H                   | 1.774946  | 2.881876  | 2.286723  | C  | -1.368929 | -1.960537 | 2.587070  |
| C                   | -1.995012 | 1.254653  | 0.081619  | H  | -1.426532 | -2.615715 | 3.466605  |
| C                   | -2.602446 | -0.036136 | -0.053431 | H  | -0.341406 | -1.604294 | 2.495276  |
| C                   | -2.812292 | 2.415555  | 0.176303  | H  | -2.024508 | -1.103089 | 2.769056  |
| C                   | -4.019483 | -0.102536 | -0.116896 | C  | -2.740718 | -3.770583 | -1.838087 |
| C                   | -4.217097 | 2.306721  | 0.203102  | H  | -3.794168 | -3.545486 | -1.666871 |
| C                   | -4.816257 | 1.052348  | 0.028785  | H  | -2.682987 | -4.245205 | -2.826574 |
| P                   | -1.463977 | -1.563202 | -0.174366 | H  | -2.424878 | -4.519529 | -1.110074 |
| C                   | -0.485992 | 1.751649  | -2.488177 | C  | -2.377677 | -1.540134 | -2.909200 |
|                     |           |           |           | H  | -2.480900 | -2.062769 | -3.869743 |
|                     |           |           |           | H  | -3.359167 | -1.143912 | -2.638701 |

|                   |           |           |           |    |           |           |           |
|-------------------|-----------|-----------|-----------|----|-----------|-----------|-----------|
| H                 | -1.703525 | -0.697327 | -3.069256 | C  | 0.486274  | 1.518798  | -0.057380 |
| C                 | -0.441877 | -3.015716 | -2.351678 | C  | -0.040996 | 1.929160  | 1.209694  |
| H                 | 0.262435  | -2.185759 | -2.451784 | H  | -1.610647 | 2.989031  | 2.214485  |
| H                 | 0.003306  | -3.742441 | -1.666804 | H  | -1.869513 | 3.003805  | -2.043259 |
| H                 | -0.556382 | -3.497999 | -3.332480 | C  | 1.963833  | 1.167012  | -0.147003 |
| C                 | -2.225297 | 3.821552  | 0.209376  | C  | 2.535022  | -0.137659 | -0.025870 |
| H                 | -2.674781 | 4.439501  | -0.576914 | C  | 2.807400  | 2.300776  | -0.311189 |
| H                 | -2.430399 | 4.329173  | 1.158913  | C  | 3.952873  | -0.248505 | -0.024126 |
| H                 | -1.148511 | 3.841113  | 0.064800  | C  | 4.201736  | 2.144330  | -0.433510 |
| C                 | -4.776962 | -1.378106 | -0.387166 | C  | 4.771936  | 0.876540  | -0.256086 |
| H                 | -5.524986 | -1.583294 | 0.387147  | P  | 1.357600  | -1.632310 | 0.127283  |
| H                 | -5.324091 | -1.314071 | -1.337261 | C  | 0.721158  | 1.730186  | 2.523529  |
| H                 | -4.122975 | -2.233530 | -0.443153 | H  | 1.601680  | 1.121002  | 2.307548  |
| C                 | -6.325446 | 0.915238  | -0.040572 | C  | -3.097360 | 4.026116  | 0.232817  |
| H                 | -6.835167 | 1.877763  | -0.015897 | H  | -3.727441 | 3.588094  | 1.019111  |
| H                 | -6.639810 | 0.410926  | -0.962076 | C  | -3.963182 | 4.142263  | -1.028919 |
| H                 | -6.718589 | 0.315331  | 0.791120  | H  | -3.413534 | 4.609737  | -1.856488 |
| C                 | -5.085197 | 3.538617  | 0.388270  | H  | -4.335193 | 3.163763  | -1.346824 |
| H                 | -5.883556 | 3.355924  | 1.114406  | H  | -4.829692 | 4.780168  | -0.819276 |
| H                 | -4.520049 | 4.397459  | 0.747773  | C  | -2.648612 | 5.424705  | 0.711488  |
| H                 | -5.568248 | 3.839888  | -0.551479 | H  | -3.519742 | 6.067787  | 0.883663  |
| C                 | 2.319350  | -2.313045 | 0.331331  | H  | -2.074909 | 5.374653  | 1.643668  |
| C                 | 2.592903  | -3.336050 | -0.596857 | H  | -2.016818 | 5.908457  | -0.044168 |
| C                 | 2.491195  | -2.586140 | 1.704382  | C  | 0.300799  | 1.595678  | -2.653714 |
| C                 | 2.945558  | -4.610950 | -0.154301 | H  | 1.157677  | 0.924461  | -2.552885 |
| H                 | 2.521934  | -3.141163 | -1.661291 | C  | -0.762908 | 0.879408  | -3.509197 |
| C                 | 2.846979  | -3.865415 | 2.130804  | H  | -0.326168 | 0.559450  | -4.462807 |
| H                 | 2.338910  | -1.803129 | 2.440174  | H  | -1.162473 | -0.002020 | -3.003004 |
| C                 | 3.070854  | -4.891931 | 1.209495  | H  | -1.605862 | 1.540432  | -3.738997 |
| H                 | 3.130417  | -5.390699 | -0.890012 | C  | 0.786634  | 2.844951  | -3.419637 |
| H                 | 2.952475  | -4.055310 | 3.196645  | H  | 1.076139  | 2.567711  | -4.440471 |
| H                 | 3.356276  | -5.884429 | 1.545552  | H  | -0.005092 | 3.599530  | -3.491891 |
| N                 | 2.961481  | -0.648307 | -0.175872 | H  | 1.653234  | 3.309536  | -2.945056 |
| C                 | 4.677528  | 0.326573  | -1.206615 | C  | -0.105917 | 1.003812  | 3.598774  |
| N                 | 4.755096  | 0.672318  | 0.133903  | H  | 0.512116  | 0.806055  | 4.483221  |
| C                 | 3.591213  | -0.487030 | -1.408487 | H  | -0.958336 | 1.609038  | 3.926771  |
| C                 | 3.729194  | 0.076052  | 0.703204  | H  | -0.498452 | 0.051680  | 3.231454  |
| H                 | 3.503429  | 0.115772  | 1.758882  | C  | 1.234845  | 3.069218  | 3.095448  |
| H                 | 3.219090  | -0.965007 | -2.301774 | H  | 0.403992  | 3.739841  | 3.343322  |
| C                 | 5.686021  | 0.815118  | -2.200025 | H  | 1.804830  | 2.890515  | 4.015352  |
| H                 | 6.700576  | 0.512562  | -1.912308 | H  | 1.887854  | 3.591294  | 2.391745  |
| H                 | 5.482501  | 0.414571  | -3.198974 | Pd | -0.970472 | -0.755892 | 0.100990  |
| H                 | 5.686652  | 1.910720  | -2.267423 | C  | 1.663253  | -2.781830 | -1.427371 |
| <b>Complex B'</b> |           |           |           | C  | 1.753955  | -2.593659 | 1.812231  |
| C                 | -1.219337 | 2.682229  | 1.247457  | C  | 3.104930  | -3.188871 | -1.779588 |
| C                 | -1.885495 | 3.108258  | 0.096508  | H  | 3.743810  | -2.326105 | -1.981040 |
| C                 | -1.363603 | 2.699724  | -1.133760 | H  | 3.574723  | -3.815755 | -1.018509 |
| C                 | -0.208545 | 1.919875  | -1.244095 | H  | 3.063999  | -3.784171 | -2.701496 |
|                   |           |           |           | C  | 0.833973  | -4.075745 | -1.275653 |
|                   |           |           |           | H  | -0.183289 | -3.894580 | -0.933204 |
|                   |           |           |           | H  | 0.766787  | -4.558812 | -2.259349 |

|   |           |           |           |
|---|-----------|-----------|-----------|
| H | 1.310794  | -4.792637 | -0.603668 |
| C | 1.125023  | -1.978428 | -2.625565 |
| H | 1.177498  | -2.602260 | -3.527434 |
| H | 0.086857  | -1.680621 | -2.481246 |
| H | 1.724114  | -1.081298 | -2.808808 |
| C | 2.575442  | -3.901394 | 1.735922  |
| H | 3.595154  | -3.785470 | 1.367618  |
| H | 2.657896  | -4.295411 | 2.757302  |
| H | 2.080176  | -4.670206 | 1.141620  |
| C | 2.434933  | -1.635915 | 2.807881  |
| H | 2.543671  | -2.153761 | 3.769937  |
| H | 3.427880  | -1.315476 | 2.489986  |
| H | 1.832645  | -0.745130 | 2.986212  |
| C | 0.387243  | -2.993501 | 2.402691  |
| H | -0.267448 | -2.129574 | 2.543305  |
| H | -0.135378 | -3.708789 | 1.764550  |
| H | 0.545678  | -3.466310 | 3.381527  |
| C | 2.267253  | 3.725217  | -0.311709 |
| H | 2.795035  | 4.329263  | 0.435556  |
| H | 2.421103  | 4.223273  | -1.275082 |
| H | 1.204946  | 3.784529  | -0.089787 |
| C | 4.696823  | -1.525964 | 0.278967  |
| H | 5.410636  | -1.785088 | -0.510309 |
| H | 5.281516  | -1.420945 | 1.202438  |
| H | 4.033865  | -2.366349 | 0.407115  |
| C | 6.278500  | 0.697244  | -0.269218 |
| H | 6.810769  | 1.642612  | -0.365832 |
| H | 6.633737  | 0.223401  | 0.653512  |
| H | 6.604481  | 0.051725  | -1.095649 |
| C | 5.092858  | 3.340964  | -0.713905 |
| H | 5.830756  | 3.111129  | -1.488879 |
| H | 4.530720  | 4.208014  | -1.058088 |
| H | 5.650908  | 3.650992  | 0.180197  |
| C | -2.028056 | -2.456017 | -0.261094 |
| C | -2.511988 | -3.280915 | 0.760071  |
| C | -2.388719 | -2.750524 | -1.583235 |
| C | -3.282013 | -4.411788 | 0.460928  |
| H | -2.307833 | -3.052575 | 1.799503  |
| C | -3.157888 | -3.879973 | -1.881238 |
| H | -2.081906 | -2.103469 | -2.398919 |
| C | -3.600549 | -4.722568 | -0.860618 |
| H | -3.641774 | -5.040498 | 1.272542  |
| H | -3.419779 | -4.088598 | -2.916081 |
| H | -4.202891 | -5.597260 | -1.091247 |
| N | -2.896772 | 0.005744  | 0.112241  |
| C | -4.986114 | 0.585194  | 0.559367  |
| N | -4.834446 | 0.725096  | -0.800608 |
| C | -3.818828 | 0.130630  | 1.140471  |
| C | -3.580715 | 0.352514  | -1.014878 |
| H | -3.124140 | 0.326418  | -1.993353 |
| C | -3.548017 | -0.167865 | 2.579490  |

|   |           |           |          |
|---|-----------|-----------|----------|
| H | -4.476780 | -0.073560 | 3.153374 |
| H | -3.172547 | -1.187422 | 2.733387 |
| H | -2.816959 | 0.517423  | 3.024051 |
| H | -5.923985 | 0.817052  | 1.051775 |

# **Complex B'-TS**

|   |           |           |           |
|---|-----------|-----------|-----------|
| C | -0.739784 | 2.942611  | 1.193310  |
| C | -1.303921 | 3.461811  | 0.025637  |
| C | -0.839517 | 2.946804  | -1.185999 |
| C | 0.183576  | 1.993511  | -1.261527 |
| C | 0.790737  | 1.517606  | -0.062727 |
| C | 0.301252  | 2.007427  | 1.184237  |
| H | -1.093626 | 3.321163  | 2.149776  |
| H | -1.271781 | 3.313476  | -2.111018 |
| C | 2.175297  | 0.886863  | -0.115862 |
| C | 2.496541  | -0.505081 | 0.003449  |
| C | 3.218595  | 1.843106  | -0.260951 |
| C | 3.869649  | -0.870777 | 0.022527  |
| C | 4.563063  | 1.434439  | -0.361258 |
| C | 4.888567  | 0.084769  | -0.176828 |
| P | 1.068843  | -1.769672 | 0.132342  |
| C | 0.954058  | 1.659613  | 2.523728  |
| H | 1.703623  | 0.886759  | 2.338352  |
| C | -2.313251 | 4.601783  | 0.126817  |
| H | -2.977054 | 4.360251  | 0.968363  |
| C | -3.200292 | 4.792428  | -1.110968 |
| H | -2.612543 | 5.073886  | -1.994248 |
| H | -3.769814 | 3.883933  | -1.326093 |
| H | -3.914233 | 5.604598  | -0.929658 |
| C | -1.579347 | 5.916220  | 0.474780  |
| H | -2.297417 | 6.731751  | 0.623425  |
| H | -0.981997 | 5.818372  | 1.388190  |
| H | -0.901469 | 6.207156  | -0.337513 |
| C | 0.638375  | 1.553569  | -2.656162 |
| H | 1.338728  | 0.724254  | -2.532162 |
| C | -0.541190 | 1.049982  | -3.512054 |
| H | -0.172148 | 0.591615  | -4.437323 |
| H | -1.133786 | 0.305962  | -2.972994 |
| H | -1.211359 | 1.869327  | -3.797407 |
| C | 1.378980  | 2.664566  | -3.429216 |
| H | 1.623905  | 2.320411  | -4.441625 |
| H | 0.759845  | 3.564509  | -3.523586 |
| H | 2.313711  | 2.946883  | -2.939761 |
| C | -0.058762 | 1.105863  | 3.543190  |
| H | 0.452569  | 0.801495  | 4.464808  |
| H | -0.807883 | 1.857271  | 3.816296  |
| H | -0.591723 | 0.239242  | 3.140460  |
| C | 1.698789  | 2.866785  | 3.132538  |
| H | 1.011485  | 3.695845  | 3.337729  |

|    |           |           |           |   |           |           |           |
|----|-----------|-----------|-----------|---|-----------|-----------|-----------|
| H  | 2.171249  | 2.582096  | 4.080768  | H | -2.810015 | -1.241439 | -2.444581 |
| H  | 2.481606  | 3.238165  | 2.465315  | C | -4.000128 | -4.200214 | -1.262468 |
| Pd | -1.091503 | -0.636640 | 0.115674  | H | -4.061954 | -4.750406 | 0.823100  |
| C  | 1.162829  | -2.963219 | -1.409667 | H | -3.798457 | -3.333283 | -3.230222 |
| C  | 1.252133  | -2.813990 | 1.805397  | H | -4.453673 | -5.122162 | -1.614135 |
| C  | 2.450193  | -3.759307 | -1.695328 | N | -3.144381 | -0.043444 | 0.175771  |
| H  | 3.298325  | -3.107404 | -1.916140 | C | -4.638969 | 1.368036  | 0.993152  |
| H  | 2.728860  | -4.445282 | -0.892054 | N | -4.491960 | 1.690784  | -0.340230 |
| H  | 2.272698  | -4.370575 | -2.590549 | C | -3.839702 | 0.308897  | 1.344815  |
| C  | -0.007088 | -3.963013 | -1.289603 | C | -3.601377 | 0.834821  | -0.785555 |
| H  | -0.959924 | -3.466199 | -1.110442 | H | -3.249136 | 0.795682  | -1.804783 |
| H  | -0.092006 | -4.515607 | -2.234683 | C | -3.731643 | -0.366233 | 2.674423  |
| H  | 0.150556  | -4.702886 | -0.500661 | H | -4.105995 | 0.308688  | 3.451459  |
| C  | 0.909340  | -2.069995 | -2.637803 | H | -4.329555 | -1.285502 | 2.728518  |
| H  | 0.824900  | -2.702470 | -3.531732 | H | -2.699238 | -0.624822 | 2.931222  |
| H  | -0.017230 | -1.502379 | -2.536819 | H | -5.319303 | 1.916663  | 1.633637  |
| H  | 1.734754  | -1.370216 | -2.804052 |   |           |           |           |
| C  | 1.885292  | -4.223675 | 1.738932  |   |           |           |           |
| H  | 2.957541  | -4.224506 | 1.540268  |   |           |           |           |
| H  | 1.754183  | -4.694950 | 2.722261  |   |           |           |           |
| H  | 1.398828  | -4.874570 | 1.009962  |   |           |           |           |
| C  | 2.018213  | -1.980238 | 2.848751  |   |           |           |           |
| H  | 2.037945  | -2.532127 | 3.798242  |   |           |           |           |
| H  | 3.051965  | -1.779665 | 2.559161  |   |           |           |           |
| H  | 1.527277  | -1.024466 | 3.039035  |   |           |           |           |
| C  | -0.187485 | -3.017553 | 2.324761  |   |           |           |           |
| H  | -0.709391 | -2.064729 | 2.446626  |   |           |           |           |
| H  | -0.784170 | -3.636719 | 1.650158  |   |           |           |           |
| H  | -0.149222 | -3.519652 | 3.301522  |   |           |           |           |
| C  | 2.954017  | 3.343631  | -0.272634 |   |           |           |           |
| H  | 3.605618  | 3.847646  | 0.450822  |   |           |           |           |
| H  | 3.170263  | 3.792752  | -1.248841 |   |           |           |           |
| H  | 1.927687  | 3.600306  | -0.024456 |   |           |           |           |
| C  | 4.350225  | -2.272811 | 0.303322  |   |           |           |           |
| H  | 5.042031  | -2.632109 | -0.466543 |   |           |           |           |
| H  | 4.896527  | -2.313923 | 1.255351  |   |           |           |           |
| H  | 3.536214  | -2.977104 | 0.363181  |   |           |           |           |
| C  | 6.336705  | -0.368143 | -0.152767 |   |           |           |           |
| H  | 7.035323  | 0.467954  | -0.147985 |   |           |           |           |
| H  | 6.553299  | -0.968052 | 0.738118  |   |           |           |           |
| H  | 6.582959  | -0.997294 | -1.019285 |   |           |           |           |
| C  | 5.654523  | 2.453969  | -0.632340 |   |           |           |           |
| H  | 6.416133  | 2.054051  | -1.307449 |   |           |           |           |
| H  | 5.264490  | 3.360183  | -1.096142 |   |           |           |           |
| H  | 6.167935  | 2.759676  | 0.290300  |   |           |           |           |
| C  | -2.817225 | -1.796829 | -0.343869 |   |           |           |           |
| C  | -3.215653 | -2.797999 | 0.563145  |   |           |           |           |
| C  | -3.066515 | -2.004237 | -1.718178 |   |           |           |           |
| C  | -3.785390 | -3.985670 | 0.100399  |   |           |           |           |
| H  | -3.052786 | -2.669600 | 1.624035  |   |           |           |           |
| C  | -3.635916 | -3.195584 | -2.163624 |   |           |           |           |

## References

- 1) Burgos, C. H.; Barder, T. E.; Huang, H.; Buchwald, S. L. *Angew. Chem. Int. Ed.* **2006**, *45*, 4321.
- 2) Fors, B. P.; Watson, D. A.; Biscoe, M. R.; Buchwald, S. L. *J. Am. Chem. Soc.* **2008**, *130*, 13552.
- 3) Mpamhanga, C. P.; Spinks, D.; Tulloch, L. B.; Shanks, E. J.; Robinson, D. A.; Collie, I. T.; Fairlamb, A. H.; Wyatt, P. G.; Frearson, J. A.; Hunter, W. N.; Gilbert, I. H.; Brenk, R. *J. Med. Chem.* **2009**, *52*, 4454.
- 4) Yuan, J.; Guo, Q.; Zhao, H.; Hu, S.; Whitehouse, D.; Fringle, W.; Mao, J.; Maynard, G.; Hammer, J.; Wustrow, D.; Li, H. WO 2006113704
- 5) Frisch, M. J.; Trucks, G. W.; Schlegel, H. B.; Scuseria, G. E.; Robb, M. A.; Cheeseman, J. R.; Montgomery, Jr., J. A.; Vreven, T.; Kudin, K. N.; Burant, J. C.; Millam, J. M.; Iyengar, S. S.; Tomasi, J.; Barone, V.; Mennucci, B.; Cossi, M.; Scalmani, G.; Rega, N.; Petersson, G. A.; Nakatsuji, H.; Hada, M.; Ehara, M.; Toyota, K.; Fukuda, R.; Hasegawa, J.; Ishida, M.; Nakajima, T.; Honda, Y.; Kitao, O.; Nakai, H.; Klene, M.; Li, X.; Knox, J. E.; Hratchian, H. P.; Cross, J. B.; Bakken, V.; Adamo, C.; Jaramillo, J.; Gomperts, R.; Stratmann, R. E.; Yazyev, O.; Austin, A. J.; Cammi, R.; Pomelli, C.; Ochterski, J. W.; Ayala, P. Y.; Morokuma, K.; Voth, G. A.; Salvador, P.; Dannenberg, J. J.; Zakrzewski, V. G.; Dapprich, S.; Daniels, A. D.; Strain, M. C.; Farkas, O.; Malick, D. K.; Rabuck, A. D.; Raghavachari, K.; Foresman, J. B.; Ortiz, J. V.; Cui, Q.; Baboul, A. G.; Clifford, S.; Cioslowski, J.; Stefanov, B. B.; Liu, G.; Liashenko, A.; Piskorz, P.; Komaromi, I.; Martin, R. L.; Fox, D. J.; Keith, T.; Al-Laham, M. A.; Peng, C. Y.; Nanayakkara, A.; Challacombe, M.; Gill, P. M. W.; Johnson, B.; Chen, W.; Wong, M. W.; Gonzalez, C.; Pople, J. A. *Gaussian 03*, Revision E.01; Gaussian, Inc.: Wallingford CT, 2004.
- 6) (a) Becke, A. D. *J. Chem. Phys.* **1993**, *98*, 1372. (b) Becke, A. D. *J. Chem. Phys.* **1993**, *98*, 5648. (c) Lee, C. T.; Yang, W. T.; Parr, R. G. *Phys. Rev. B* **1988**, *37*, 785–789.
- 7) Hay, P. J.; Wadt, W. R. *J. Chem. Phys.* **1985**, *82*, 299.

SU1-120-1

7.633  
7.630  
7.341  
7.324  
7.322  
7.303  
7.226  
7.207  
7.198  
7.180  
6.882

2.196

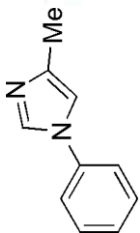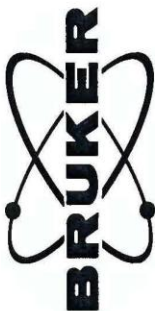

Current Data Parameters  
NAME SU1-120-1  
EXPNO 1  
PROCNO 1

F2 - Acquisition Parameters  
Date\_ 20100829  
Time 13.44  
INSTRUM spect  
PROBHD 5 mm QNP 1H/13  
PULPROG zg30  
TD 65536  
SOLVENT CDCl3  
NS 8  
DS 2  
SWH 8278.146 Hz  
FIDRES 0.126314 Hz  
AQ 3.9584243 sec  
RG 57  
DW 60.400 usec  
DE 6.00 usec  
TE 295.2 K  
D1 1.00000000 sec  
TD0 1

==== CHANNEL f1 =====  
NUC1 1H  
P1 14.00 usec  
PL1 0.00 dB  
SF01 400.1324710 MHz

F2 - Processing parameters  
SI 65536  
SF 400.1300220 MHz  
WDW no  
SSB 0  
LB 0.00 Hz  
GB 0  
PC 1.00

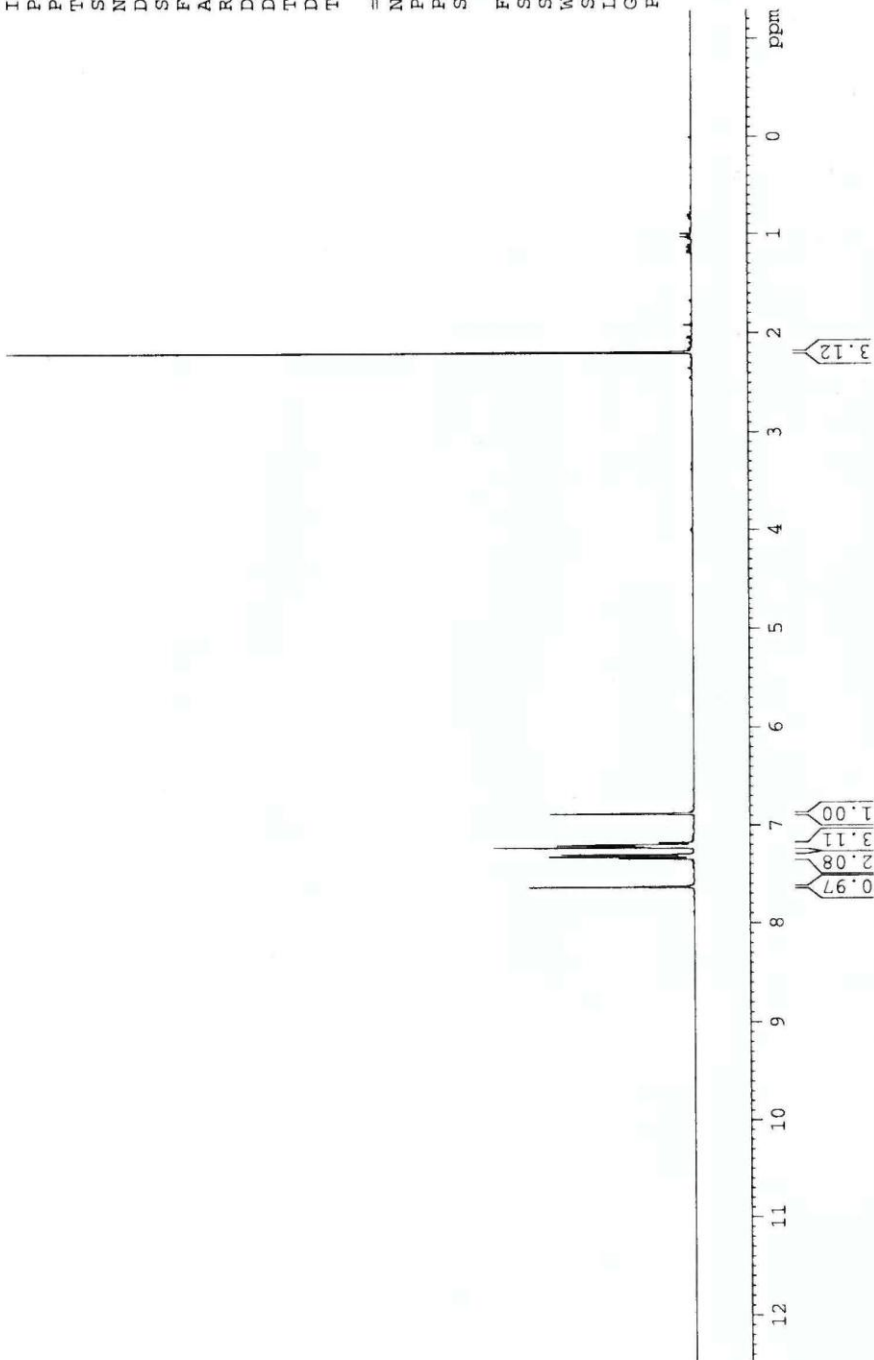

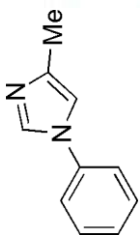

SU1-120-1C

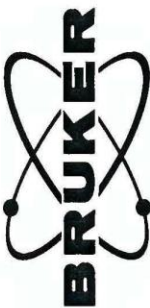

139.44  
137.39  
134.47  
129.72  
126.95  
120.89  
114.46

13.67

Current Data Parameters  
NAME SU1-120-1C  
EXPNO 1  
PROCNO 1

F2 - Acquisition Parameters  
Date\_ 20100829  
Time 13.52  
INSTRUM spect  
PROBHD 5 mm QNP 1H/13  
PULPROG zgpg30  
TD 65536  
SOLVENT CDCl3  
NS 128  
DS 4  
SWH 23980.814 Hz  
FIDRES 0.365918 Hz  
AQ 1.3664756 sec  
RG 4597.6  
DW 20.850 usec  
DE 6.00 usec  
TE 296.2 K  
D1 2.00000000 sec  
d11 0.03000000 sec  
DELTA 1.89999998 sec  
TD0 1

==== CHANNEL f1 =====  
NUC1 13C  
P1 9.38 usec  
PL1 0.00 dB  
SFO1 100.6228298 MHz

==== CHANNEL f2 =====  
CPDPRG2 waltz16  
NUC2 1H  
PCPD2 90.00 usec  
PL2 0.00 dB  
PL12 16.10 dB  
PL13 19.00 dB  
SFO2 400.1316005 MHz

F2 - Processing parameters  
SI 32768  
SF 100.6127723 MHz  
WDW no  
SSB 0  
LB 0.00 Hz  
GB 0  
PC 1.40

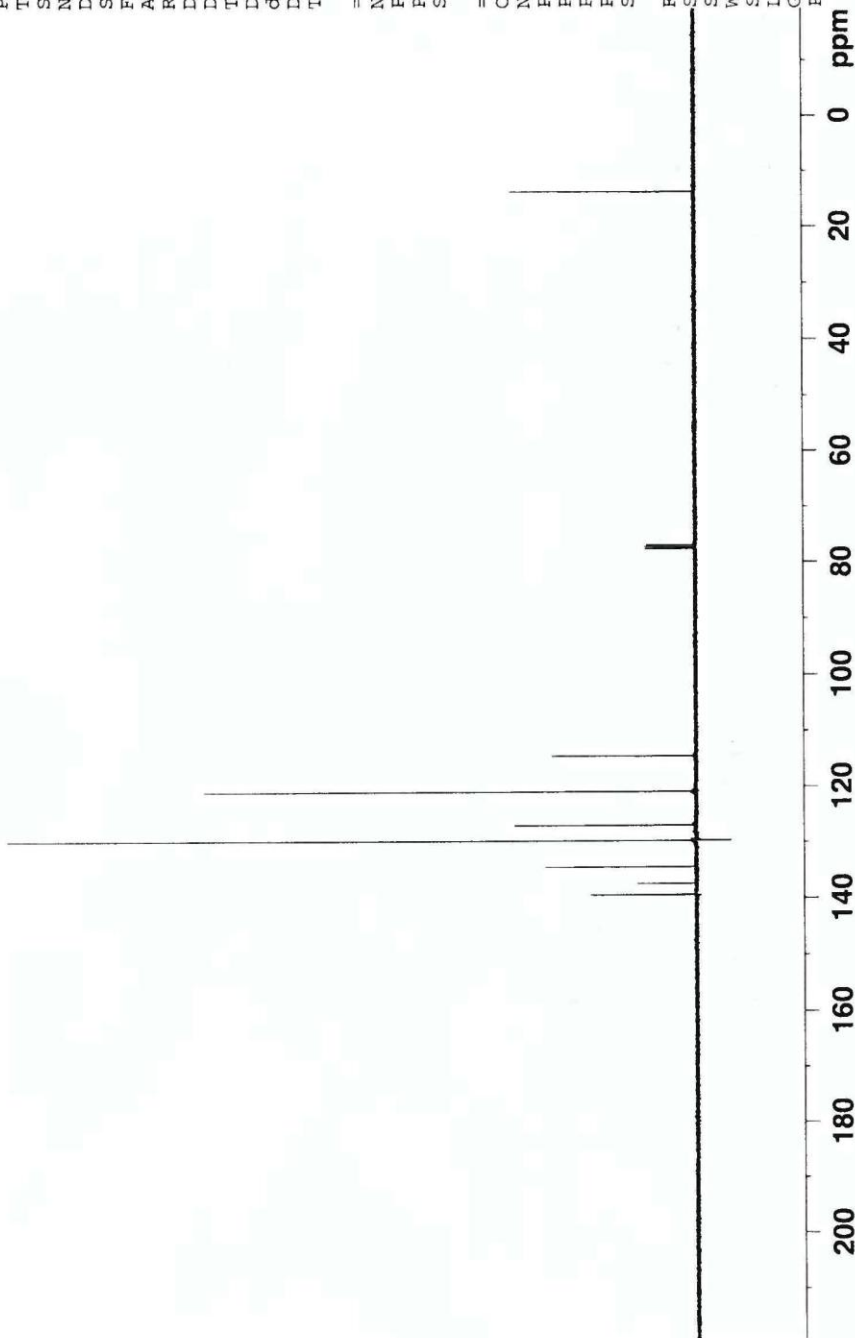

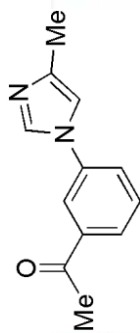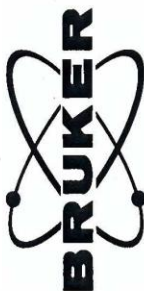

Current Data Parameters  
 NAME SUI-162-4  
 EXPNO 1  
 PROCNO 1

F2 - Acquisition Parameters  
 Date\_ 20101025  
 Time 9.12  
 INSTRUM spect  
 PROBD 5 mm QNP 1H/13  
 PULPROG zg30  
 TD 65536  
 SOLVENT CDCl3  
 NS 16  
 DS 2  
 SWH 8278.146 Hz  
 FIDRES 0.126314 Hz  
 AQ 3.9584243 sec  
 RG 143.7  
 DW 60.400 usec  
 DE 6.00 usec  
 TE 295.2 K  
 DI 1.00000000 sec  
 TD0 1

===== CHANNEL f1 =====  
 NUC1 1H  
 P1 14.00 usec  
 PL1 0.00 dB  
 SFO1 400.1324710 MHz

F2 - Processing parameters  
 SI 65536  
 SF 400.1300099 MHz  
 WDW no  
 SSB 0  
 LB 0.00 Hz  
 GB 0  
 PC 1.00

2.577  
 2.230  
 2.228

7.872  
 7.869  
 7.867  
 7.835  
 7.832  
 7.831  
 7.822  
 7.820  
 7.817  
 7.813  
 7.810  
 7.809  
 7.745  
 7.742  
 7.756  
 7.497  
 7.493  
 7.000  
 6.997  
 6.995  
 6.994

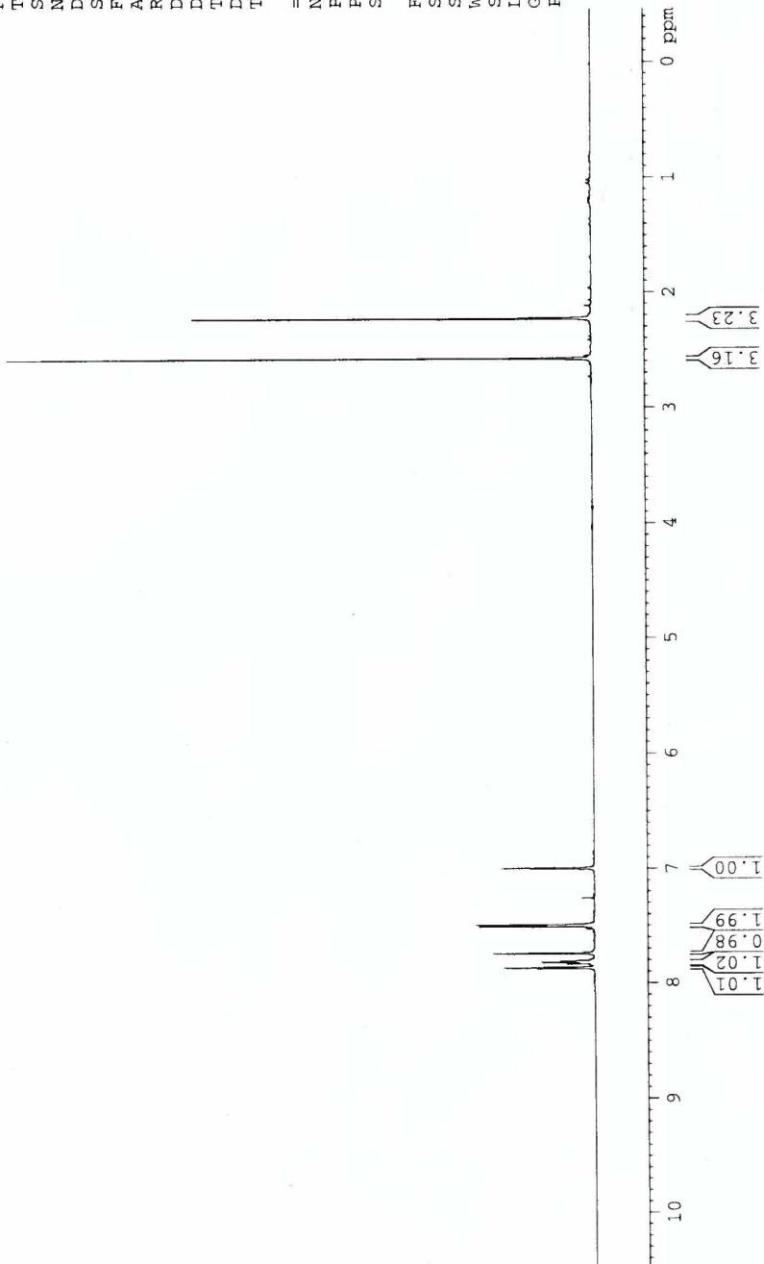

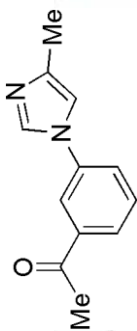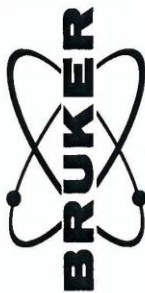

Current Data Parameters  
 NAME SU1-162-4C  
 EXPNO 1  
 PROCNO 1

F2 - Acquisition Parameters  
 Date\_ 20101025  
 Time 9.20  
 INSTRUM spect  
 PROBHD 5 mm QNP 1H/13  
 PULPROG zgpg30  
 TD 65536  
 SOLVENT CDCl3  
 NS 128  
 DS 4  
 SWH 23980.814 Hz  
 FIDRES 0.365918 Hz  
 AQ 1.3664756 sec  
 RG 4096  
 DW 20.850 usec  
 DE 6.00 usec  
 TE 295.2 K  
 D1 2.00000000 sec  
 d11 0.03000000 sec  
 DELTA 1.89999998 sec  
 TDO 1

===== CHANNEL f1 =====  
 NUC1 13C  
 PL 9.38 usec  
 PL1 0.00 dB  
 SFO1 100.6228298 MHz

===== CHANNEL f2 =====  
 CPDPRG2 waltz16  
 NUC2 1H  
 PCPD2 90.00 usec  
 PL2 0.00 dB  
 PL12 16.10 dB  
 PL13 19.00 dB  
 SFO2 400.1316005 MHz

F2 - Processing parameters  
 SI 32768  
 SF 100.6127634 MHz  
 WDW no  
 SSB 0  
 LB 0.00 Hz  
 GB 0  
 PC 1.40

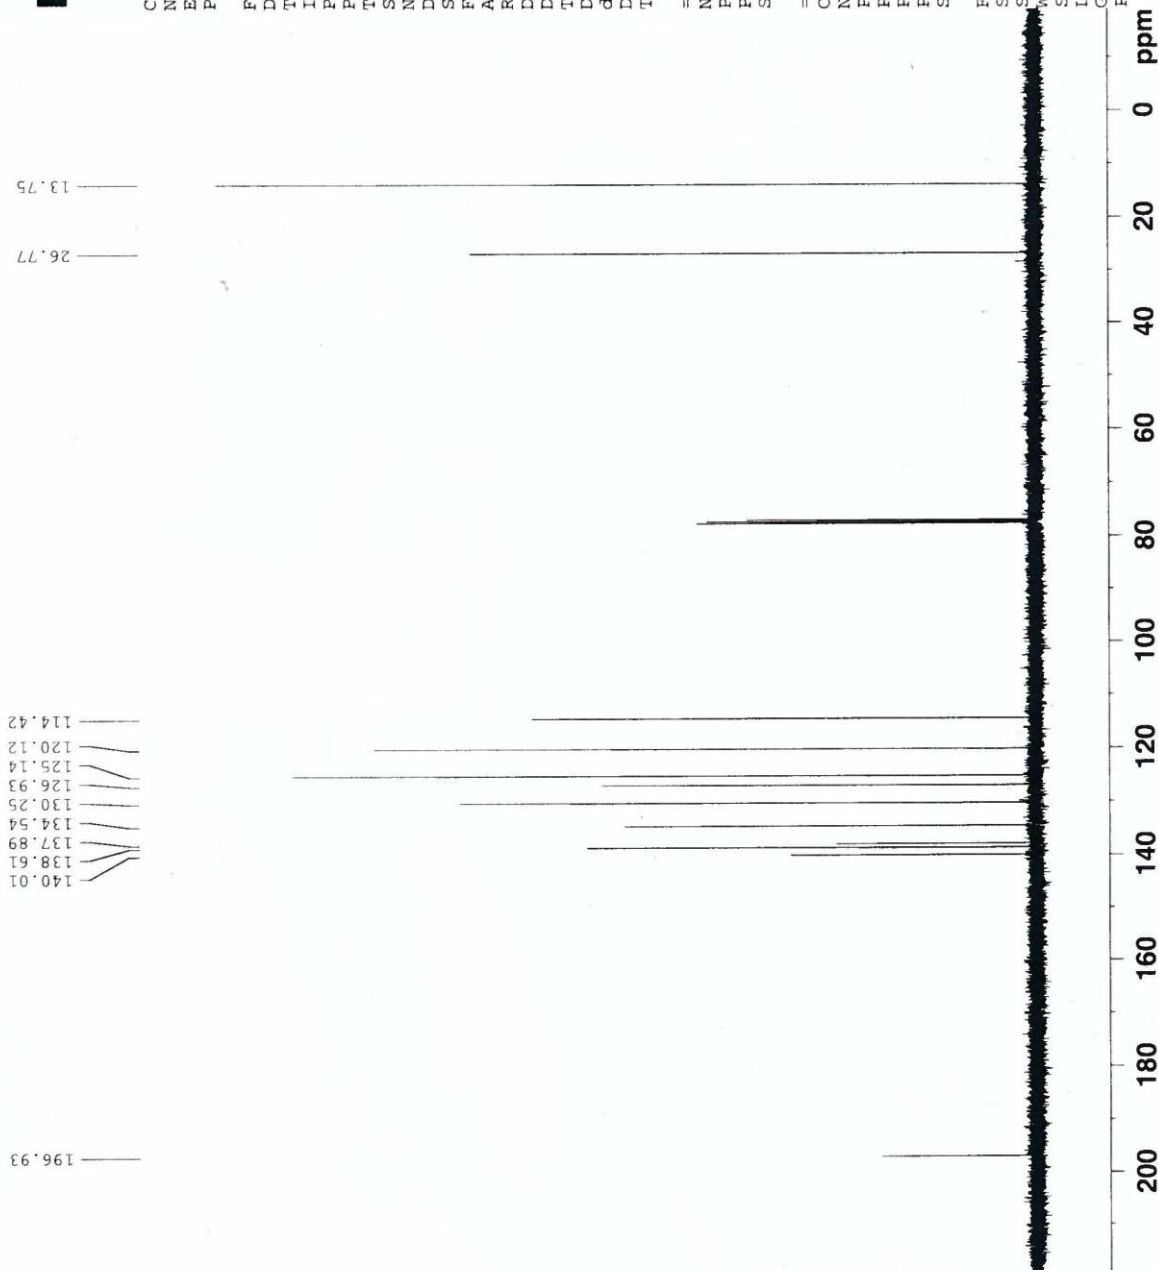

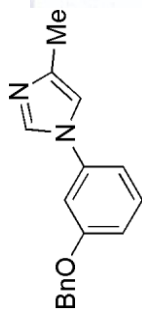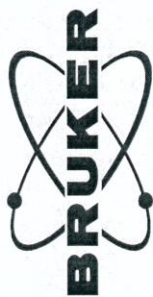

Current Data Parameters  
 NAME SUI-37-6  
 EXPNO 1  
 PROCNO 1

F2 - Acquisition Parameters  
 Date\_ 20100902  
 Time 10.44  
 INSTRUM spect  
 PROBD 5 mm QNP 1H/13  
 PULPROG zg30  
 TD 65536  
 SOLVENT CDCl3  
 NS 8  
 DS 2  
 SWH 8278.146 Hz  
 FIDRES 0.126314 Hz  
 AQ 3.9584243 sec  
 RG 32  
 DW 60.400 usec  
 DE 6.00 usec  
 TE 295.2 K  
 D1 1.00000000 sec  
 TD0 1

===== CHANNEL f1 =====  
 NUC1 1H  
 P1 14.00 usec  
 PL1 0.00 dB  
 SFO1 400.1324710 MHz

F2 - Processing parameters  
 SI 65536  
 SF 400.1300220 MHz  
 WDW no  
 SSB 0  
 LB 0.00 Hz  
 GB 0  
 PC 1.00

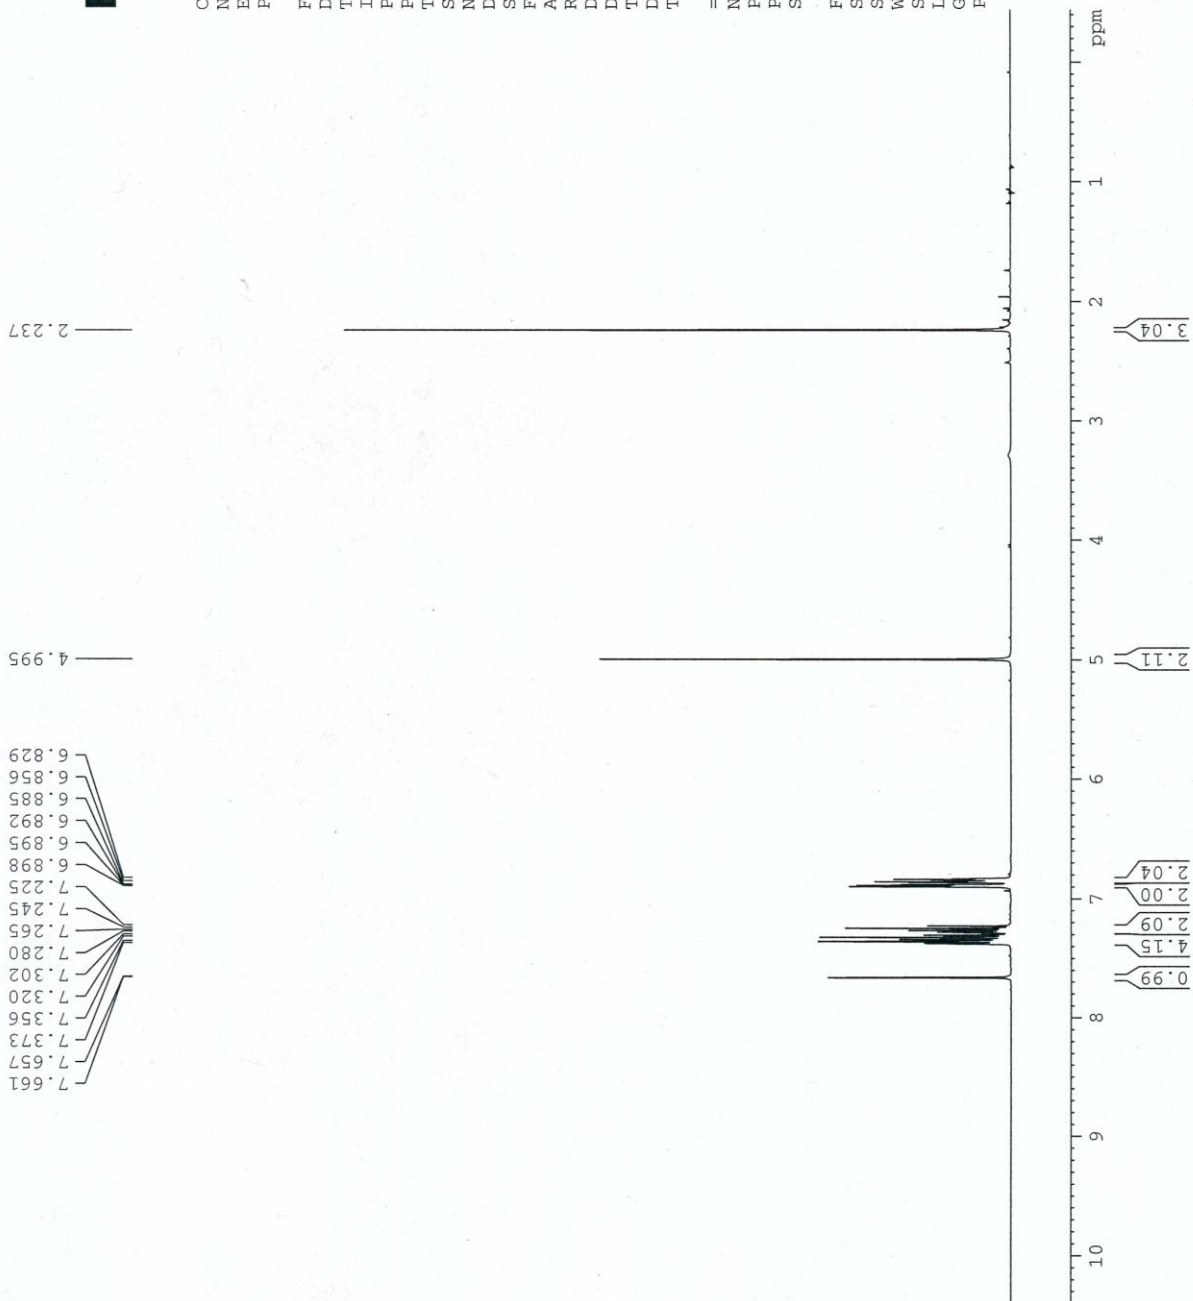

SU1-37-6C

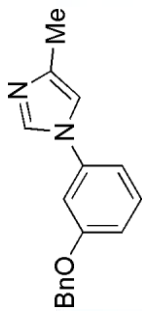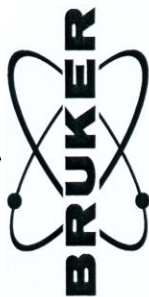

Current Data Parameters  
NAME SU1-37-6C  
EXPNO 1  
PROCNO 1

F2 - Acquisition Parameters  
Date\_ 20100902  
Time 10.53  
INSTRUM spect  
PROBHD 5 mm QNP 1H/13  
PULPROG zgpg30  
TD 65536  
SOLVENT CDCl3  
NS 128  
DS 4  
SWH 23980.814 Hz  
FIDRES 0.365918 Hz  
AQ 1.3664756 sec  
RG 1625.5  
DW 20.850 usec  
DE 6.00 usec  
TE 296.2 K  
D1 2.00000000 sec  
d11 0.03000000 sec  
DELTA 1.89999998 sec  
TD0 1

==== CHANNEL f1 =====  
NUC1 13C  
P1 9.38 usec  
PL1 0.00 dB  
SFO1 100.6228298 MHz

==== CHANNEL f2 =====  
CPDPRG2 waltz16  
NUC2 1H  
PCPD2 90.00 usec  
PL2 0.00 dB  
PL12 16.10 dB  
PL13 19.00 dB  
SFO2 400.1316005 MHz

F2 - Processing parameters  
SI 32768  
SF 100.6127807 MHz  
WDW no  
SSB 0  
LB 0.00 Hz  
GB 0  
FC 1.40

13.65

70.12

107.99  
112.87  
113.22  
114.40  
127.38  
128.10  
128.58  
130.56  
134.44  
136.24  
138.42  
139.34

159.65

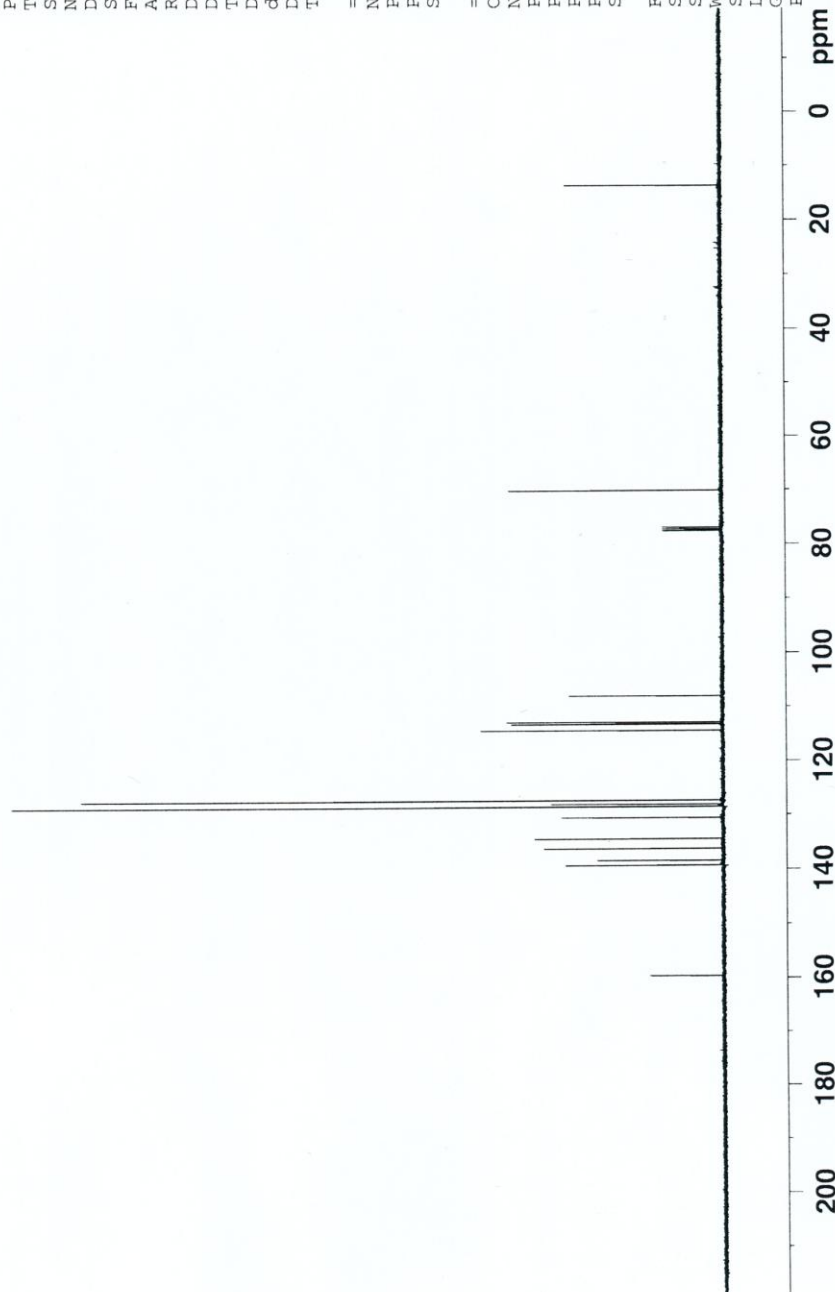

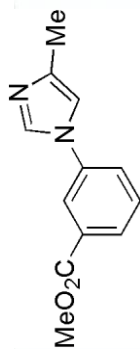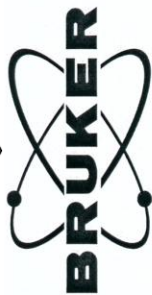

Current Data Parameters  
 NAME SUI-39-7  
 EXPNO 1  
 PROCNO 1

F2 - Acquisition Parameters  
 Date\_ 20100826  
 Time 9.54  
 INSTRUM spect  
 PROBD 5 mm QNP 1H/13  
 PULPROG zg30  
 TD 65536  
 SOLVENT CDC13  
 NS 16  
 DS 2  
 SWH 8278.146 Hz  
 FIDRES 0.126314 Hz  
 AQ 3.9584243 sec  
 RG 57  
 DW 60.400 usec  
 DE 6.00 usec  
 TE 295.2 K  
 D1 1.00000000 sec  
 TD0 1

===== CHANNEL f1 =====  
 NUC1 1H  
 P1 14.00 usec  
 PL1 0.00 dB  
 SFO1 400.1324710 MHz

F2 - Processing parameters  
 SI 65536  
 SF 400.1300098 MHz  
 WDW no  
 SSB 0  
 LB 0.00 Hz  
 GB 0  
 PC 1.00

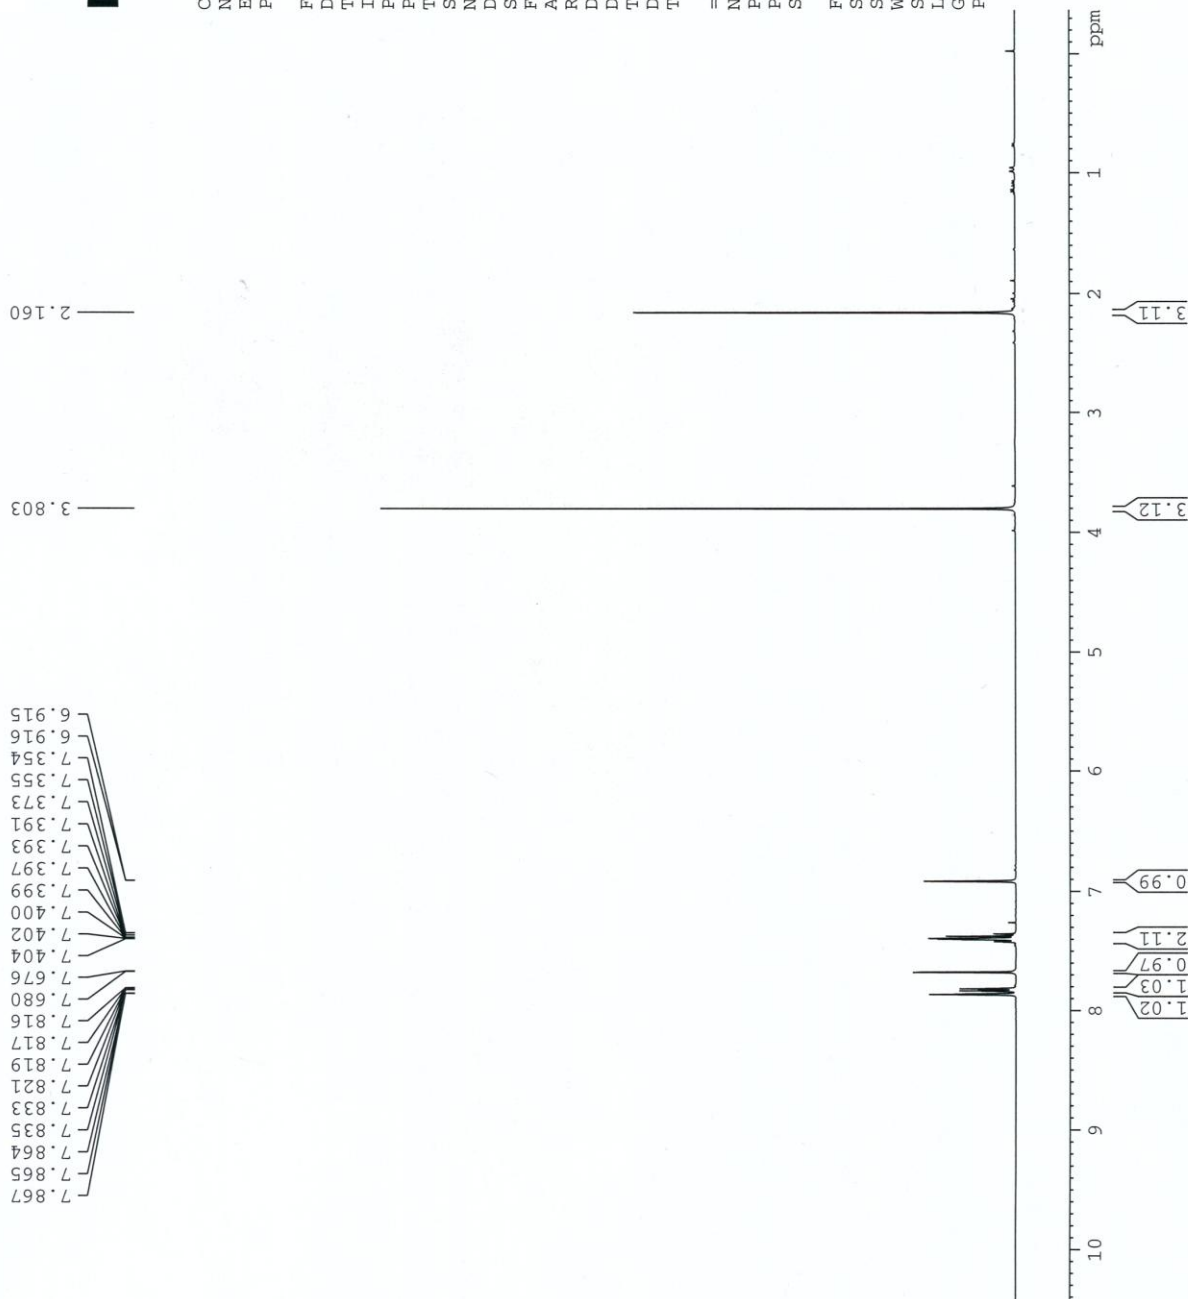

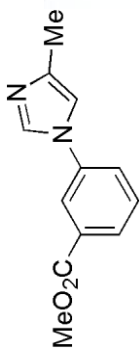

SU1-39-7C

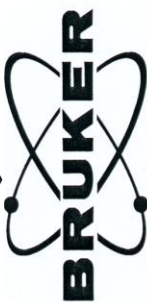

139.78  
137.43  
134.34  
131.75  
129.83  
127.72  
124.72  
121.44  
114.17

165.77

52.33

13.58

Current Data Parameters  
NAME SU1-39-7C  
EXPNO 1  
PROCNO 1

F2 - Acquisition Parameters  
Date\_ 20100826  
Time 10.52  
INSTRUM spect  
PROBHD 5 mm QNP 1H/13  
PULPROG zgpg30  
TD 65336  
SOLVENT CDCl3  
NS 128  
DS 4  
SWH 23980.814 Hz  
FIDRES 0.365918 Hz  
AQ 1.3664756 sec  
RG 1625.5  
DW 20.850 usec  
DE 6.00 usec  
TE 295.2 K  
D1 2.00000000 sec  
d11 0.03000000 sec  
DELTA 1.89999998 sec  
TD0 1

===== CHANNEL f1 =====  
NUC1 13C  
P1 9.38 usec  
PL1 0.00 dB  
SFO1 100.6228298 MHz

===== CHANNEL f2 =====  
CPDPRG2 waltz16  
NUC2 1H  
PCPD2 90.00 usec  
PL2 0.00 dB  
PL12 16.10 dB  
PL13 19.00 dB  
SFO2 400.1316005 MHz

F2 - Processing parameters  
SI 32768  
SF 100.6127725 MHz  
WDW no  
SSB 0  
LB 0.00 Hz  
GB 0  
PC 1.40

ppm

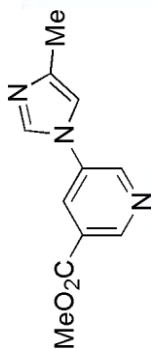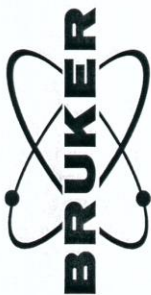

Current Data Parameters  
 NAME SU1-23-23  
 EXPNO 1  
 PROCNO 1

F2 - Acquisition Parameters  
 Date\_ 20100815  
 Time 15.32  
 INSTRUM spect  
 PROBHD 5 mm QNP 1H/13  
 PULPROG zg30  
 TD 65536  
 SOLVENT CDCl3  
 NS 16  
 DS 2  
 SWH 8278.146 Hz  
 FIDRES 0.126314 Hz  
 AQ 3.9584243 sec  
 RG 101.6  
 DW 60.400 usec  
 DE 6.00 usec  
 TE 295.2 K  
 D1 1.00000000 sec  
 TD0 1

===== CHANNEL f1 =====  
 NUC1 1H  
 P1 14.00 usec  
 PL1 0.00 dB  
 SFO1 400.1324710 MHz

F2 - Processing parameters  
 SI 65536  
 SF 400.1300095 MHz  
 WDW no  
 SSB 0  
 LB 0.00 Hz  
 GB 0  
 PC 1.00

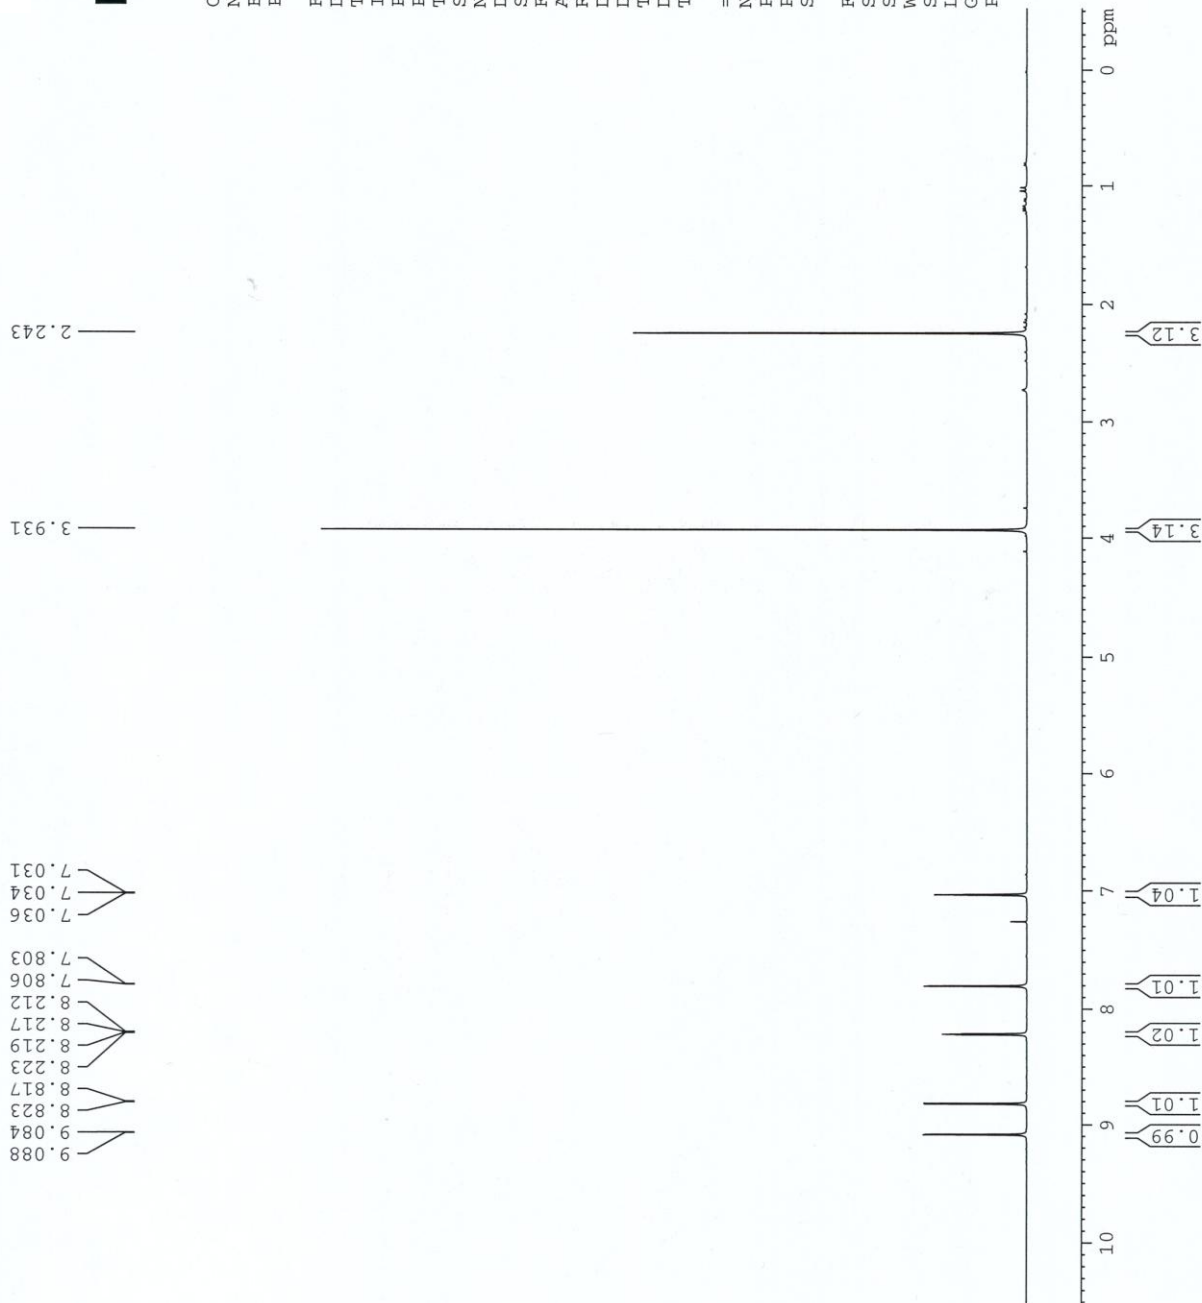

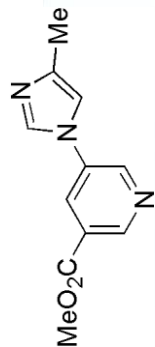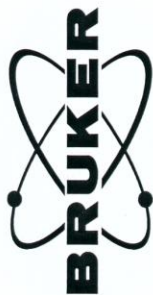

SU1-23-23C

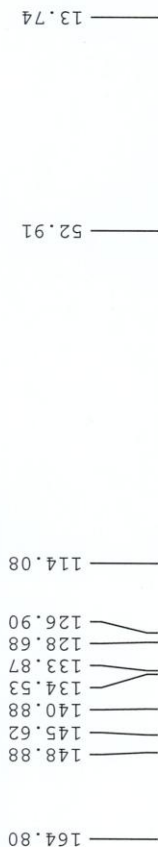

Current Data Parameters  
 NAME SU1-23-23C  
 EXPNO 1  
 PROCNO 1  
 F2 - Acquisition Parameters  
 Date\_ 20100815  
 Time 15.43  
 INSTRUM spect  
 PROBHD 5 mm QNP 1H/13  
 PULPROG zgpg30  
 TD 65536  
 SOLVENT CDCl3  
 NS 128  
 DS 4  
 SWH 23980.814 Hz  
 FIDRES 0.365918 Hz  
 AQ 1.3664756 sec  
 RG 1625.5  
 DW 20.850 usec  
 DE 6.00 usec  
 TE 295.2 K  
 D1 2.00000000 sec  
 d11 0.03000000 sec  
 DELTA 1.89999998 sec  
 TD0 1

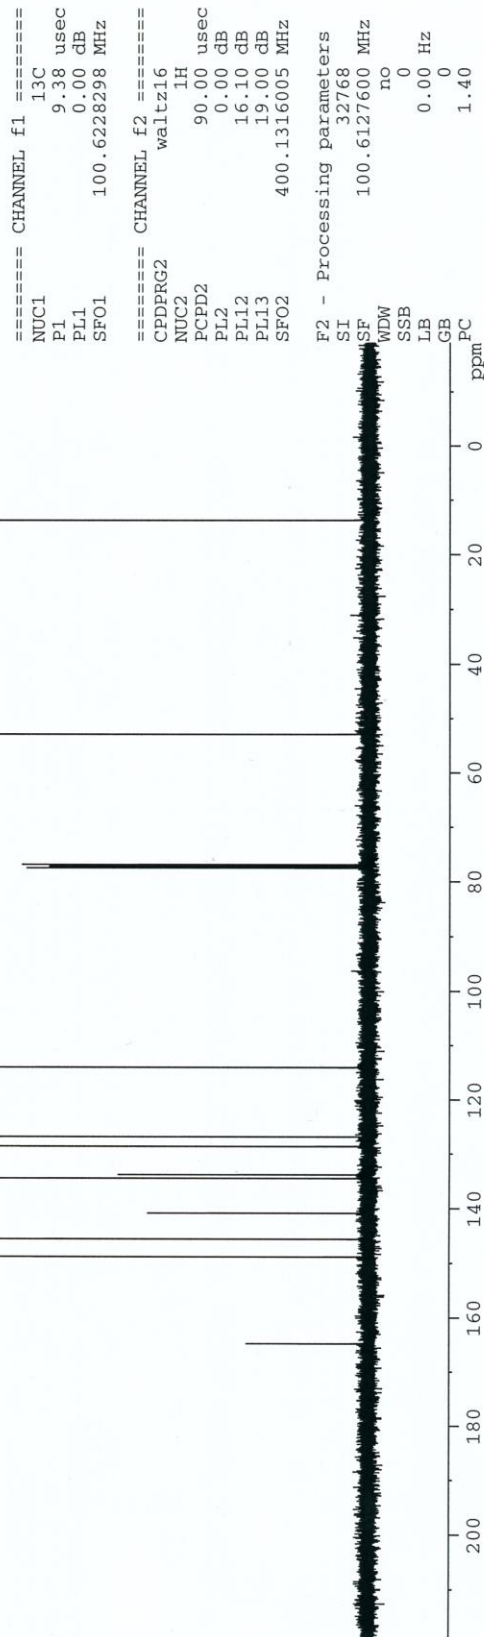

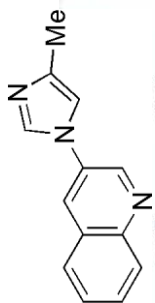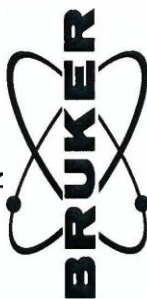

Current Data Parameters  
 NAME SUI-162-2  
 EXPNO 1  
 PROCNO 1

F2 - Acquisition Parameters  
 Date\_ 20101025  
 Time 9.26  
 INSTRUM spect  
 PROHD 5 mm QNP 1H/13  
 PULPROG zg30  
 TD 65536  
 SOLVENT CDCl3  
 NS 16  
 DS 2  
 SWH 8278.146 Hz  
 FIDRES 0.126314 Hz  
 AQ 3.9584243 sec  
 RG 90.5  
 DW 60.400 usec  
 DE 6.00 usec  
 TE 295.2 K  
 D1 1.00000000 sec  
 TD0 1

==== CHANNEL f1 =====  
 NUC1 1H  
 P1 14.00 usec  
 PL1 0.00 dB  
 SF01 400.1324710 MHz

F2 - Processing parameters  
 SI 65536  
 SF 400.1300101 MHz  
 WDW no  
 SSB 0  
 LB 0.00 Hz  
 GB 0  
 PC 1.00

8.826  
 8.820  
 7.988  
 7.967  
 7.872  
 7.867  
 7.752  
 7.750  
 7.686  
 7.666  
 7.592  
 7.589  
 7.571  
 7.553  
 7.551  
 7.469  
 7.451  
 7.433  
 6.981

2.207

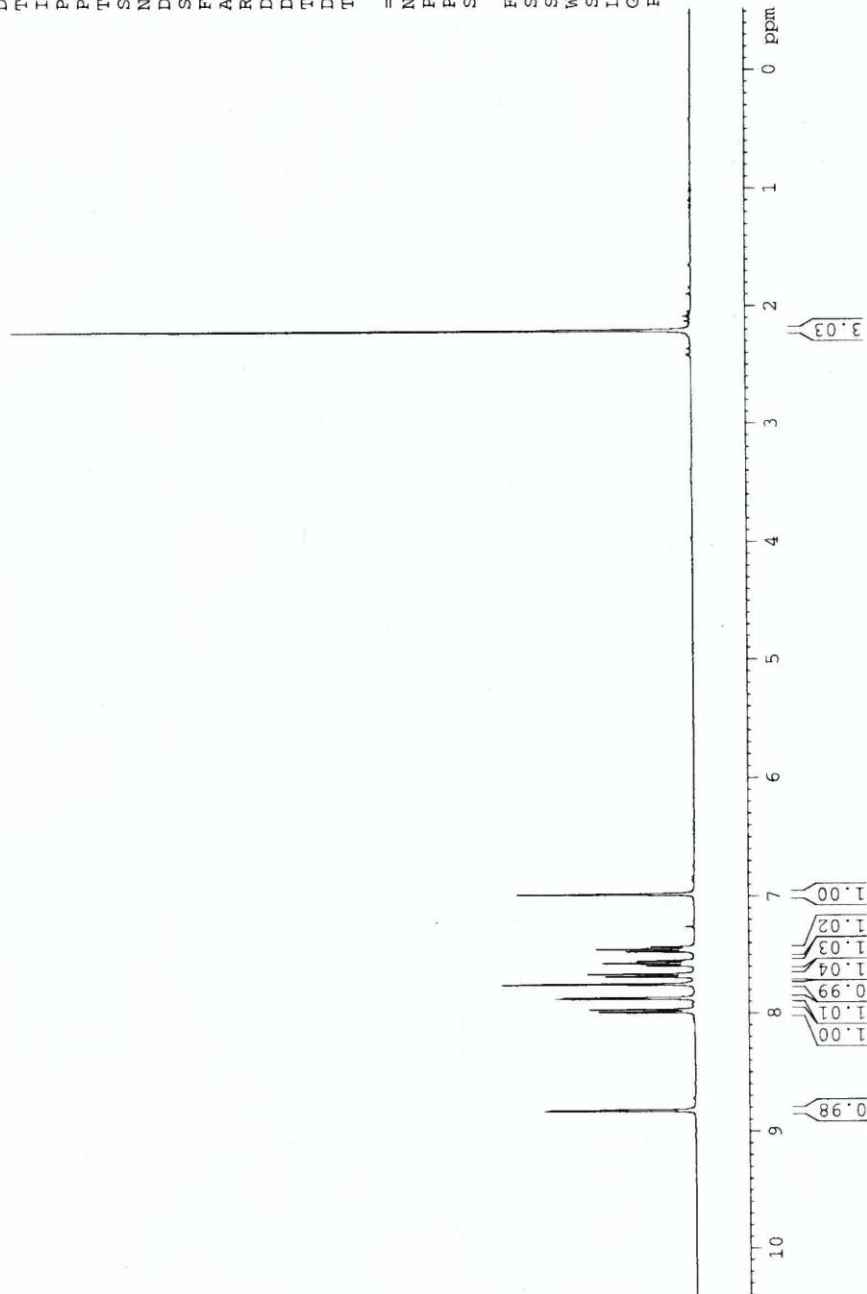

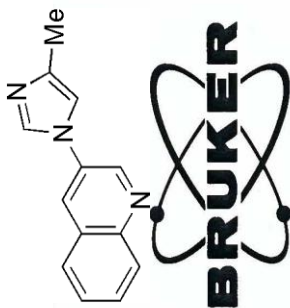

Current Data Parameters  
 NAME SU1-162-2C  
 EXPNO 1  
 PROCNO 1

F2 - Acquisition Parameters  
 Date\_ 20101025  
 Time 9.35  
 INSTRUM spect  
 PROBD 5 mm QNP 1H/13  
 PULPROG zgpg30  
 TD 65536  
 SOLVENT CDCl3  
 NS 128  
 DS 4  
 SWH 23980.814 Hz  
 FIDRES 0.365918 Hz  
 AQ 1.3664756 sec  
 RG 4096  
 DW 20.850 usec  
 DE 6.00 usec  
 TE 295.2 K  
 D1 2.00000000 sec  
 d11 0.03000000 sec  
 DELTA 1.89999998 sec  
 TD0 1

===== CHANNEL f1 =====  
 NUC1 13C  
 P1 9.38 usec  
 PL1 0.00 dB  
 SF01 100.6228298 MHz

===== CHANNEL f2 =====  
 CPDPRG2 waltz16  
 NUC2 1H  
 PCPD2 90.00 usec  
 PL2 0.00 dB  
 PL12 16.10 dB  
 PL13 19.00 dB  
 SFO2 400.1316005 MHz

F2 - Processing parameters  
 SI 32768  
 SF 100.6127766 MHz  
 WDW no  
 SSB 0  
 LB 0.00 Hz  
 GB 0  
 PC 1.40

13.62

146.66  
 144.02  
 140.19  
 134.62  
 130.59  
 129.54  
 129.28  
 127.84  
 127.47  
 127.44  
 125.57  
 114.33

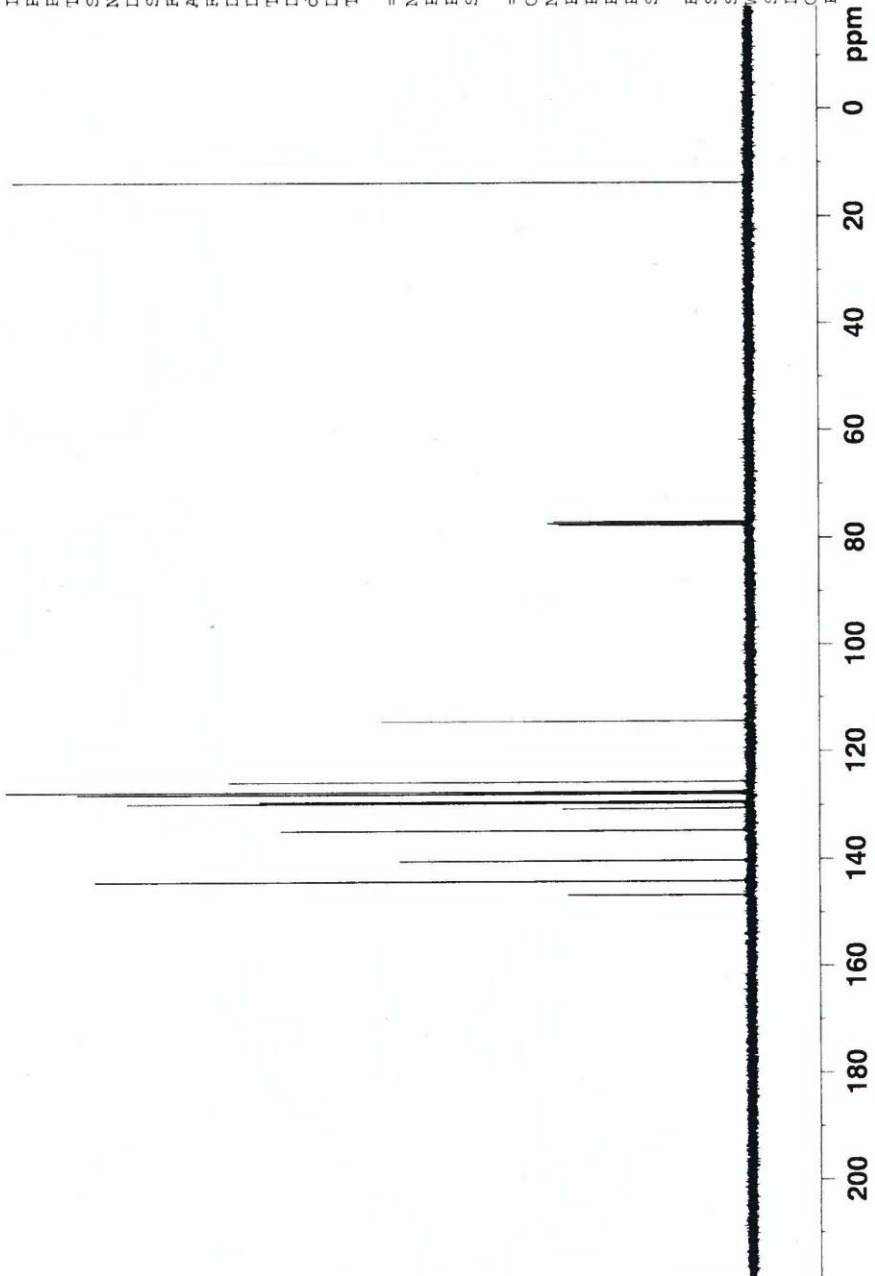

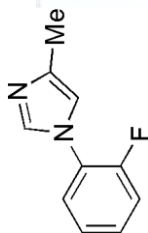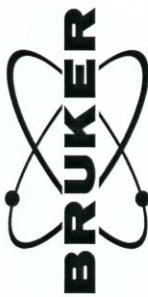

SU1-22-11

7.568  
7.564  
7.560  
7.231  
7.217  
7.213  
7.199  
7.198  
7.193  
7.174  
7.145  
7.133  
7.128  
7.099  
7.096  
7.083  
7.068  
7.066  
7.047  
6.822

2.151

Current Data Parameters  
 NAME SU1-22-11  
 EXPNO 1  
 PROCNO 1

F2 - Acquisition Parameters  
 Date\_ 20100818  
 Time 9.23  
 INSTRUM spect  
 PROBD 5 mm QNP 1H/13  
 PULPROG zg30  
 TD 65536  
 SOLVENT CDC13  
 NS 16  
 DS 2  
 SWH 8278.146 Hz  
 FIDRES 0.126314 Hz  
 AQ 3.9584243 sec  
 RG 57  
 DW 60.400 usec  
 DE 6.00 usec  
 TE 295.2 K  
 D1 1.00000000 sec  
 TD0 1

==== CHANNEL f1 =====  
 NUC1 1H  
 P1 14.00 usec  
 PL1 0.00 dB  
 SFO1 400.1324710 MHz

F2 - Processing parameters  
 SI 65536  
 SF 400.1300220 MHz  
 WDW no  
 SSB 0  
 LB 0.00 Hz  
 GB 0  
 PC 1.00

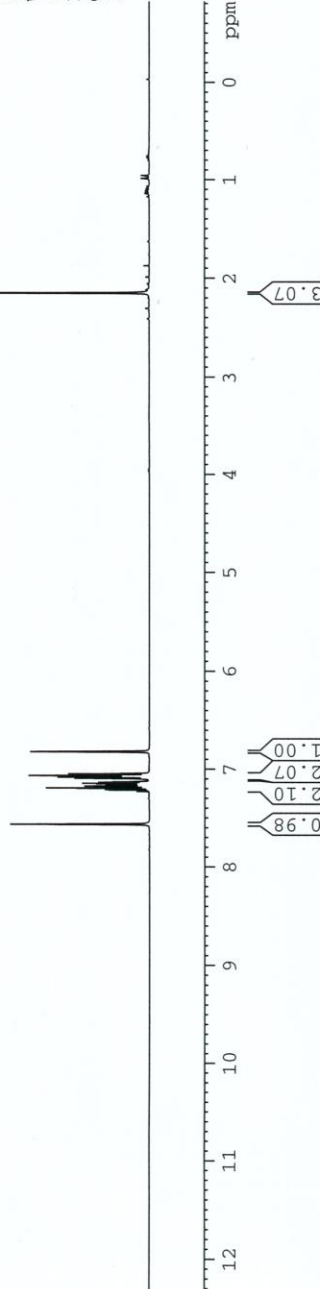

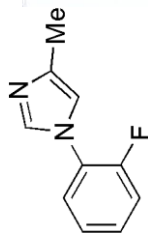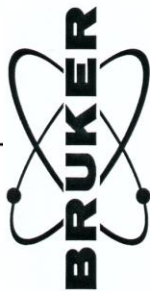

SU1-22-11C

155.87  
153.38  
138.71  
136.11  
136.06  
128.45  
128.37  
125.49  
125.38  
124.93  
124.90  
124.61  
117.12  
116.91  
115.74  
115.71

13.50

Current Data Parameters  
NAME SU1-22-11C  
EXPNO 1  
PROCNO 1

F2 - Acquisition Parameters  
Date\_ 20100818  
Time 9.31  
INSTRUM spect  
PROBHD 5 mm QNP 1H/13  
PULPROG zgpg30  
TD 65536  
SOLVENT CDCl3  
NS 128  
DS 4  
SWH 23980.814 Hz  
FIDRES 0.365918 Hz  
AQ 1.3664756 sec  
RG 2580.3  
DW 20.850 usec  
DE 6.00 usec  
TE 295.2 K  
D1 2.00000000 sec  
d11 0.03000000 sec  
DELTA 1.89999998 sec  
TDO 1

===== CHANNEL f1 =====  
NUC1 13C  
P1 9.38 usec  
PL1 0.00 dB  
SFO1 100.6228298 MHz

===== CHANNEL f2 =====  
CPDPRG2 waltz16  
NUC2 1H  
PCPD2 90.00 usec  
PL2 0.00 dB  
PL12 16.10 dB  
PL13 19.00 dB  
SFO2 400.1316005 MHz

F2 - Processing parameters  
SI 32768  
SF 100.6127729 MHz  
WDW no  
SSB 0  
LB 0.00 Hz  
GB 0  
PC 1.40

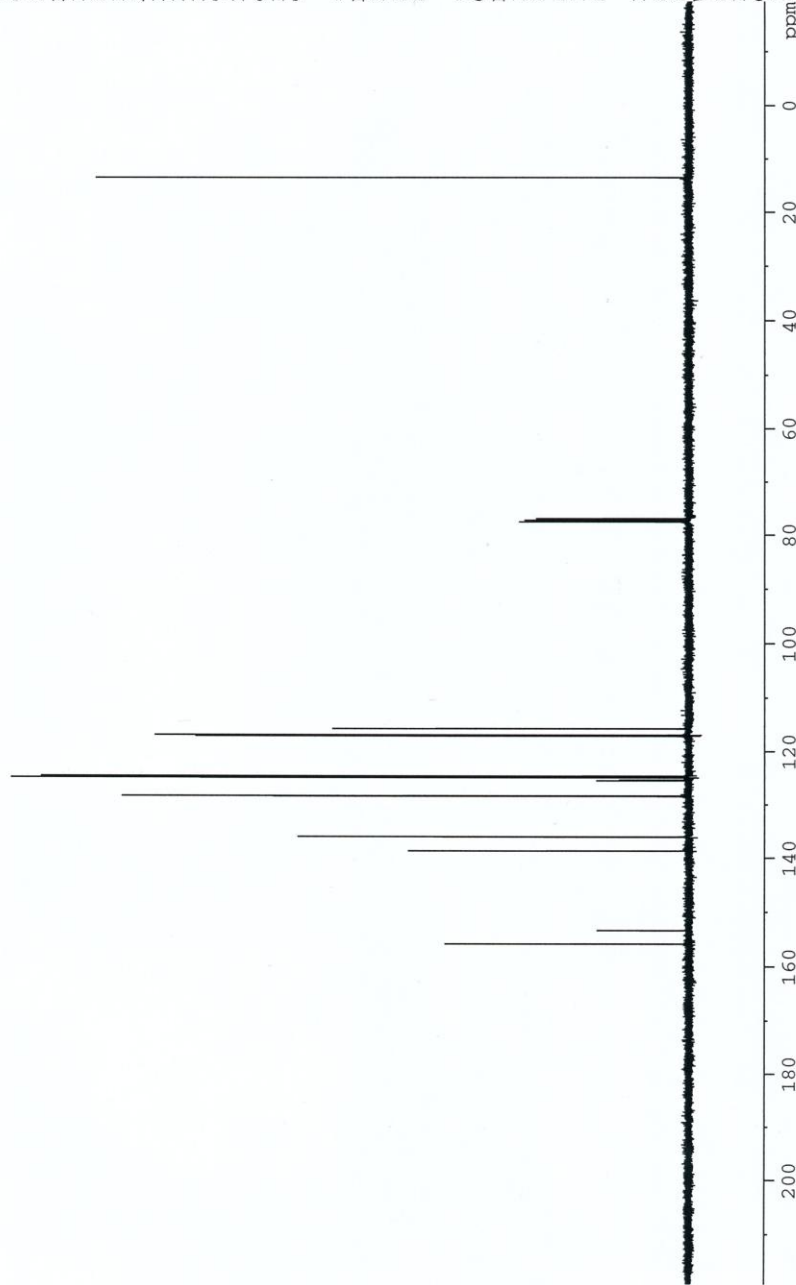

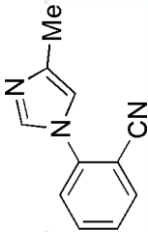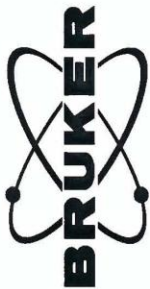

Current Data Parameters  
 NAME SUI-48-4  
 EXPNO 1  
 PROCNO 1

F2 - Acquisition Parameters  
 Date\_ 20100813  
 Time 9.01

INSTRUM spect  
 PROBHD 5 mm QNP 1H/13  
 PULPROG zg30  
 TD 65536  
 SOLVENT CDCl3  
 NS 8  
 DS 2  
 SWH 8278.146 Hz  
 FIDRES 0.126314 Hz  
 AQ 3.9584243 sec  
 RG 90.5  
 DW 60.400 usec  
 DE 6.00 usec  
 TE 295.2 K  
 D1 1.00000000 sec  
 TD0 1

==== CHANNEL f1 =====  
 NUC1 1H  
 P1 14.00 usec  
 PL1 0.00 dB  
 SFO1 400.1324710 MHz

F2 - Processing parameters  
 SI 65536  
 SF 400.1300100 MHz  
 WDW no  
 SSB 0  
 LB 0.00 Hz  
 GB 0  
 PC 1.00

7.739  
7.736  
7.720  
7.716  
7.694  
7.691  
7.680  
7.676  
7.660  
7.656  
7.640  
7.637  
7.452  
7.450  
7.433  
7.431  
7.414  
7.411  
7.379  
7.359  
7.011

2.227

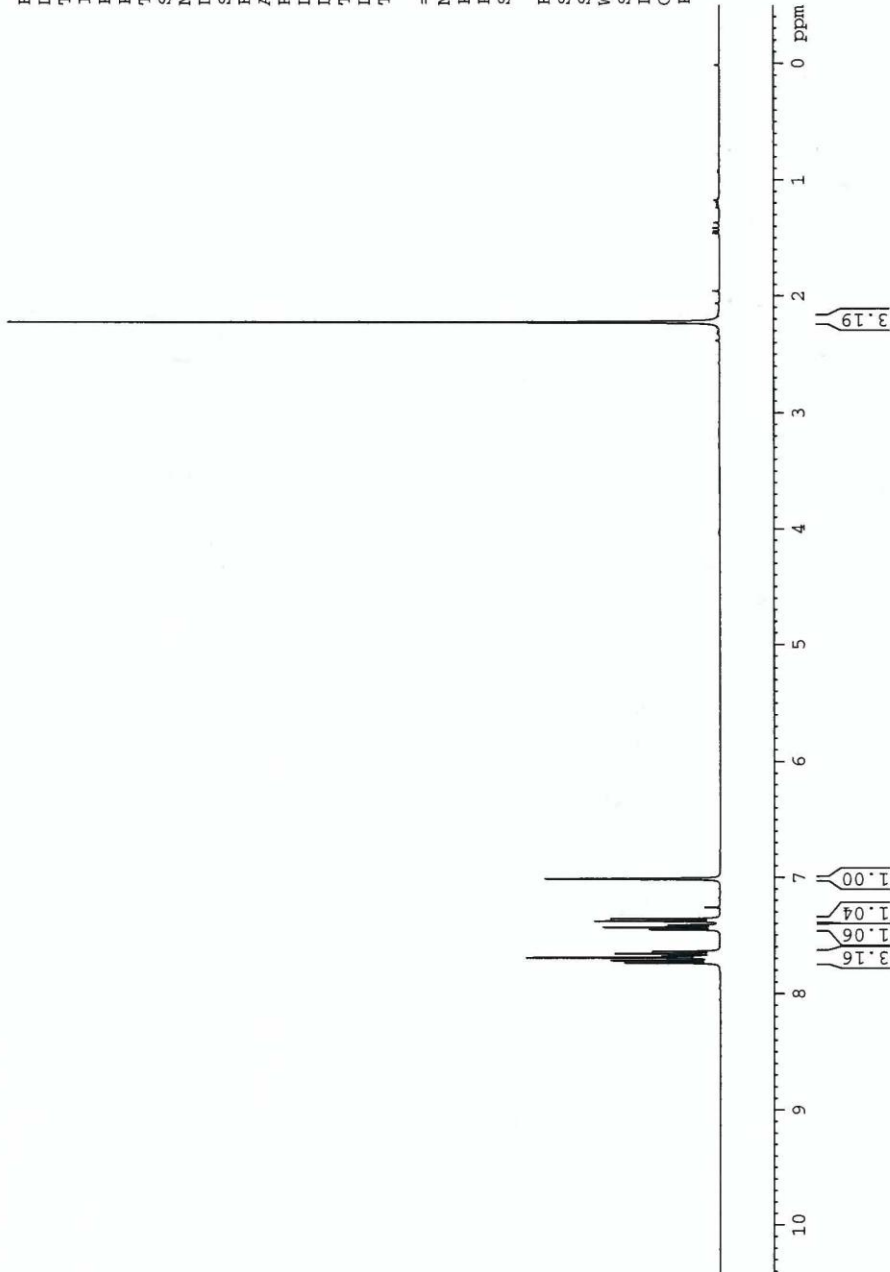

SU1-48-4

139.80  
139.39  
135.82  
134.51  
134.38  
128.11  
125.35  
116.11  
115.92  
107.46

13.65

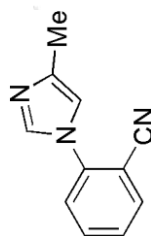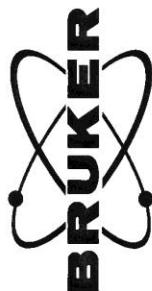

Current Data Parameters  
NAME SU1-48-4C  
EXPNO 2  
PROCNO 2

F2 - Acquisition Parameters  
Date\_ 20100815  
Time 14.43  
INSTRUM spect  
PROBHD 5 mm QNP 1H/13  
PULPROG zgpg30  
TD 65536  
SOLVENT CDC13  
NS 128  
DS 4  
SWH 23980.814 Hz  
FIDRES 0.365918 Hz  
AQ 1.3664756 sec  
RG 7298.2  
DW 20.850 usec  
DE 6.00 usec  
TE 295.2 K  
D1 2.00000000 sec  
d11 0.03000000 sec  
DELTA 1.89999998 sec  
TD0 1

===== CHANNEL f1 =====  
NUC1 13C  
P1 9.38 usec  
PL1 0.00 dB  
SFO1 100.6228298 MHz

===== CHANNEL f2 =====  
CPDPRG2 waltz16  
NUC2 1H  
PCPD2 90.00 usec  
PL2 0.00 dB  
PL12 16.10 dB  
PL13 19.00 dB  
SFO2 400.1316005 MHz

F2 - Processing parameters  
SI 32768  
SF 100.6127678 MHz  
WDW no  
SSB 0  
LB 0.00 Hz  
GB 0  
PC 1.40

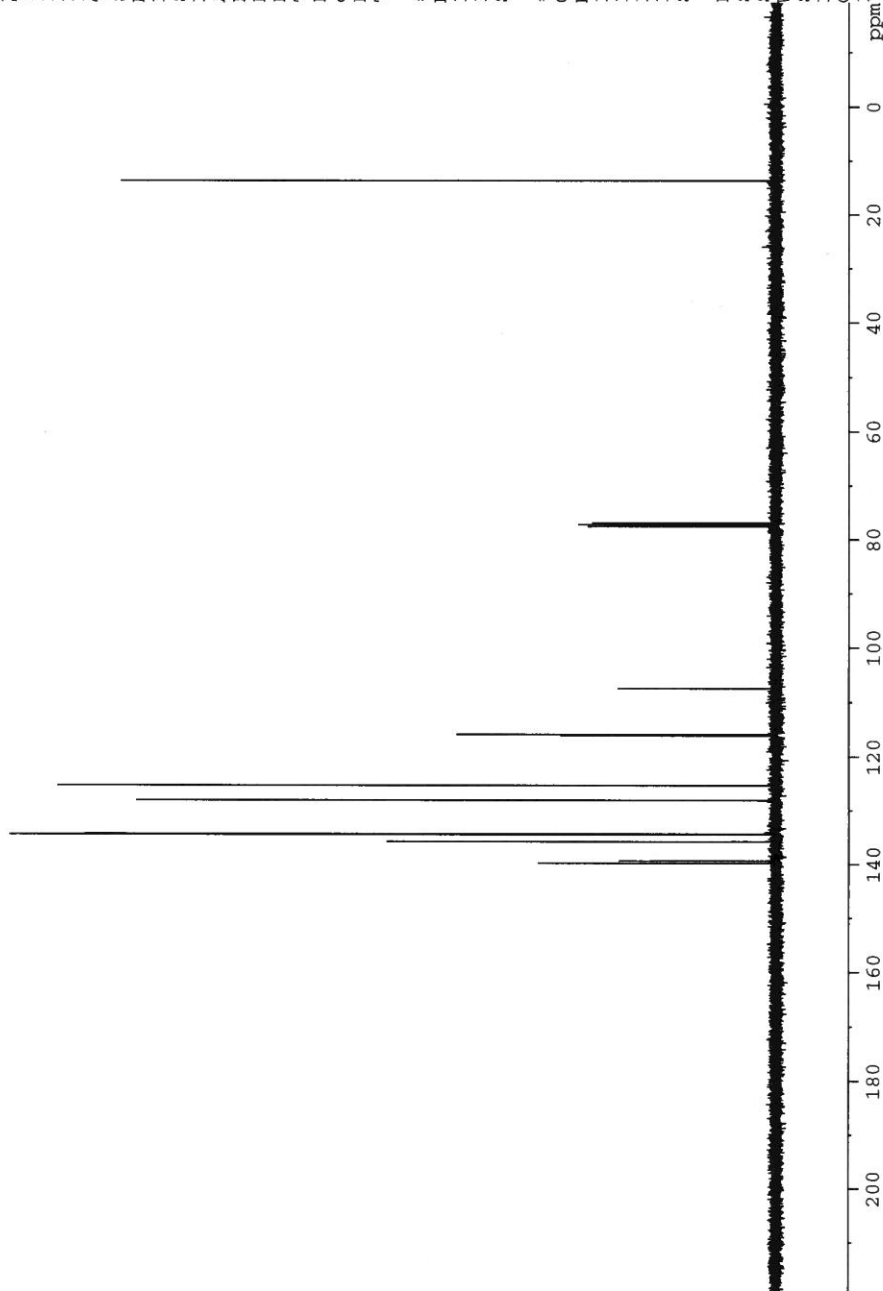

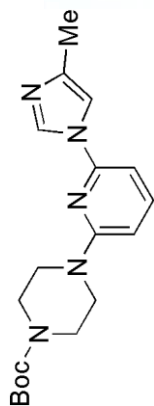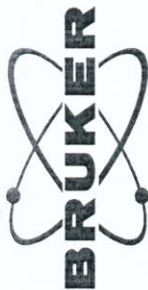

Current Data Parameters  
 NAME SU2-13-4  
 EXPNO 2  
 PROCNO 2

F2 - Acquisition Parameters  
 Date\_ 20110317  
 Time 11.25  
 INSTRUM spect  
 PROHD 5 mm QNP 1H/13  
 FULPROG zg30  
 TD 65536  
 SOLVENT CDCl3  
 NS 8  
 DS 2  
 SWH 8278.146 Hz  
 FIDRES 0.126314 Hz  
 AQ 3.9584243 sec  
 RG 57  
 DW 60.400 usec  
 DE 6.00 usec  
 TE 683.2 K  
 D1 1.00000000 sec  
 TD0 1

===== CHANNEL f1 =====  
 NUC1 1H  
 P1 14.00 usec  
 PL1 0.00 dB  
 SFO1 400.1324710 MHz

F2 - Processing parameters  
 SI 65536  
 SF 400.1300100 MHz  
 WDW no  
 SSB 0  
 LB 0.00 Hz  
 GB 0  
 PC 1.00

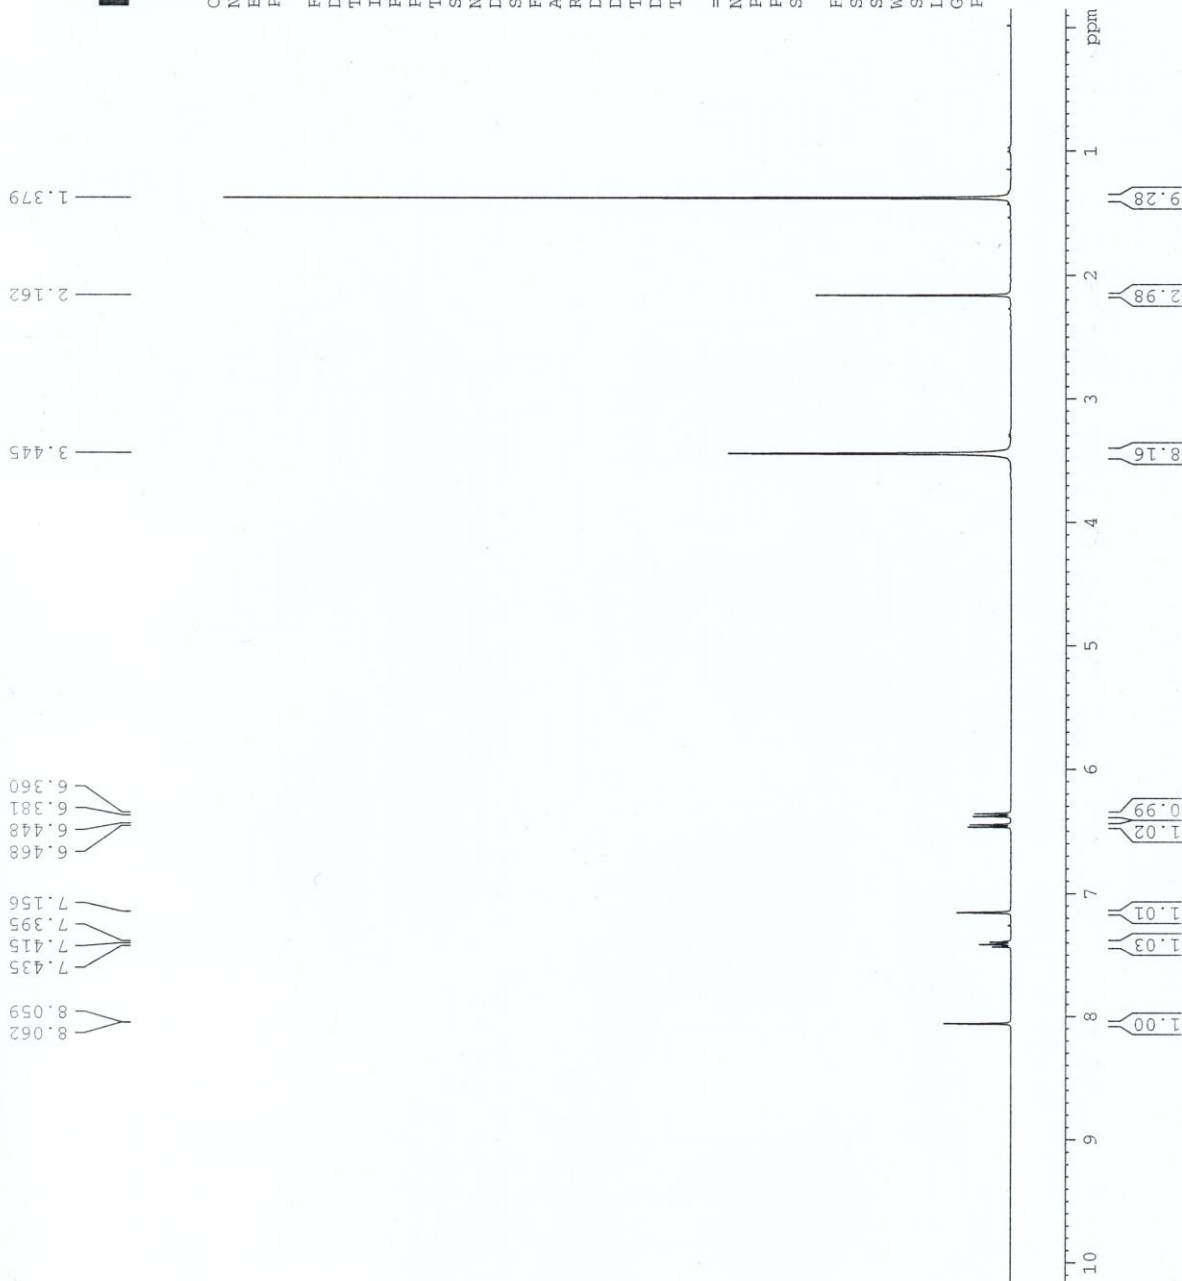

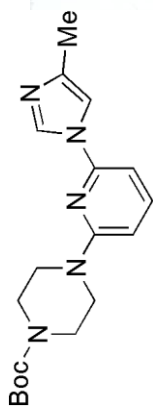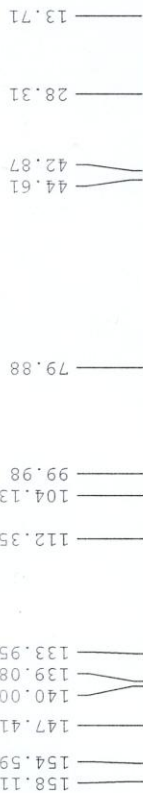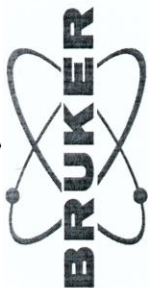

Current Data Parameters  
 NAME SU2-13-4C  
 EXPNO 2  
 PROCNO 2

F2 - Acquisition Parameters  
 Date\_ 20110317  
 Time 11.33  
 INSTRUM spect  
 PROBHD 5 mm QNP 1H/13  
 PULPROG zgpg30  
 TD 65536  
 SOLVENT CDCl3  
 NS 128  
 DS 4  
 SWH 23980.814 Hz  
 FIDRES 0.365918 Hz  
 AQ 1.3664756 sec  
 RG 5792.6  
 DW 20.850 usec  
 DE 6.00 usec  
 TE 683.2 K  
 D1 2.00000000 sec  
 d11 0.03000000 sec  
 DELTA 1.89999998 sec  
 TD0 1

===== CHANNEL f1 =====  
 NUC1 13C  
 P1 9.38 usec  
 PL1 0.00 dB  
 SFO1 100.6228298 MHz

===== CHANNEL f2 =====  
 CPDPRG2 waltz16  
 NUC2 1H  
 FCPD2 90.00 usec  
 PL2 0.00 dB  
 PL12 16.10 dB  
 PL13 19.00 dB  
 SFO2 400.1316005 MHz

F2 - Processing parameters  
 SI 32768  
 SF 100.6127719 MHz  
 WDW no  
 SSB 0  
 LB 0.00 Hz  
 GB 0  
 PC 1.40

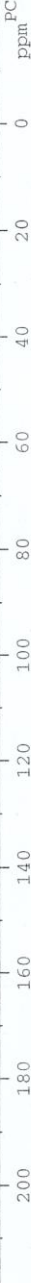

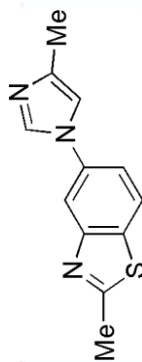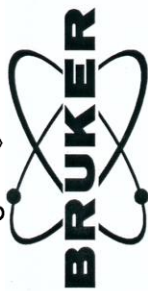

Current Data Parameters  
 NAME SU1-62-1  
 EXPNO 1  
 PROCNO 1

F2 - Acquisition Parameters  
 Date\_ 20100817  
 Time 9.13  
 INSTRUM spect  
 PROBHD 5 mm QNP 1H/13  
 PULPROG zg30  
 TD 65536  
 SOLVENT CDCl3  
 NS 8  
 DS 2  
 SWH 8278.146 Hz  
 FIDRES 0.126314 Hz  
 AQ 3.9584243 sec  
 RG 114  
 DW 60.400 usec  
 DE 6.00 usec  
 TE 295.2 K  
 D1 1.0000000 sec  
 TD0 1

==== CHANNEL f1 =====  
 NUC1 1H  
 P1 14.00 usec  
 PL1 0.00 dB  
 SF01 400.1324710 MHz

F2 - Processing parameters  
 SI 65536  
 SF 400.1300098 MHz  
 WDW no  
 SSB 0  
 LB 0.00 Hz  
 GB 0  
 PC 1.00

7.852  
7.847  
7.812  
7.791  
7.755  
7.730  
7.710  
7.307  
7.305  
7.289  
7.286  
7.284  
7.000  
6.998

2.795  
2.265

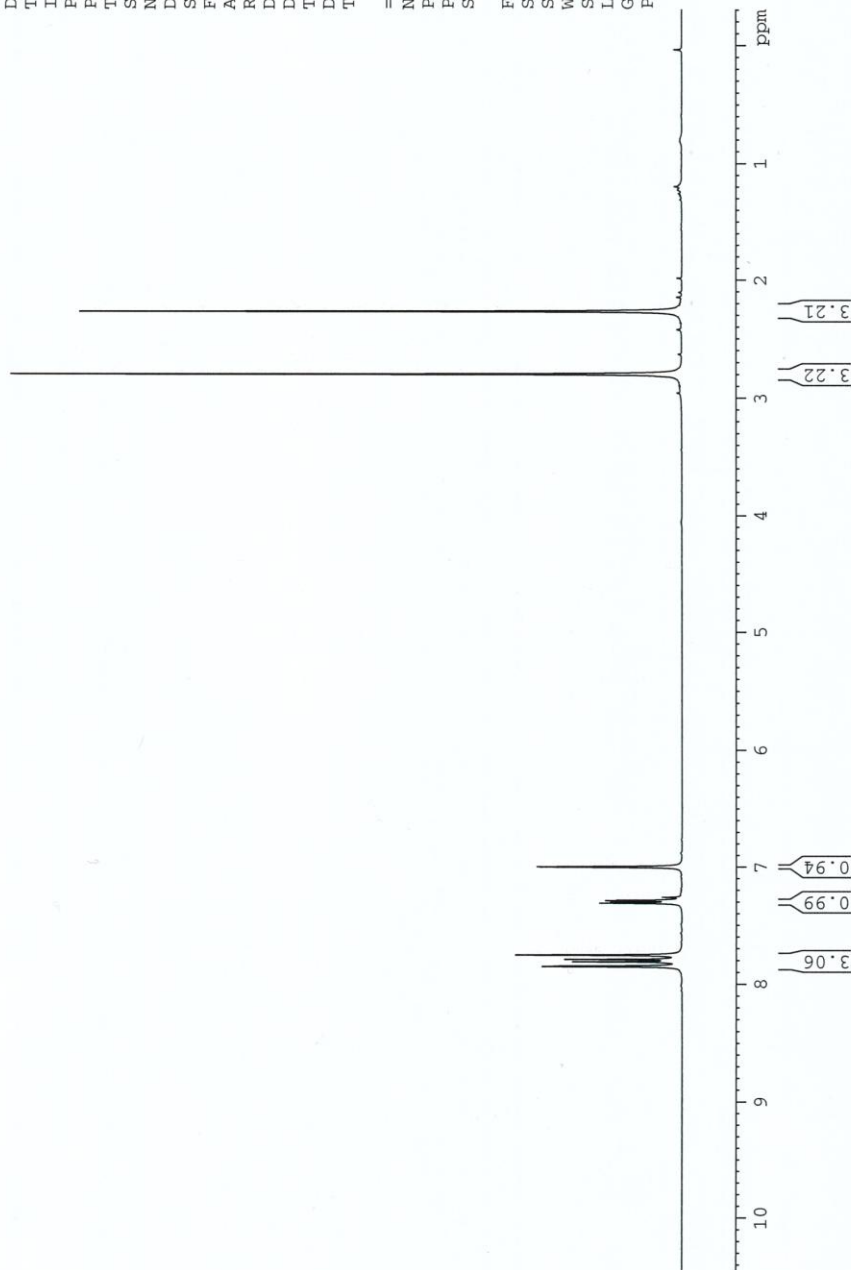

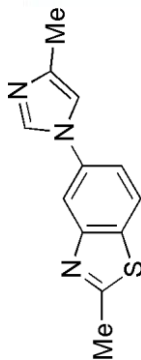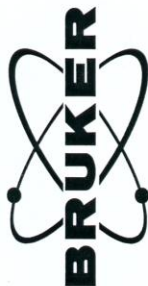

SU1-62-1C

169.66  
154.22  
139.80  
136.00  
134.91  
134.22  
122.51  
118.30  
114.97  
114.68  
20.36  
13.83

Current Data Parameters  
NAME SU1-62-1C  
EXPNO 1  
PROCNO 1

F2 - Acquisition Parameters  
Date\_ 20100817  
Time 9.21  
INSTRUM spect  
PROBHD 5 mm QNP 1H/13  
PULPROG zgpg30  
TD 65536  
SOLVENT CDCl3  
NS 128  
DS 4  
SWH 23980.814 Hz  
FIDRES 0.365918 Hz  
AQ 1.3664756 sec  
RG 1625.5  
DW 20.850 usec  
DE 6.00 usec  
TE 296.2 K  
D1 2.00000000 sec  
d11 0.03000000 sec  
DELTA 1.89999998 sec  
TD0 1

===== CHANNEL f1 =====  
NUC1 13C  
P1 9.38 usec  
PL1 0.00 dB  
SFO1 100.6228298 MHz

===== CHANNEL f2 =====  
CPDPRG2 waltz16  
NUC2 1H  
PCPD2 90.00 usec  
PL2 0.00 dB  
PL12 16.10 dB  
PL13 19.00 dB  
SFO2 400.1316005 MHz

F2 - Processing parameters  
SI 32768  
SF 100.6127609 MHz  
WDW no  
SSB 0  
LB 0.00 Hz  
GB 0  
PC 1.40

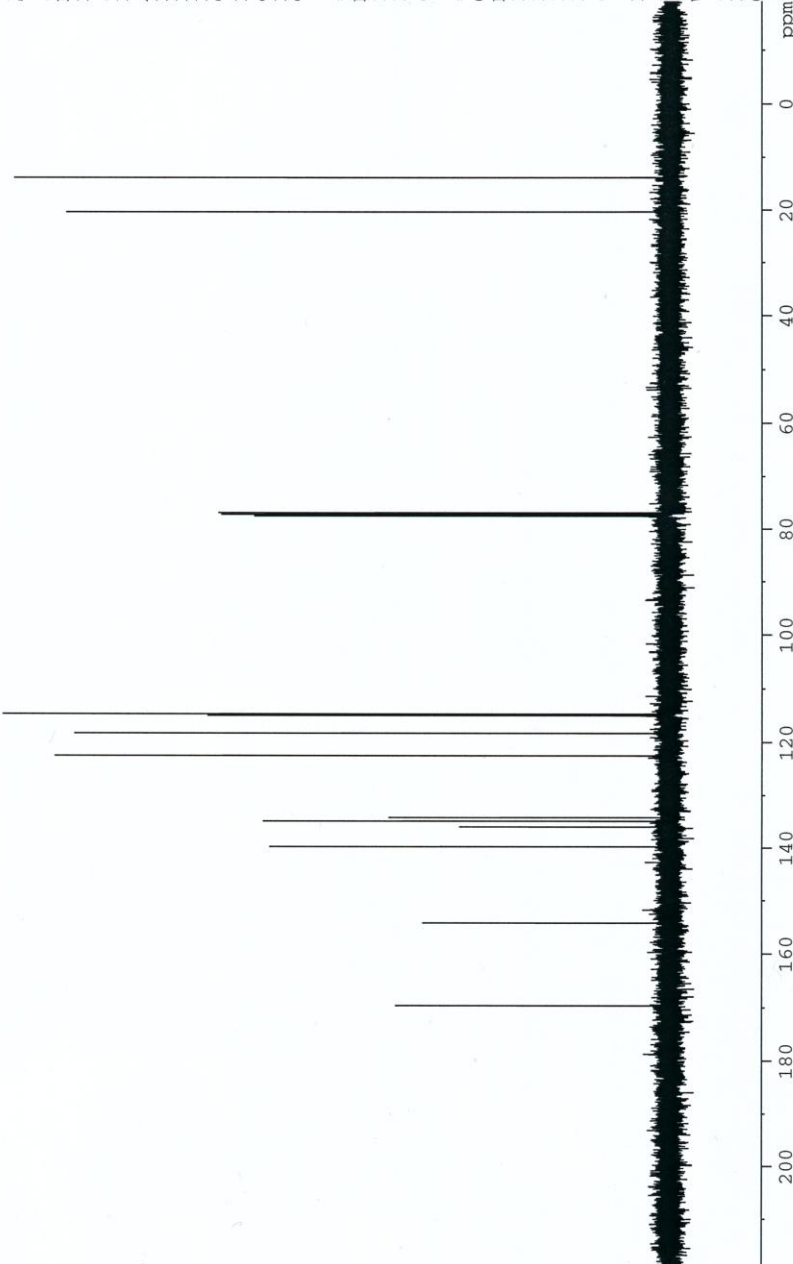

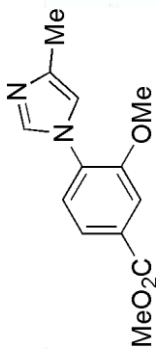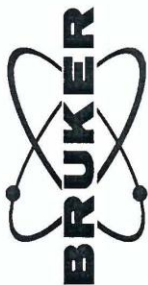

Current Data Parameters  
 NAME SU1-138  
 EXPNO 2  
 PROCNO 2

F2 - Acquisition Parameters  
 Date\_ 20101104  
 Time 11.14  
 INSTRUM spect  
 PROBHD 5 mm BBO BB-1H  
 PULPROG zg30  
 TD 65536  
 SOLVENT CDC13  
 NS 8  
 DS 2  
 SWH 8278.146 Hz  
 FIDRES 0.126314 Hz  
 AQ 3.9584243 sec  
 RG 50.8  
 DW 60.400 usec  
 DE 6.00 usec  
 TE 296.2 K  
 D1 1.00000000 sec  
 TD0 1

===== CHANNEL f1 =====  
 NUC1 1H  
 P1 15.07 usec  
 PL1 0.00 dB  
 SFO1 400.1324710 MHz

F2 - Processing parameters  
 SI 65536  
 SF 400.1300099 MHz  
 WDW no  
 SSB 0  
 LB 0.00 Hz  
 GB 0  
 PC 1.00

2.273  
2.271

3.898  
3.888

7.933  
7.930  
7.685  
7.681  
7.672  
7.668  
7.664  
7.660  
7.320  
7.298  
6.977

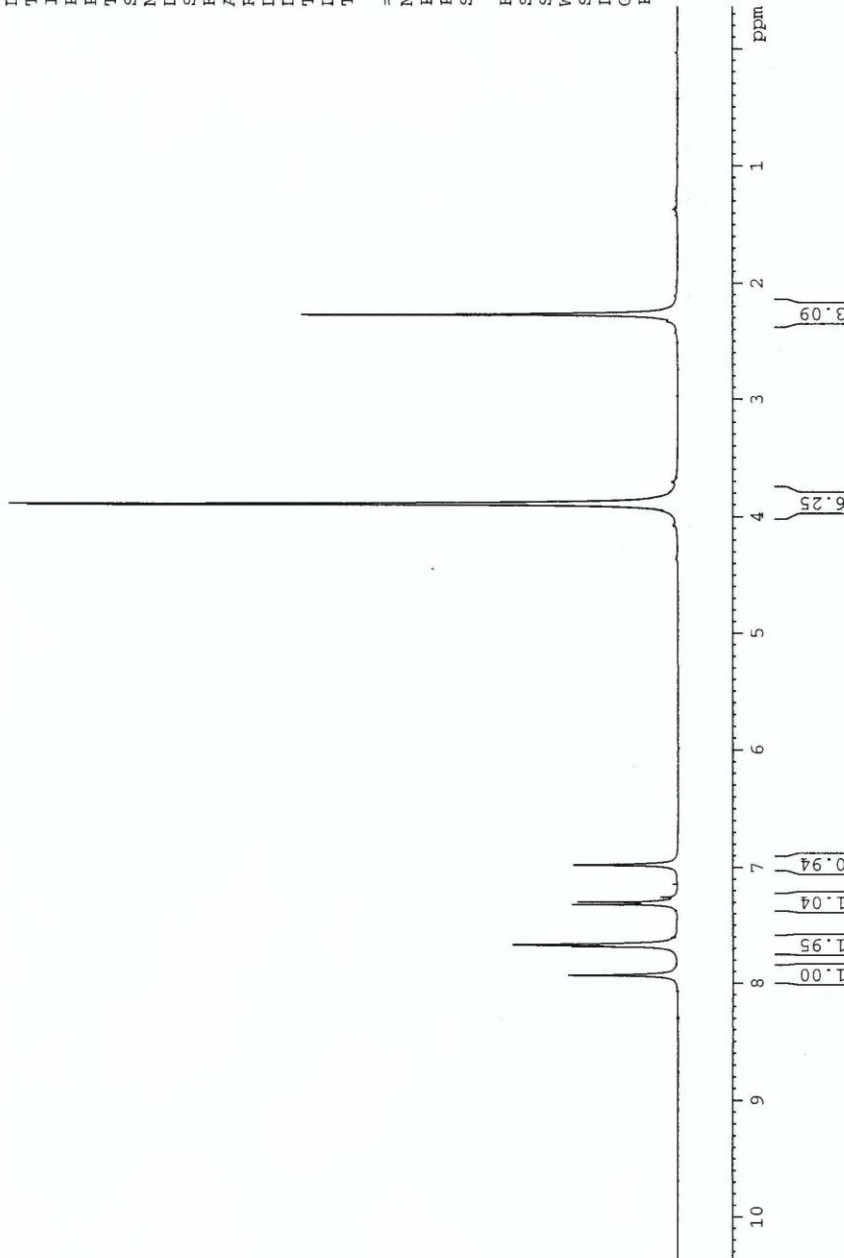

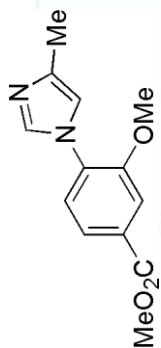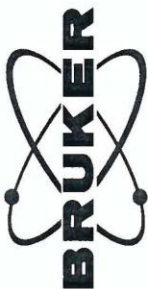

Current Data Parameters  
 NAME SU1-138C  
 EXPNO 2  
 PROCNO 2

F2 - Acquisition Parameters  
 Date\_ 20101104  
 Time 11.29  
 INSTRUM spect  
 PROBHD 5 mm BBO BB-1H  
 PULPROG zgpg30  
 TD 65536  
 SOLVENT CDCl3  
 NS 256  
 DS 2  
 SWH 23980.814 Hz  
 FIDRES 0.365918 Hz  
 AQ 1.3664756 sec  
 RG 8192  
 DW 20.850 usec  
 DE 6.00 usec  
 TE 296.2 K  
 D1 2.00000000 sec  
 d11 0.03000000 sec  
 DELTA 1.89999998 sec  
 TD0 1

===== CHANNEL f1 =====  
 NUC1 13C  
 P1 8.75 usec  
 PL1 -3.00 dB  
 SFO1 100.6228298 MHz

===== CHANNEL f2 =====  
 CPDPRG2 waltz16  
 NUC2 1H  
 PCPD2 90.00 usec  
 PL2 -1.00 dB  
 PL12 14.52 dB  
 PL13 18.00 dB  
 SFO2 400.1316005 MHz

F2 - Processing parameters  
 SI 65536  
 SF 100.6127580 MHz  
 WDW no  
 SSB 0  
 LB 0.00 Hz  
 GB 0  
 PC 1.40

13.18

52.57  
56.27

113.50  
116.63  
122.78  
124.63  
129.98  
130.38  
136.80  
137.24

151.91

166.11

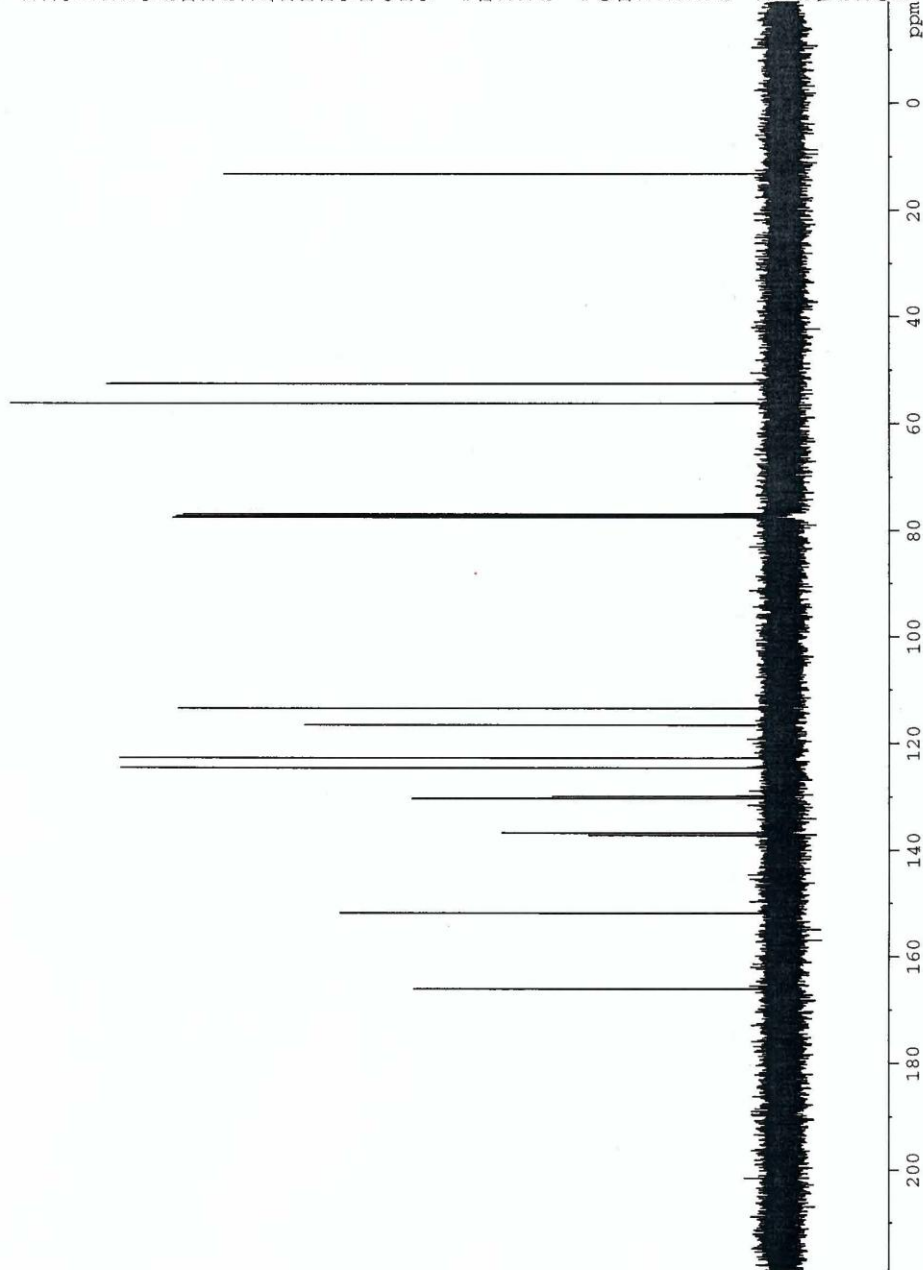

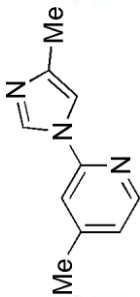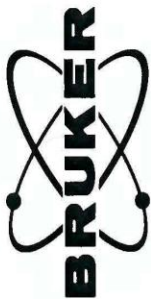

Current Data Parameters  
 NAME SUL-170  
 EXPNO 1  
 PROCNO 1

F2 - Acquisition Parameters  
 Date\_ 20101027  
 Time 9.07  
 INSTRUM spect  
 PROBD 5 mm QNP 1H/13  
 PULPROG zg30  
 TD 65536  
 SOLVENT CDCl3  
 NS 16  
 DS 2  
 SWH 8278.146 Hz  
 FIDRES 0.126314 Hz  
 AQ 3.9584243 sec  
 RG 128  
 DW 60.400 usec  
 DE 6.00 usec  
 TE 295.2 K  
 D1 1.00000000 sec  
 TD0 1

===== CHANNEL f1 =====  
 NUC1 1H  
 P1 14.00 usec  
 PL1 0.00 dB  
 SFO1 400.1324710 MHz

F2 - Processing parameters  
 SI 65536  
 SF 400.1300101 MHz  
 WDW no  
 SSB 0  
 LB 0.00 Hz  
 GB 0  
 PC 1.00

2.315  
2.205

7.235  
7.008  
6.921  
6.910

8.195  
8.183  
8.149

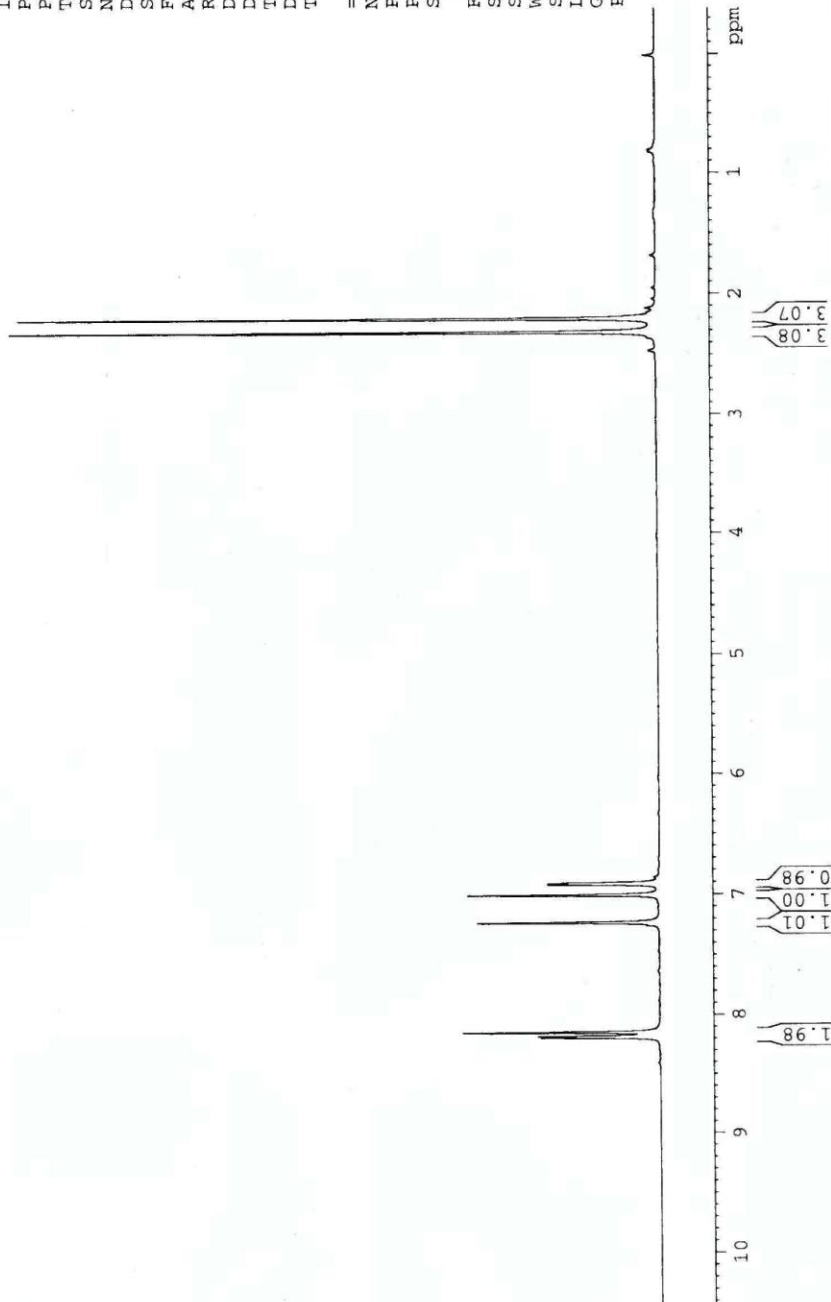

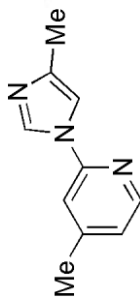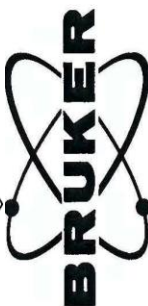

Current Data Parameters  
 NAME SUI-170C  
 EXPNO 1  
 PROCNO 1

F2 - Acquisition Parameters

Date\_ 20101027  
 Time 9.15  
 INSTRUM spect  
 PROBHD 5 mm QNP 1H/13  
 PULPROG zgpg30  
 TD 65536  
 SOLVENT CDCl3  
 NS 128  
 DS 4  
 SMH 23980.814 Hz  
 FIDRES 0.365918 Hz  
 AQ 1.3664756 sec  
 RG 1625.5  
 DW 20.850 usec  
 DE 6.00 usec  
 TE 295.2 K  
 D1 2.00000000 sec  
 d11 0.03000000 sec  
 DELTA 1.89999998 sec  
 TD0 1

===== CHANNEL f1 =====  
 NUC1 13C  
 P1 9.38 usec  
 PL1 0.00 dB  
 SFO1 100.6228298 MHz

===== CHANNEL f2 =====  
 CPDPRG2 waltz16  
 NUC2 1H  
 PCPD2 90.00 usec  
 PL2 0.00 dB  
 PL12 16.10 dB  
 PL13 19.00 dB  
 SFO2 400.1316005 MHz

F2 - Processing parameters  
 SI 32768  
 SF 100.6127641 MHz  
 WDW no  
 SSB 0  
 LB 0.00 Hz  
 GB 0  
 PC 1.40

21.22  
 13.79

150.46  
 149.25  
 148.59  
 139.67  
 134.17  
 122.72  
 112.60  
 112.45

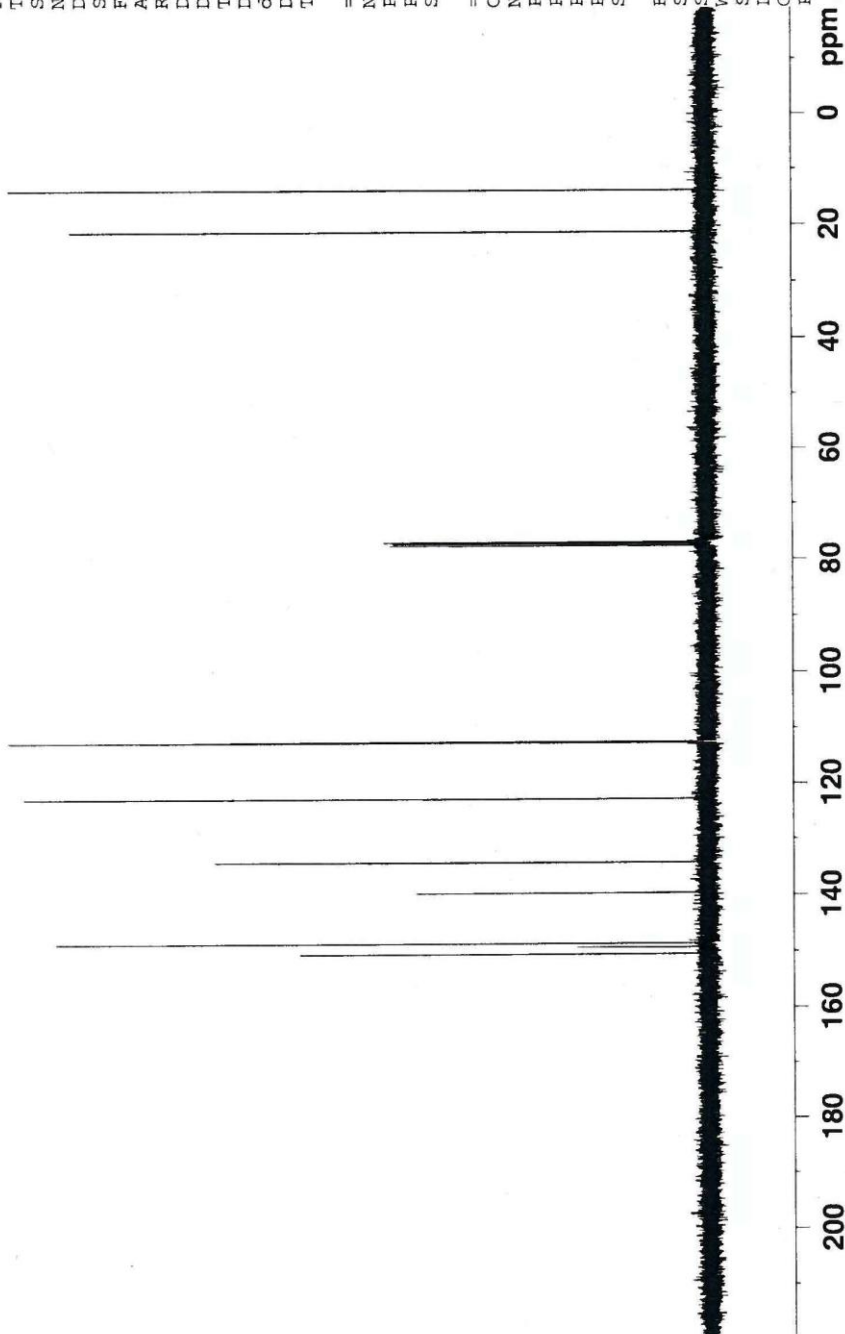

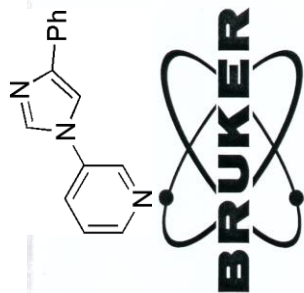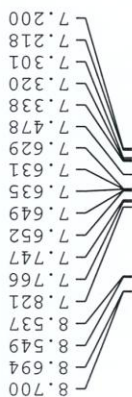

SU1-23-18

Current Data Parameters  
 NAME SU1-23-18  
 EXPNO 1  
 PROCNO 1

F2 - Acquisition Parameters  
 Date\_ 20100813  
 Time 9.30  
 INSTRUM spect  
 PROBD 5 mm QNP 1H/13  
 PULPROG zg30  
 TD 65536  
 SOLVENT CDCl3  
 NS 8  
 DS 2  
 SWH 8278.146 Hz  
 FIDRES 0.126314 Hz  
 AQ 3.9584243 sec  
 RG 57  
 DW 60.400 usec  
 DE 6.00 usec  
 TE 295.2 K  
 D1 1.00000000 sec  
 TD0 1

===== CHANNEL f1 =====  
 NUC1 1H  
 P1 14.00 usec  
 PL1 0.00 dB  
 SFO1 400.1324710 MHz

F2 - Processing parameters  
 SI 65536  
 SF 400.1300220 MHz  
 WDW no  
 SSB 0  
 LB 0.00 Hz  
 GB 0  
 PC 1.00

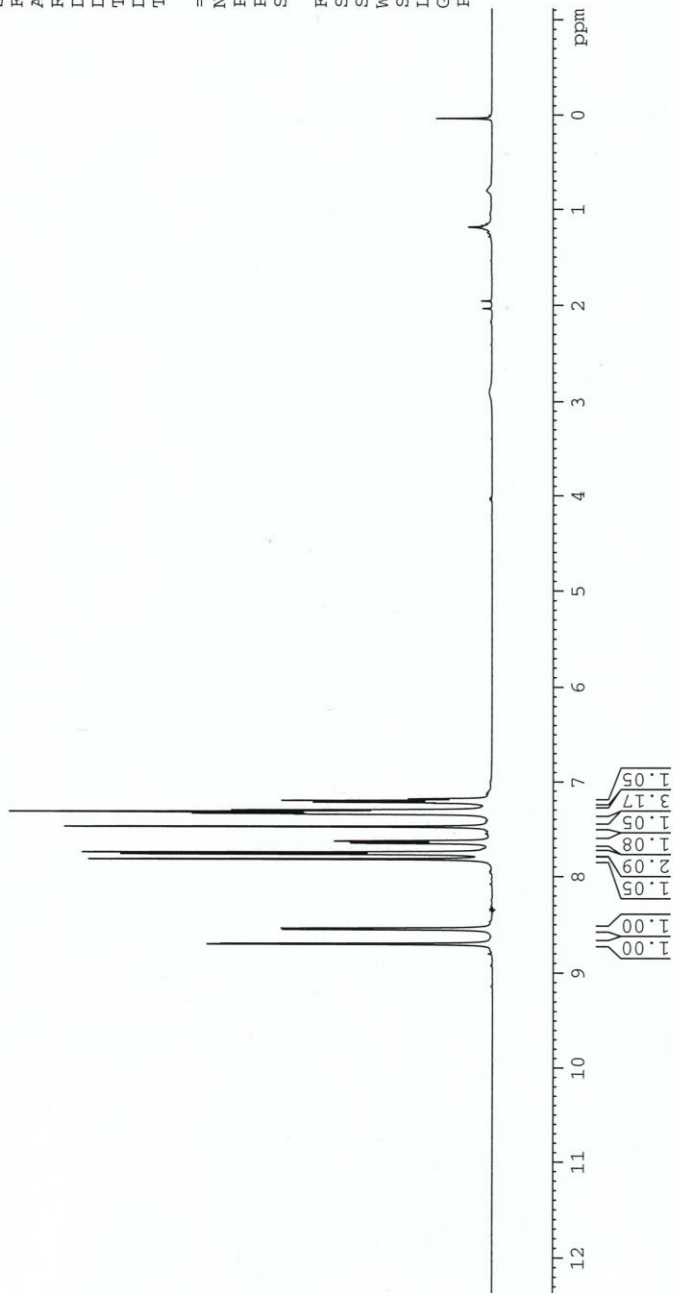

SU1-23-18

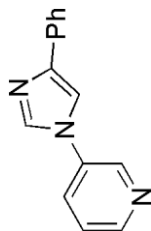

148.77  
143.87  
142.62  
135.58  
133.74  
133.32  
128.75  
128.56  
127.44  
125.05  
124.33  
113.39

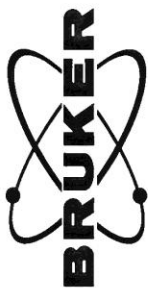

Current Data Parameters  
NAME SU1-23-18  
EXPNO 2  
PROCNO 2

F2 - Acquisition Parameters  
Date\_ 20100815  
Time 15.24  
INSTRUM spect  
PROBHD 5 mm QNP 1H/13  
PULPROG zgpg30  
TD 65536  
SOLVENT CDCl3  
NS 128  
DS 4  
SWH 23980.814 Hz  
FIDRES 0.365918 Hz  
AQ 1.3664756 sec  
RG 1625.5  
DW 20.850 usec  
DE 6.00 usec  
TE 295.2 K  
D1 2.00000000 sec  
d11 0.03000000 sec  
DELTA 1.89999998 sec  
TD0 1

===== CHANNEL f1 =====  
NUC1 13C  
P1 9.38 usec  
PL1 0.00 dB  
SFO1 100.6228298 MHz

===== CHANNEL f2 =====  
CPDPRG2 waltz16  
NUC2 1H  
PCPD2 90.00 usec  
PL2 0.00 dB  
PL12 16.10 dB  
PL13 19.00 dB  
SFO2 400.1316005 MHz

F2 - Processing parameters  
SI 32768  
SF 100.6127669 MHz  
WDW no  
SSB 0  
LB 0.00 Hz  
GB 0  
PC 1.40

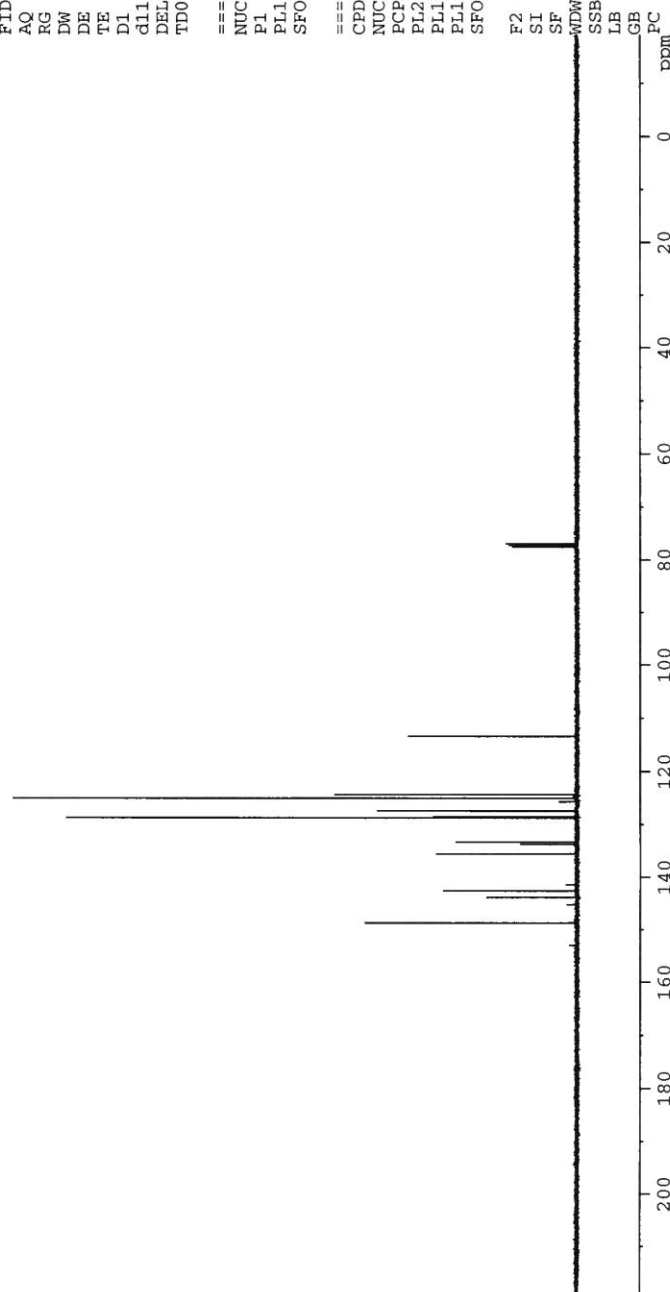

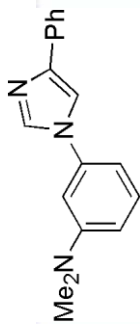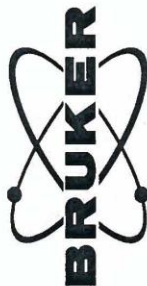

Current Data Parameters  
 NAME SUI-162-3  
 EXPNO 1  
 PROCNO 1

F2 - Acquisition Parameters  
 Date\_ 20101025  
 Time 12.20  
 INSTRUM spect  
 PROBHD 5 mm BBO BB-1H  
 PULPROG zg30  
 TD 65536  
 SOLVENT CDCl3  
 NS 8  
 DS 2  
 SWH 8278.146 Hz  
 FIDRES 0.126314 Hz  
 AQ 3.9584243 sec  
 RG 20.2  
 DW 60.400 usec  
 DE 6.00 usec  
 TE 296.2 K  
 D1 1.00000000 sec  
 TD0 1

===== CHANNEL f1 =====  
 NUC1 1H  
 P1 15.07 usec  
 PL1 0.00 dB  
 SFO1 400.1324710 MHz

F2 - Processing parameters  
 SI 65536  
 SF 400.1300152 MHz  
 WDW no  
 SSB 0  
 LB 0.00 Hz  
 GB 0  
 PC 1.00

6.614  
6.620  
6.624  
6.645  
6.650  
6.662  
6.664  
6.681  
6.686  
7.225  
7.245  
7.261  
7.264  
7.364  
7.384  
7.402  
7.525  
7.528  
7.856  
7.874  
7.878

2.929

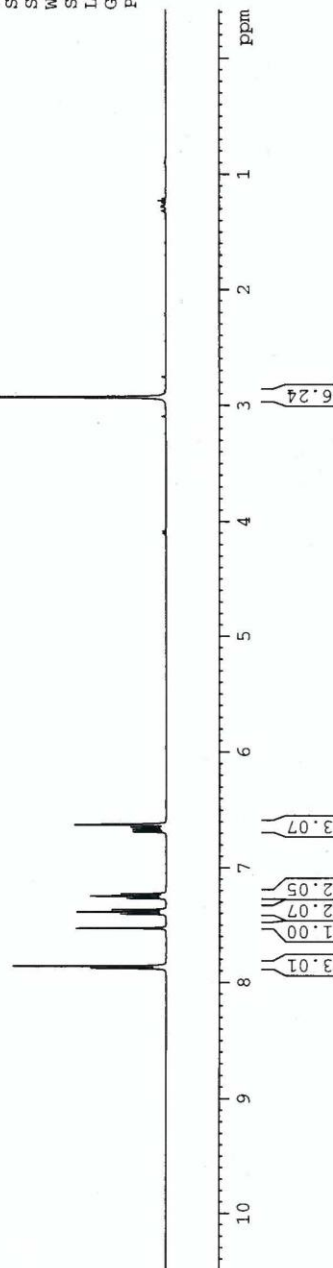

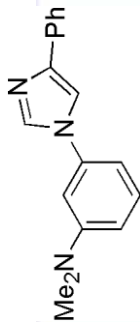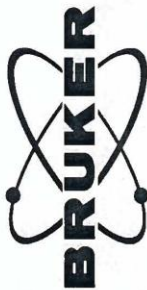

Current Data Parameters  
 NAME SUI-162-3C  
 EXPNO 1  
 PROCNO 1

F2 - Acquisition Parameters  
 Date\_ 20101025  
 Time 12.28  
 INSTRUM spect  
 PROBHD 5 mm BBO BB-1H  
 PULPROG zgpg30  
 TD 65536  
 SOLVENT CDCl3  
 NS 128  
 DS 2  
 SWH 23980.814 Hz  
 FIDRES 0.365918 Hz  
 AQ 1.3664756 sec  
 RG 8192  
 DW 20.850 usec  
 DE 6.00 usec  
 TE 296.2 K  
 D1 2.00000000 sec  
 d11 0.03000000 sec  
 DELTA 1.89999998 sec  
 TD0 1

===== CHANNEL f1 =====  
 NUC1 13C  
 P1 8.75 usec  
 PL1 -3.00 dB  
 SFO1 100.6228298 MHz

===== CHANNEL f2 =====  
 CPDPRG2 waltz16  
 NUC2 1H  
 P2 90.00 usec  
 PL2 -1.00 dB  
 PL12 14.52 dB  
 PL13 18.00 dB  
 SFO2 400.1316005 MHz

F2 - Processing parameters  
 SI 65536  
 SF 100.6127825 MHz  
 MDW no  
 SSB 0  
 LB 0.00 Hz  
 GB 0  
 PC 1.40

151.35  
 142.64  
 138.12  
 135.76  
 133.95  
 130.20  
 128.55  
 126.84  
 124.83  
 114.03  
 111.17  
 108.89  
 104.77

40.23

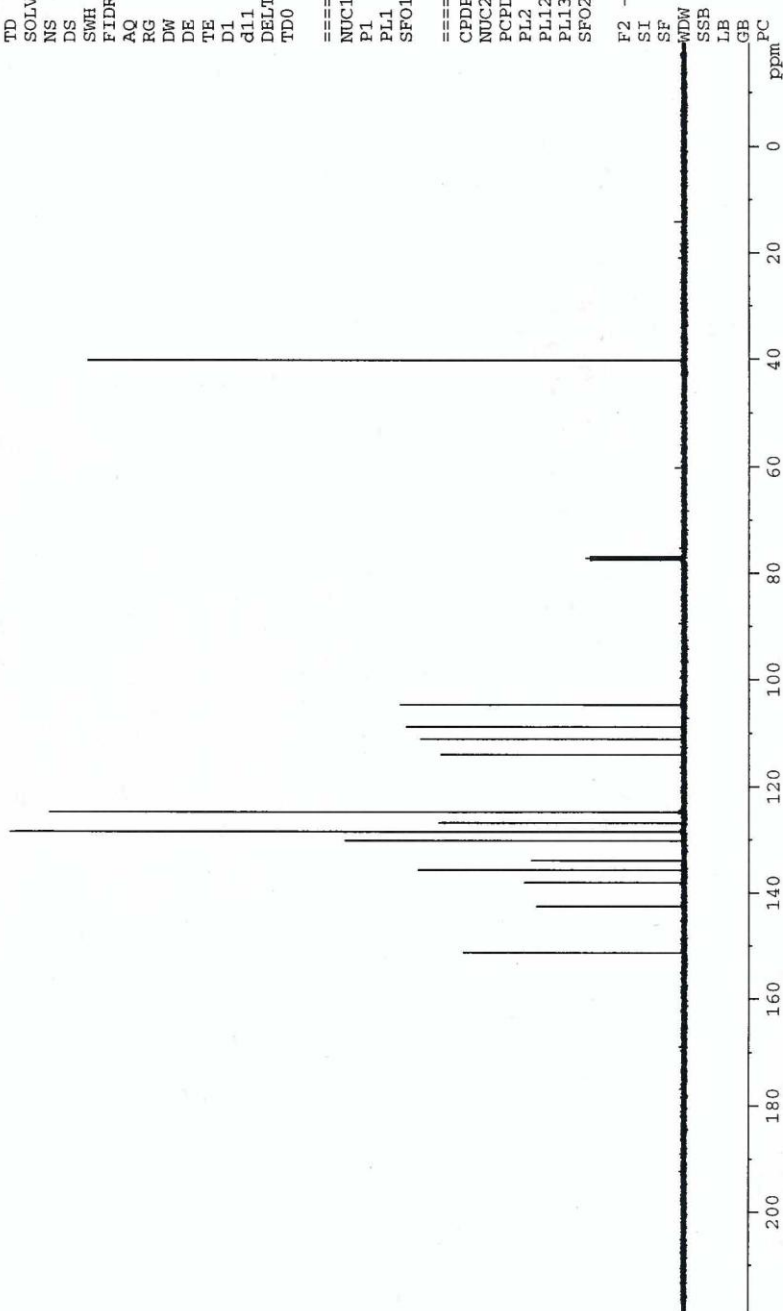

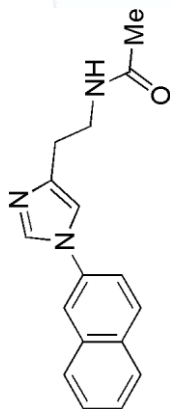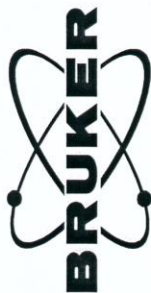

Current Data Parameters  
 NAME SUI-45  
 EXPNO 1  
 PROCNO 1

F2 - Acquisition Parameters  
 Date\_ 20100813  
 Time 8.35  
 INSTRUM spect  
 PROBHD 5 mm QNP 1H/13  
 PULPROG zg30  
 TD 65536  
 SOLVENT CDCl3  
 NS 16  
 DS 2  
 SWH 8278.146 Hz  
 FIDRES 0.126314 Hz  
 AQC 3.9584243 sec  
 RG 57  
 DW 60.400 usec  
 DE 6.00 usec  
 TE 295.2 K  
 D1 1.00000000 sec  
 TD0 1

===== CHANNEL f1 =====  
 NUC1 1H  
 P1 14.00 usec  
 PL1 0.00 dB  
 SFO1 400.1324710 MHz

F2 - Processing parameters  
 SI 65536  
 SF 400.1300095 MHz  
 WDW no  
 SSB 0  
 LB 0.00 Hz  
 GB 0  
 PC 1.00

1.963  
 2.796  
 2.812  
 2.828  
 3.548  
 3.564  
 3.579  
 3.594

6.972  
 7.147  
 7.393  
 7.415  
 7.431  
 7.449  
 7.469  
 7.488  
 7.504  
 7.690  
 7.764  
 7.785  
 7.817  
 7.834  
 7.856

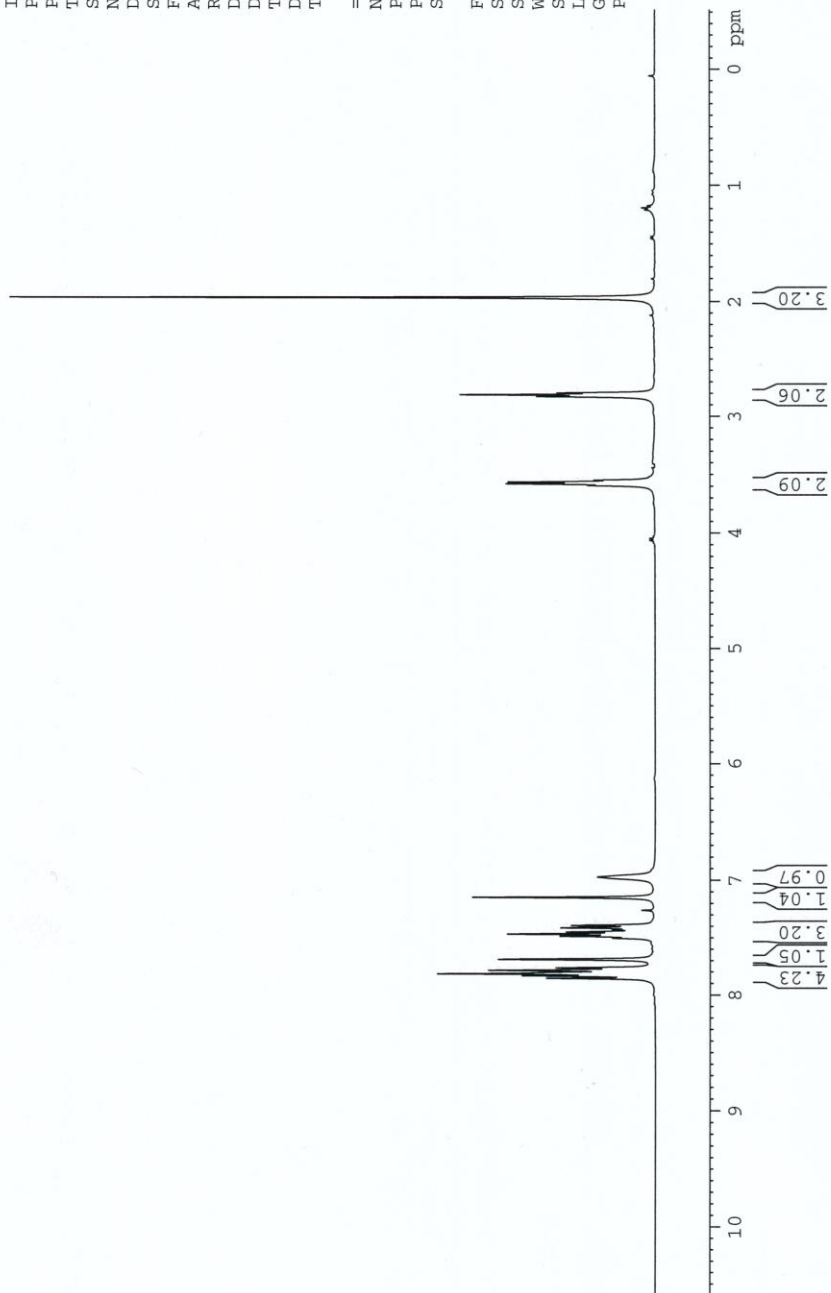

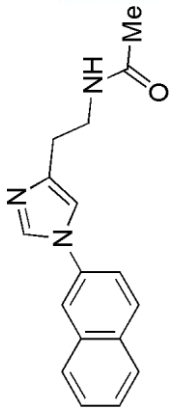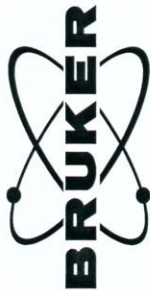

SU1-45C

141.58  
135.07  
134.52  
133.48  
132.07  
130.09  
127.86  
127.75  
127.38  
126.45  
119.83  
118.55  
115.20

39.35  
27.80  
23.40

Current Data Parameters  
NAME SU1-45C  
EXPNO 1  
PROCNO 1

F2 - Acquisition Parameters  
Date\_ 20100813  
Time 8.46

INSTRUM spect  
PROBHD 5 mm QNP 1H/13  
PULPROG zgpg30  
TD 65536  
SOLVENT CDCl3  
NS 128  
DS 4  
SWH 23980.814 Hz  
FIDRES 0.365918 Hz  
AQ 1.3664756 sec  
RG 1625.5  
DW 20.850 usec  
DE 6.00 usec  
TE 295.2 K  
D1 2.00000000 sec  
d11 0.03000000 sec  
DELTA 1.89999998 sec  
TD0 1

===== CHANNEL f1 =====  
NUC1 13C  
P1 9.38 usec  
PL1 0.00 dB  
SFO1 100.628298 MHz

===== CHANNEL f2 =====  
CPDPRG2 waltz16  
NUC2 1H  
PCPD2 90.00 usec  
PL2 0.00 dB  
PL12 16.10 dB  
PL13 19.00 dB  
SFO2 400.1316005 MHz

F2 - Processing parameters  
SI 32768  
SF 100.6127681 MHz  
WDW no  
SSB 0  
LB 0.00 Hz  
GB 0  
PC 1.40

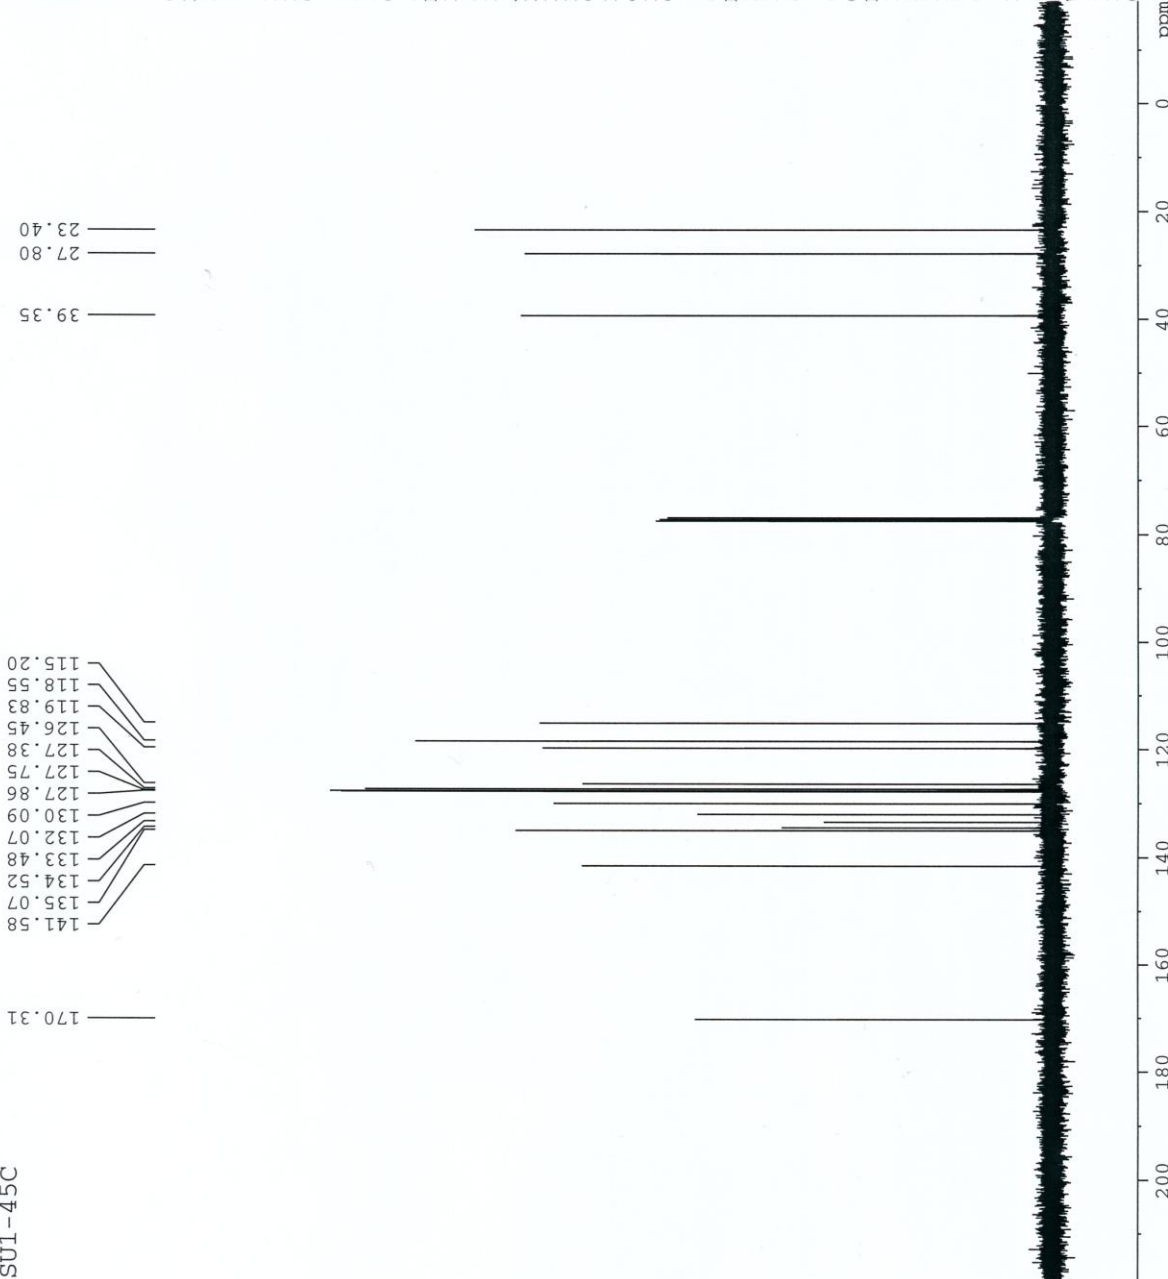

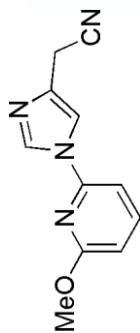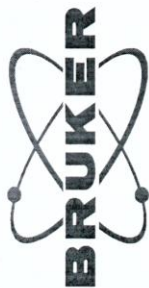

Current Data Parameters  
 NAME SU2-12  
 EXPNO 1  
 PROCNO 1

F2 - Acquisition Parameters  
 Date\_ 20110315  
 Time 12.28  
 INSTRUM spect  
 PROBHD 5 mm QNP 1H/13  
 PULPROG zg30  
 TD 65536  
 SOLVENT CDCl3  
 NS 16  
 DS 2  
 SWH 8278.146 Hz  
 FIDRES 0.126314 Hz  
 AQ 3.9584243 sec  
 RG 114  
 DW 60.400 usec  
 DE 6.00 usec  
 TE 683.2 K  
 D1 1.00000000 sec  
 TD0 1

===== CHANNEL f1 =====  
 NUC1 1H  
 P1 14.00 usec  
 PL1 0.00 dB  
 SF01 400.1324710 MHz

F2 - Processing parameters  
 SI 65536  
 SF 400.1300098 MHz  
 WDW no  
 SSB 0  
 LB 0.00 Hz  
 GB 0  
 PC 1.00

3.913  
3.729

8.225  
7.649  
7.630  
7.610  
7.577  
6.848  
6.829  
6.644  
6.623

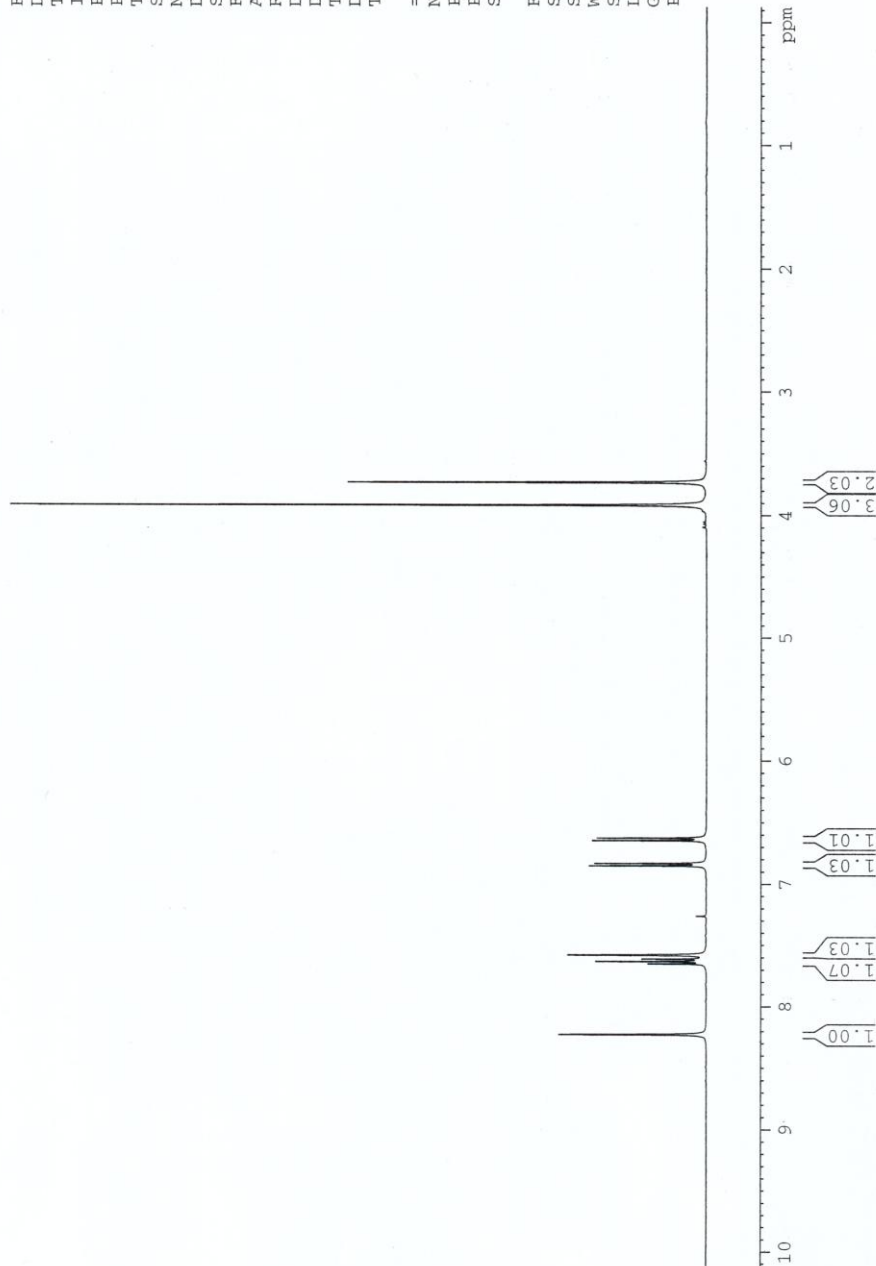

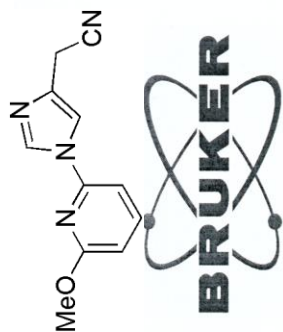

Current Data Parameters  
 NAME SU2-12C  
 EXPNO 1  
 PROCNO 1

F2 - Acquisition Parameters

Date\_ 20110315  
 Time 12.43  
 INSTRUM spect  
 PROBD 5 mm QNP 1H/13  
 PULPROG zgpg30  
 TD 65536  
 SOLVENT CDCl3  
 NS 256  
 DS 4  
 SWH 23980.814 Hz  
 FIDRES 0.365918 Hz  
 AQ 1.3664756 sec  
 RG 1625.5  
 DW 20.850 usec  
 DE 6.00 usec  
 TE 683.2 K  
 D1 2.00000000 sec  
 d11 0.03000000 sec  
 DELTA 1.89999998 sec  
 TD0 1

===== CHANNEL f1 =====  
 NUC1 13C  
 P1 9.38 usec  
 PL1 0.00 dB  
 SFO1 100.628298 MHz

===== CHANNEL f2 =====  
 CPDPRG2 waltz16  
 NUC2 1H  
 P2 90.00 usec  
 PL2 0.00 dB  
 PL12 16.10 dB  
 PL13 19.00 dB  
 SFO2 400.1316005 MHz

F2 - Processing parameters  
 SI 32768  
 SF 100.6127634 MHz  
 WDW no  
 SSB 0  
 LB 0.00 Hz  
 GB 0  
 PC 1.40

17.87

53.78

103.57

109.22

114.02

117.39

133.03

135.20

141.16

146.46

163.76

ppm

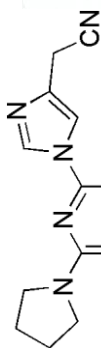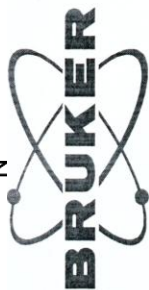

Current Data Parameters  
 NAME SU2-13-5  
 EXPNO 1  
 PROCNO 1

F2 - Acquisition Parameters  
 Date\_ 20110318  
 Time 17.07  
 INSTRUM spect  
 PROBD 5 mm QNP 1H/13  
 PULPROG zg30  
 TD 65536  
 SOLVENT CDCl3  
 NS 8  
 DS 2  
 SWH 8278.146 Hz  
 FIDRES 0.126314 Hz  
 AQ 3.9584243 sec  
 RG 57  
 DW 60.400 usec  
 DE 6.00 usec  
 TE 300.0 K  
 D1 1.0000000 sec  
 TD0 1

==== CHANNEL f1 =====  
 NUC1 1H  
 P1 14.00 usec  
 PL1 0.00 dB  
 SFO1 400.1324710 MHz

F2 - Processing parameters  
 SI 65536  
 SF 400.1300098 MHz  
 WDW no  
 SSB 0  
 LB 0.00 Hz  
 GB 0  
 PC 1.00

1.913  
1.897

3.650  
3.368  
3.352  
3.326

8.114  
8.111  
8.111  
7.751  
7.634  
7.484  
7.482

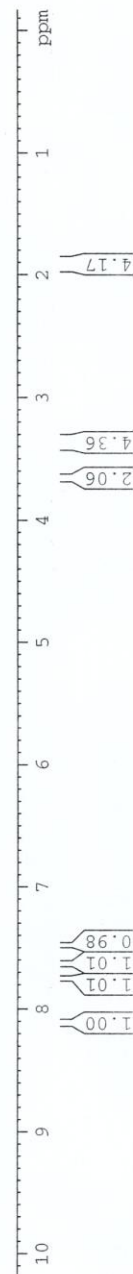

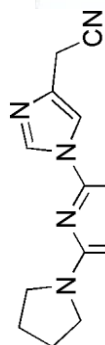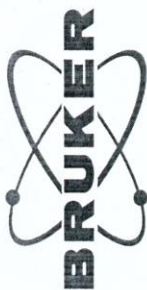

Current Data Parameters  
 NAME SU2-13-5C  
 EXPNO 1  
 PROCNO 1

F2 - Acquisition Parameters  
 Date\_ 20110318  
 Time 17.11  
 INSTRUM spect  
 PROBHD 5 mm QNP 1H/13  
 PULPROG zgpg30  
 TD 65536  
 SOLVENT CDCl3  
 NS 64  
 DS 4  
 SWH 23980.814 Hz  
 FIDRES 0.365918 Hz  
 AQ 1.3664756 sec  
 RG 1625.5  
 DW 20.850 usec  
 DE 6.00 usec  
 TE 683.2 K  
 D1 2.00000000 sec  
 d11 0.03000000 sec  
 DELTA 1.89999998 sec  
 TD0 1

===== CHANNEL f1 =====  
 NUC1 13C  
 P1 9.38 usec  
 PL1 0.00 dB  
 SF01 100.6228298 MHz

===== CHANNEL f2 =====  
 CPDPRG2 waltz16  
 NUC2 1H  
 PCPD2 90.00 usec  
 PL2 0.00 dB  
 PL12 16.10 dB  
 PL13 19.00 dB  
 SFO2 400.1316005 MHz

F2 - Processing parameters  
 SI 32768  
 SF 100.6127841 MHz  
 WDW no  
 SSB 0  
 LB 0.00 Hz  
 GB 0  
 PC 1.40

151.21  
 142.63  
 134.89  
 132.84  
 128.59  
 118.30  
 117.15  
 113.54  
 46.29  
 25.07  
 17.57

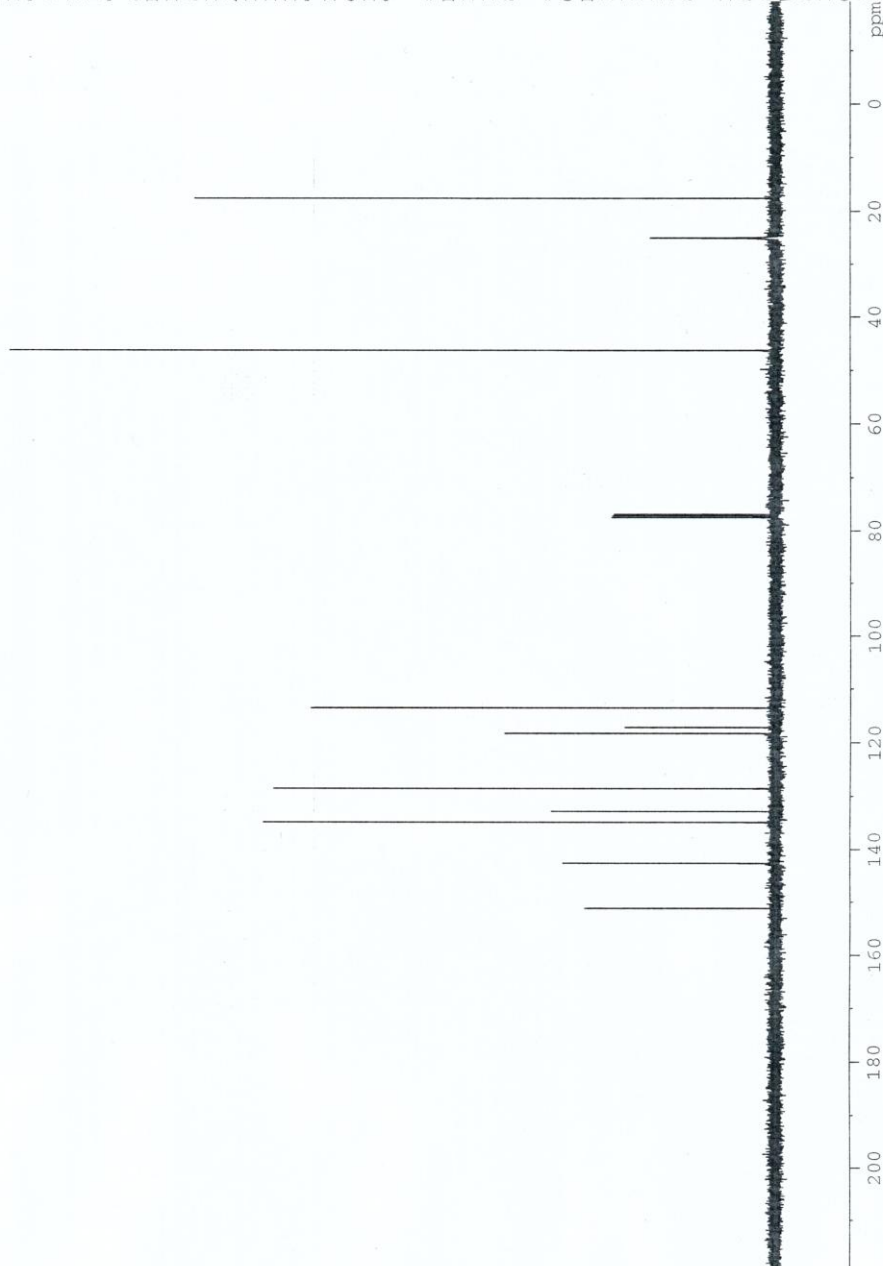

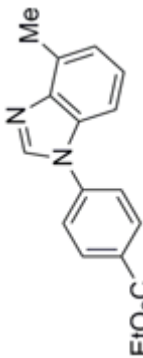

1.422  
1.404  
1.386

2.699

8.233  
8.232  
8.228  
8.216  
8.215  
8.211  
8.206  
8.110  
7.591  
7.590  
7.586  
7.585  
7.581  
7.569  
7.567  
7.564  
7.559  
7.395  
7.393  
7.375  
7.374  
7.373  
7.248  
7.229  
7.227  
7.209  
7.145  
7.143  
7.127  
7.125  
4.430  
4.412  
4.394  
4.377

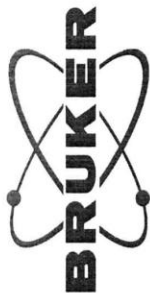

Current Data Parameters  
NAME SU2-216  
EXPNO 1  
PROCNO 1

F2 - Acquisition Parameters  
Date\_ 20110919  
Time 11.02  
INSTRUM spect  
PROBHD 5 mm BBO BB-1H  
PULPROG zg30  
TD 65536  
SOLVENT CDCl3  
NS 8  
DS 2  
SWH 8278.146 Hz  
FIDRES 0.126314 Hz  
AQ 3.9584243 sec  
RG 128  
DW 60.400 usec  
DE 6.00 usec  
TE 297.2 K  
D1 1.00000000 sec  
TD0 1

==== CHANNEL f1 =====  
NUC1 1H  
P1 15.07 usec  
PL1 0.00 dB  
SFO1 400.1324710 MHz

F2 - Processing parameters  
SI 65536  
SF 400.1300212 MHz  
WDW no  
SSB 0  
LB 0.00 Hz  
GB 0  
PC 1.00

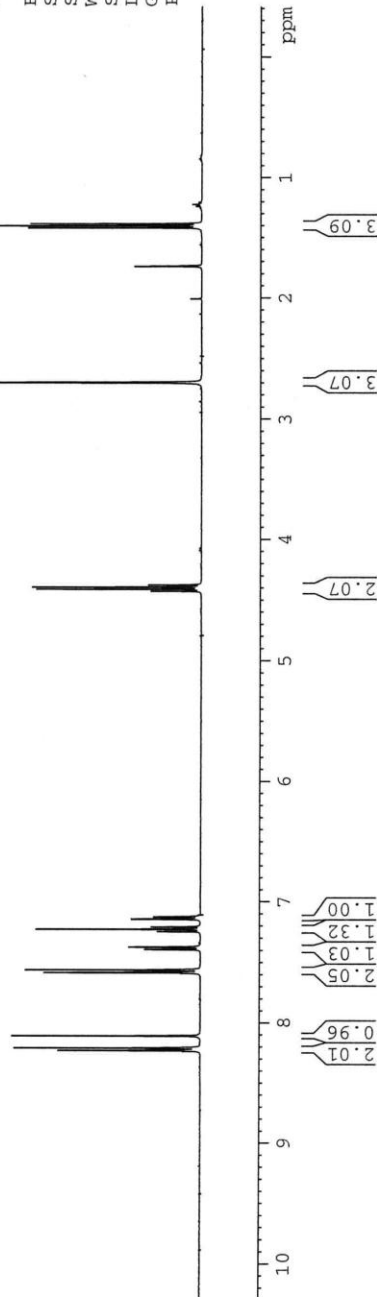

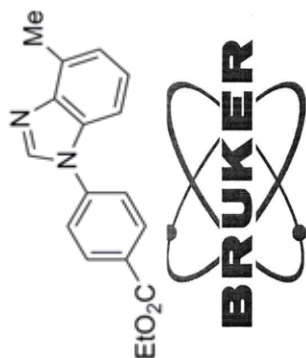

14.40  
16.77

61.42

108.02  
123.17  
123.60  
124.05  
129.68  
130.85  
131.55  
132.81  
140.28  
141.08  
143.59

165.58

Current Data Parameters  
NAME SU2-216C  
EXPNO 3  
PROCNO 3

F2 - Acquisition Parameters  
Date\_ 20110920  
Time 9.36  
INSTRUM spect  
PROBHD 5 mm QNP 1H/13  
PULPROG zgpg30  
TD 65536  
SOLVENT CDCl<sub>3</sub>  
NS 128  
DS 4  
SWH 23980.814 Hz  
FIDRES 0.365918 Hz  
AQ 1.3664756 sec  
RG 4096  
DW 20.850 usec  
DE 6.00 usec  
TE 683.2 K  
D1 2.00000000 sec  
d11 0.03000000 sec  
DELTA 1.89999998 sec  
TD0 1

===== CHANNEL f1 =====  
NUC1 13C  
P1 9.38 usec  
PL1 0.00 dB  
SFO1 100.6228298 MHz

===== CHANNEL f2 =====  
CPDPRG2 waltz16  
NUC2 1H  
PCPD2 90.00 usec  
PL2 0.00 dB  
PL12 16.10 dB  
PL13 19.00 dB  
SFO2 400.1316005 MHz

F2 - Processing parameters  
SI 32768  
SF 100.6127640 MHz  
WDW no  
SSB 0  
LB 0.00 Hz  
GB 0  
PC 1.40

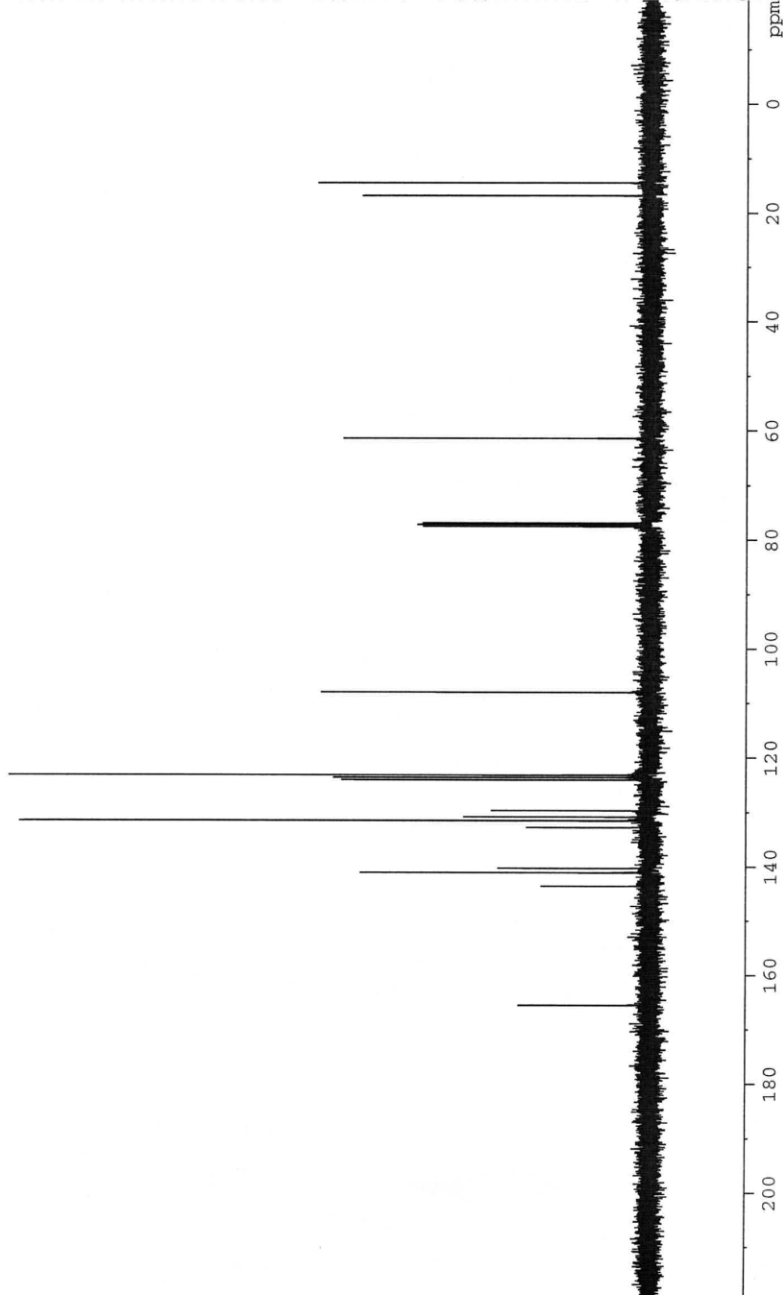

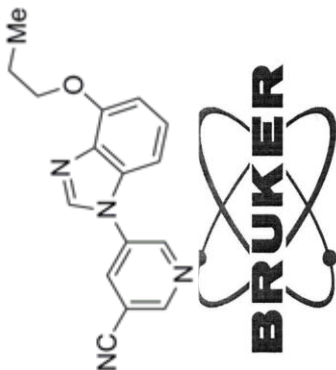

Current Data Parameters  
 NAME SU2-219  
 EXPNO 1  
 PROCNO 1

F2 - Acquisition Parameters  
 Date\_ 20110921  
 Time 12.13  
 INSTRUM spect  
 PROBHD 5 mm QNP 1H/13  
 PULPROG zg30  
 TD 65536  
 SOLVENT CDCl3  
 NS 8  
 DS 2  
 SWH 8278.146 Hz  
 FIDRES 0.126314 Hz  
 AQ 3.9584243 sec  
 RG 1625.5  
 DW 60.400 usec  
 DE 6.00 usec  
 TE 683.2 K  
 D1 1.0000000 sec  
 TD0 1

===== CHANNEL f1 =====  
 NUC1 1H  
 P1 14.00 usec  
 PL1 0.00 dB  
 SFO1 400.1324710 MHz  
 F2 - Processing parameters  
 SI 65536  
 SF 400.1300099 MHz  
 WDW no  
 SSB 0  
 LB 0.00 Hz  
 GB 0  
 PC 1.00

1.952  
1.934  
1.916  
1.898  
1.881  
1.863  
1.069  
1.050  
1.031

4.162  
4.145  
4.128

9.024  
9.024  
9.018  
9.017  
9.017  
8.894  
8.893  
8.889  
8.888  
8.151  
8.147  
8.145  
8.140  
8.007  
7.273  
7.253  
7.233  
7.233  
7.233  
7.042  
7.040  
7.022  
7.020  
6.771  
6.769  
6.751  
6.749

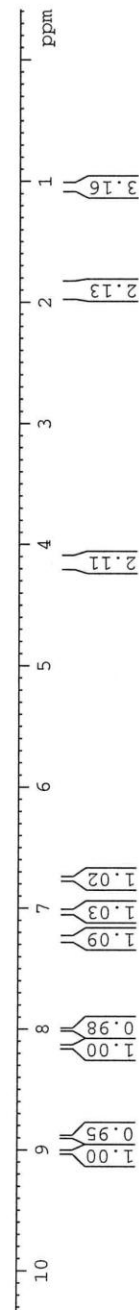

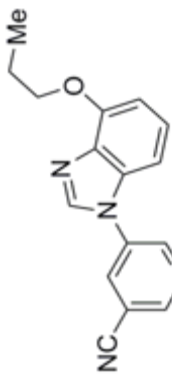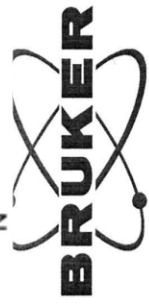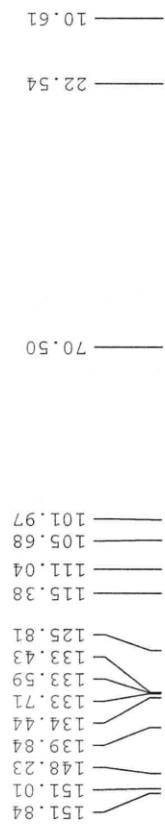

Current Data Parameters  
NAME SU2-219C  
EXPNO 1  
PROCNO 1

F2 - Acquisition Parameters  
Date\_ 20110921  
Time 12.21  
INSTRUM spect  
PROBHD 5 mm QNP 1H/13  
PULPROG zgpg30  
TD 65536  
SOLVENT CDCl3  
NS 128  
DS 4  
SWH 23980.814 Hz  
FIDRES 0.365918 Hz  
AQ 1.3664756 sec  
RG 1625.5  
DW 20.850 usec  
DE 6.00 usec  
TE 300.0 K  
D1 2.00000000 sec  
d11 0.03000000 sec  
DELTA 1.89999998 sec  
TD0 1

===== CHANNEL f1 =====  
NUC1 13C  
P1 9.38 usec  
PL1 0.00 dB  
SFO1 100.6228298 MHz

===== CHANNEL f2 =====  
CPDPRG2 waltz16  
NUC2 1H  
PCPD2 90.00 usec  
PL2 0.00 dB  
PL12 16.10 dB  
PL13 19.00 dB  
SFO2 400.1316005 MHz

F2 - Processing parameters  
SI 32768  
SF 100.6127639 MHz  
WDW no  
SSB 0  
LB 0  
GB 0  
PC 1.40

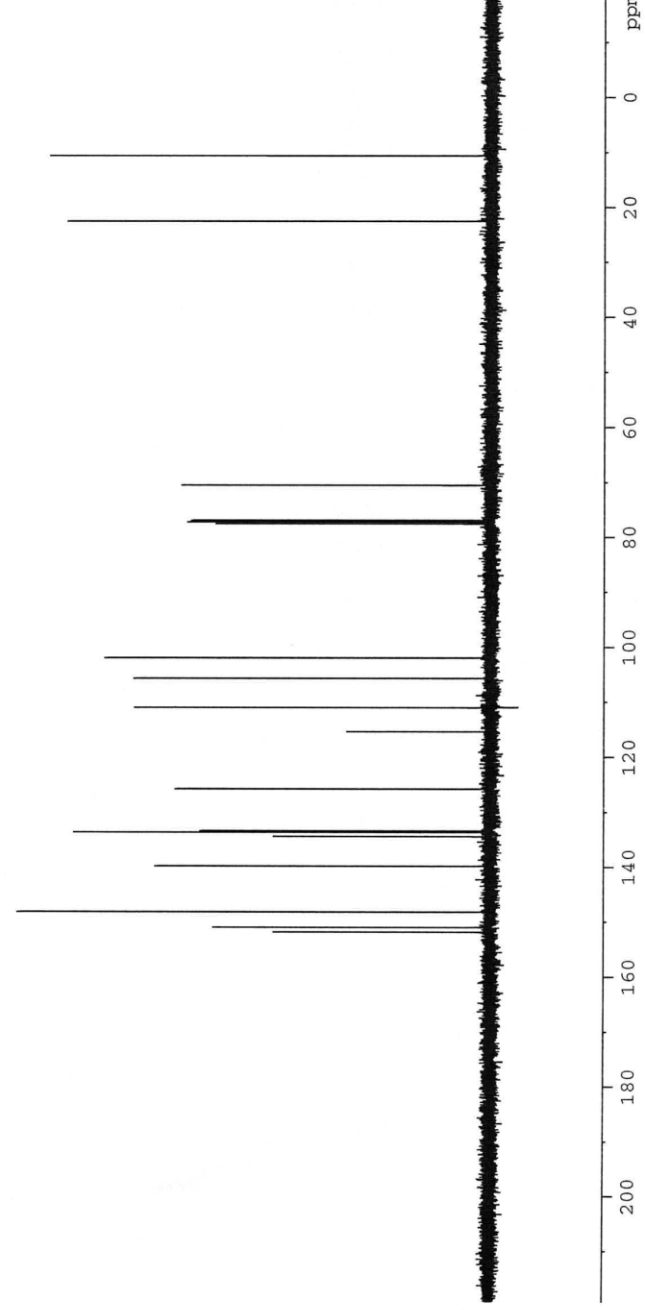

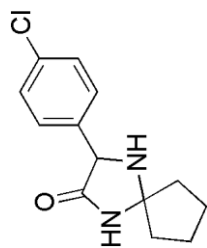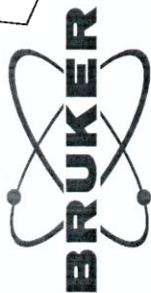

Current Data Parameters  
 NAME SUI-236  
 EXPNO 1  
 PROCNO 1

F2 - Acquisition Parameters  
 Date\_ 20110124  
 Time 9.24  
 INSTRUM spect  
 PROBD 5 mm QNP 1H/13  
 PULPROG zg30  
 TD 65536  
 SOLVENT DMSO  
 NS 16  
 DS 2  
 SWH 8278.146 Hz  
 FIDRES 0.126314 Hz  
 AQ 3.9584243 sec  
 RG 128  
 DW 60.400 usec  
 DE 6.00 usec  
 TE 294.2 K  
 D1 1.00000000 sec  
 TD0 1

===== CHANNEL f1 =====  
 NUC1 1H  
 P1 14.00 usec  
 PL1 0.00 dB  
 SFO1 400.1324710 MHz

F2 - Processing parameters  
 SI 65536  
 SF 400.1300035 MHz  
 WDW no  
 SSB 0  
 LB 0.00 Hz  
 GB 0  
 PC 1.00

1.791  
1.675  
1.659  
1.648

3.624  
3.602

4.551  
4.529

7.496  
7.475  
7.391  
7.370

8.554

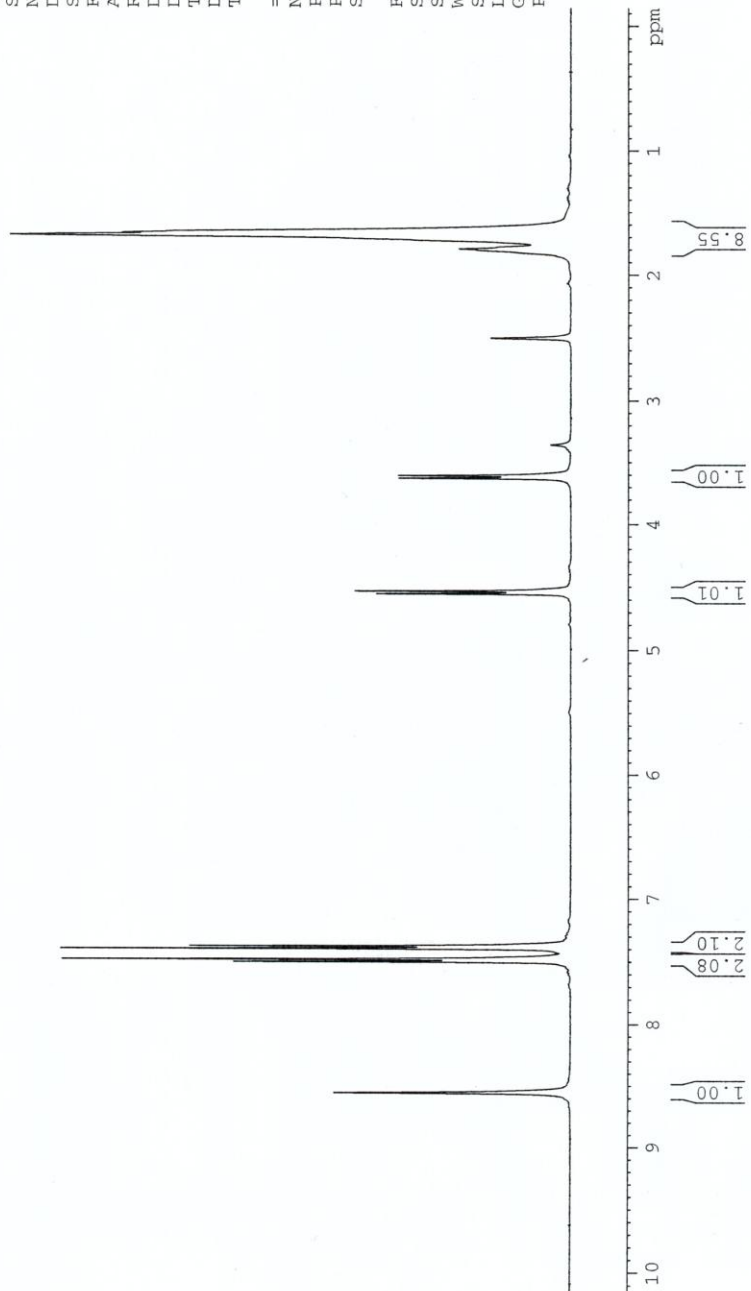

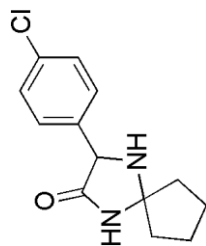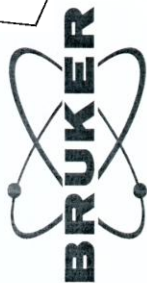

Current Data Parameters  
 NAME SU1-236  
 EXPNO 2  
 PROCNO 2

F2 - Acquisition Parameters  
 Date\_ 20110124  
 Time 10.56  
 INSTRUM spect  
 PROHD 5 mm QNP 1H/13  
 PULPROG zgpg30  
 TD 65536  
 SOLVENT DMSO  
 NS 256  
 DS 4  
 SWH 23980.814 Hz  
 FIDRES 0.365918 Hz  
 AQ 1.3664756 sec  
 RG 2580.3  
 DW 20.850 usec  
 DE 6.00 usec  
 TE 295.2 K  
 D1 2.00000000 sec  
 d11 0.03000000 sec  
 DELTA 1.89999998 sec  
 TD0 1

===== CHANNEL f1 =====  
 NUC1 13C  
 P1 9.38 usec  
 PL1 0.00 dB  
 SFO1 100.6228298 MHz  
 ===== CHANNEL f2 =====  
 CPDPRG2 waltz16  
 NUC2 1H  
 FCPD2 90.00 usec  
 PL2 0.00 dB  
 PL12 16.10 dB  
 PL13 19.00 dB  
 SFO2 400.1316005 MHz

F2 - Processing parameters  
 SI 32768  
 SF 100.6128170 MHz  
 WDW no  
 SSB 0  
 LB 0.00 Hz  
 GB 0  
 PC 1.40

22.55  
 22.39

61.02

81.59

139.37  
 131.54  
 129.01  
 127.80

173.44

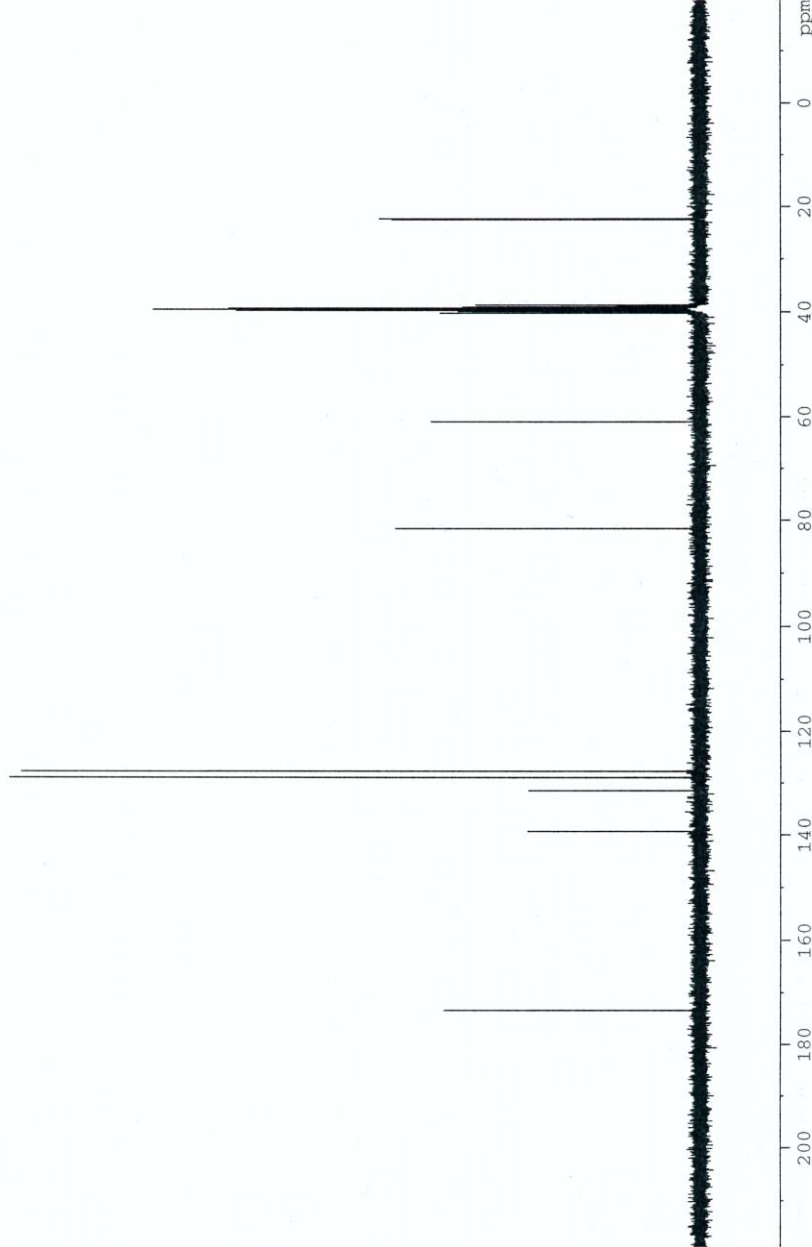

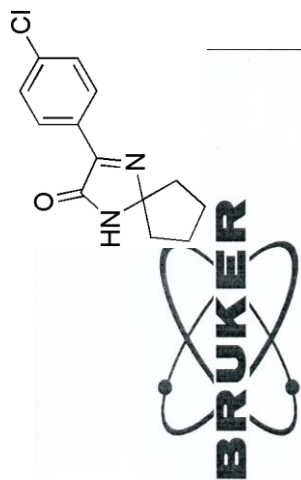

1.979  
1.911  
1.897  
1.884  
1.876  
1.863  
1.828  
1.823  
1.818  
1.809

8.347  
8.325  
7.567  
7.545

10.082

Current Data Parameters  
NAME SU1-241  
EXPNO 1  
PROCNO 1

F2 - Acquisition Parameters  
Date\_ 20110126  
Time 9.09  
INSTRUM spect  
PROBHD 5 mm QNP 1H/13  
PULPROG zg30  
TD 65536  
SOLVENT DMSO  
NS 16  
DS 2  
SWH 8278.146 Hz  
FIDRES 0.126314 Hz  
AQ 3.9584243 sec  
RG 161.3  
DW 60.400 usec  
DE 6.00 usec  
TE 295.2 K  
D1 1.00000000 sec  
TD0 1

==== CHANNEL f1 =====  
NUC1 1H  
P1 14.00 usec  
PL1 0.00 dB  
SFO1 400.1324710 MHz

F2 - Processing parameters  
SI 65536  
SF 400.1300030 MHz  
WDW no  
SSB 0  
LB 0.00 Hz  
GB 0  
PC 1.00

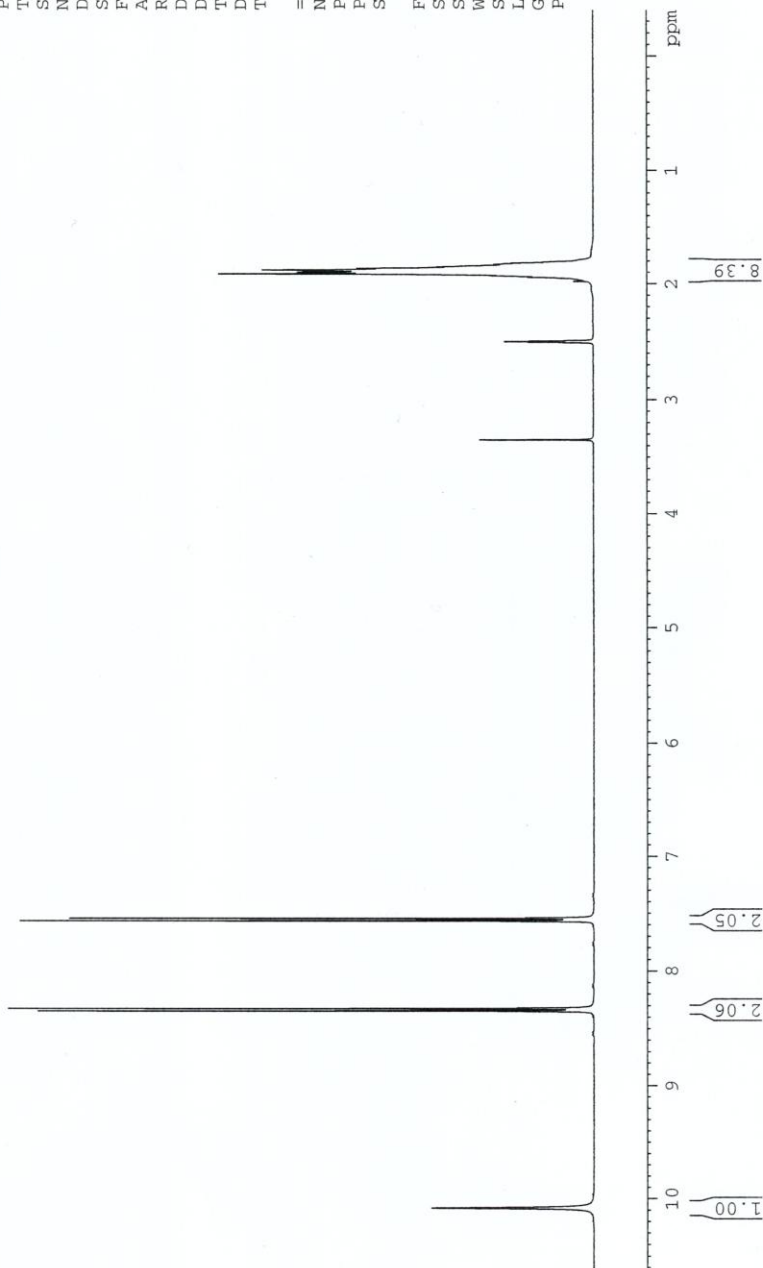

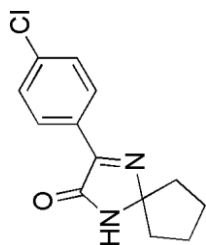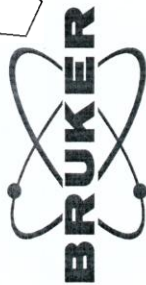

Current Data Parameters  
 NAME SU1-241C  
 EXPNO 1  
 PROCNO 1

F2 - Acquisition Parameters  
 Date\_ 20110126  
 Time 9.25  
 INSTRUM spect  
 PROBHD 5 mm QNP 1H/13  
 PULPROG zgpg30  
 TD 65536  
 SOLVENT DMSO  
 NS 256  
 DS 4  
 SWH 23980.814 Hz  
 FIDRES 0.365918 Hz  
 AQ 1.3664756 sec  
 RG 4597.6  
 DW 20.850 usec  
 DE 6.00 usec  
 TE 296.2 K  
 D1 2.00000000 sec  
 d11 0.03000000 sec  
 DELTA 1.89999998 sec  
 TD0 1

===== CHANNEL f1 =====  
 NUC1 13C  
 P1 9.38 usec  
 PL1 0.00 dB  
 SFO1 100.6228298 MHz

===== CHANNEL f2 =====  
 CPDPRG2 waltz16  
 NUC2 1H  
 PCPD2 90.00 usec  
 PL2 0.00 dB  
 PL12 16.10 dB  
 PL13 19.00 dB  
 SFO2 400.1316005 MHz

F2 - Processing parameters  
 SI 32768  
 SF 100.6128175 MHz  
 WDW no  
 SSB 0  
 LB 0.00 Hz  
 GB 0  
 PC 1.40

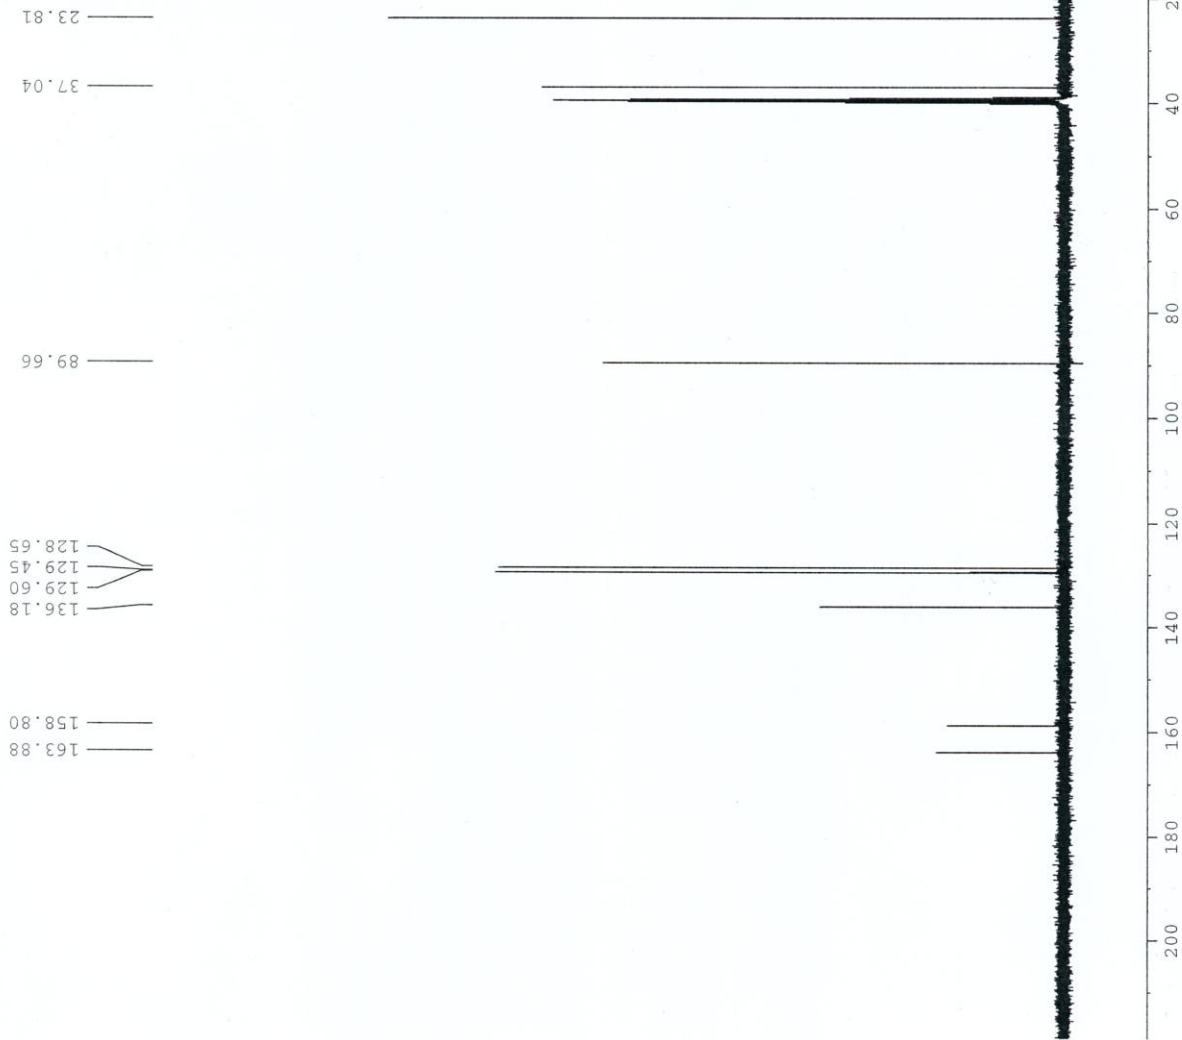

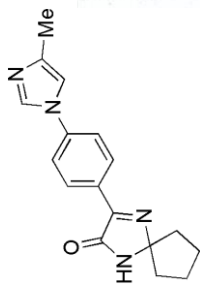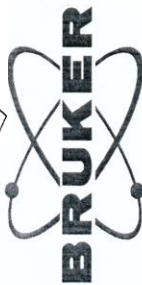

Current Data Parameters  
 NAME SU1-257-2  
 EXPNO 1  
 PROCNO 1

F2 - Acquisition Parameters  
 Date\_ 20110208  
 Time 9.17  
 INSTRUM spect  
 PROHD 5 mm QNP 1H/13  
 PULPROG zg30  
 TD 65536  
 SOLVENT DMSO  
 NS 16  
 DS 2  
 SWH 8278.146 Hz  
 FIDRES 0.126314 Hz  
 AQ 3.9584243 sec  
 RG 128  
 DW 60.400 usec  
 DE 6.00 usec  
 TE 295.2 K  
 D1 1.00000000 sec  
 TD0 1

===== CHANNEL f1 =====  
 NUC1 1H  
 P1 14.00 usec  
 PL1 0.00 dB  
 SF01 400.1324710 MHz

F2 - Processing parameters  
 SI 65536  
 SF 400.1300031 MHz  
 WDW no  
 SSB 0  
 LB 0.00 Hz  
 GB 0  
 PC 1.00

2.169  
1.977  
1.923  
1.909  
1.902  
1.892  
1.887  
1.826

8.432  
8.410  
8.260  
7.752  
7.730  
7.525

10.088

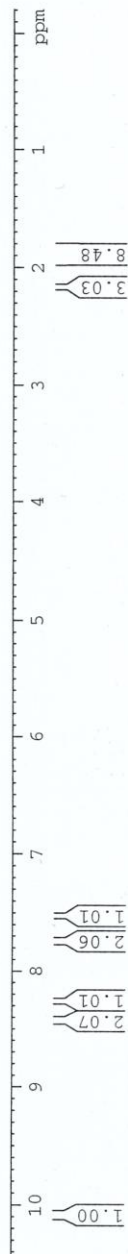

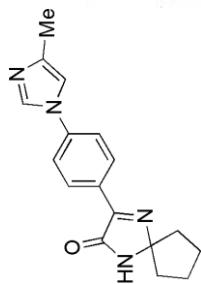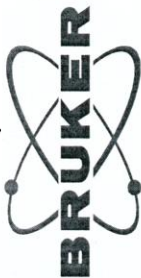

Current Data Parameters  
 NAME SU1-257-2C  
 EXPNO 1  
 PROCNO 1

F2 - Acquisition Parameters  
 Date\_ 20110208  
 Time 9.32  
 INSTRUM spect  
 PROBHD 5 mm QNP 1H/13  
 PULPROG zgpg30  
 TD 65536  
 SOLVENT DMSO  
 NS 256  
 DS 4  
 SWH 23980.814 Hz  
 FIDRES 0.365918 Hz  
 AQ 1.3664756 sec  
 RG 1625.5  
 DW 20.850 usec  
 DE 6.00 usec  
 TE 296.2 K  
 D1 2.00000000 sec  
 d11 0.03000000 sec  
 DELTA 1.89999998 sec  
 TDO 1

===== CHANNEL f1 =====  
 NUC1 13C  
 P1 9.38 usec  
 PL1 0.00 dB  
 SFO1 100.6228298 MHz

===== CHANNEL f2 =====  
 CPDPRG2 waltz16  
 NUC2 1H  
 FCPD2 90.00 usec  
 PL2 0.00 dB  
 PL12 16.10 dB  
 PL13 19.00 dB  
 SFO2 400.1316005 MHz

F2 - Processing parameters  
 SI 32768  
 SF 100.6128158 MHz  
 WDW no  
 SSB 0  
 LB 0.00 Hz  
 GB 0  
 PC 1.40

13.58  
 23.86  
 37.13  
 89.62  
 113.78  
 119.28  
 128.50  
 129.44  
 134.72  
 138.84  
 138.92  
 158.77  
 164.11

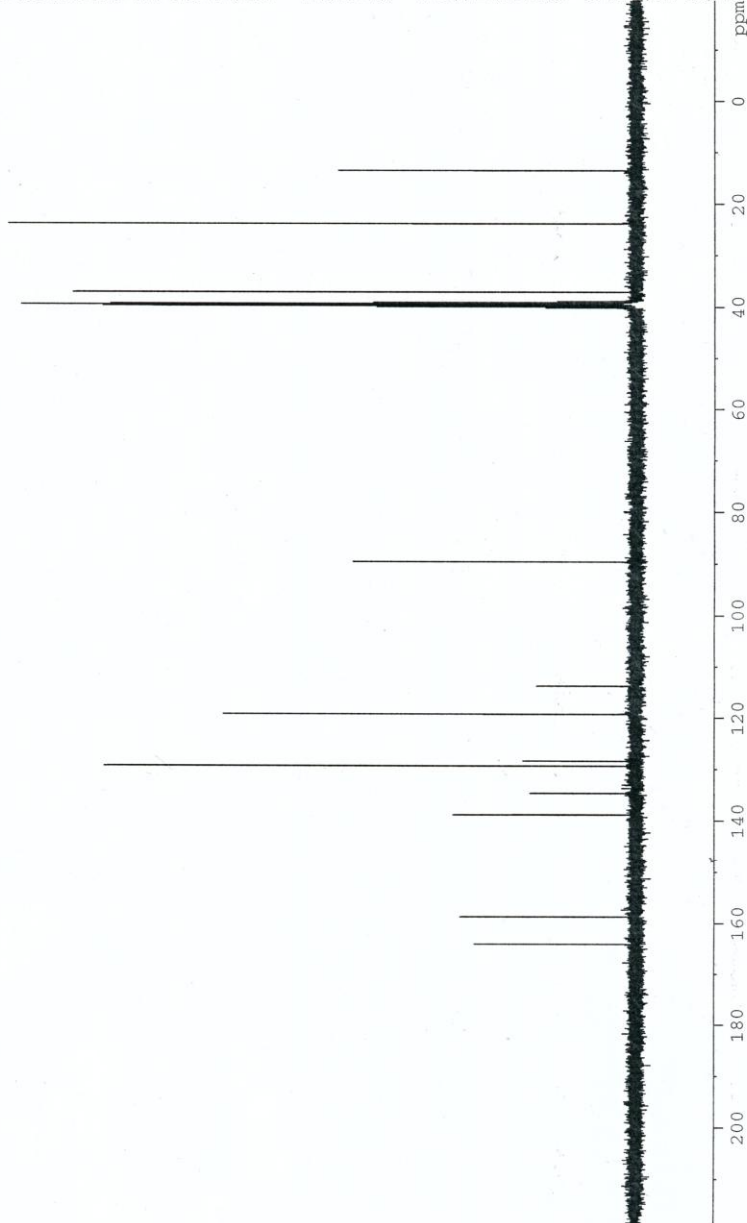

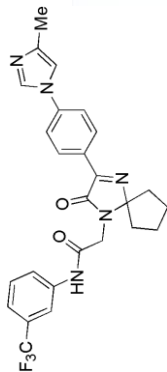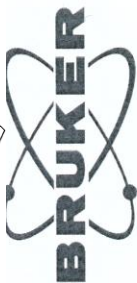

Current Data Parameters  
NAME SUI-271  
EXPNO 2  
PROCNO 2

F2 - Acquisition Parameters  
Date\_ 20110218  
Time 9.39  
INSTRUM spect  
PROBHD 5 mm QNP 1H/13  
PULPROG zg30  
TD 65536  
SOLVENT DMSO  
NS 16  
DS 2  
SWH 8278.146 Hz  
FIDRES 0.126314 Hz  
AQ 3.9584243 sec  
RG 161.3  
DW 60.400 usec  
DE 6.00 usec  
TE 295.2 K  
D1 1.00000000 sec  
TD0 1

===== CHANNEL f1 =====  
NUC1 1H  
P1 14.00 usec  
PL1 0.00 dB  
SFO1 400.1324710 MHz

F2 - Processing parameters  
SI 65536  
SF 400.1300031 MHz  
WDW no  
SSB 0  
LB 0.00 Hz  
GB 0  
PC 1.00

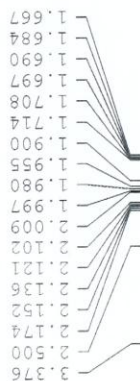

4.379

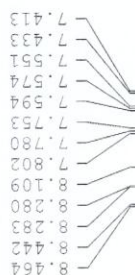

10.604

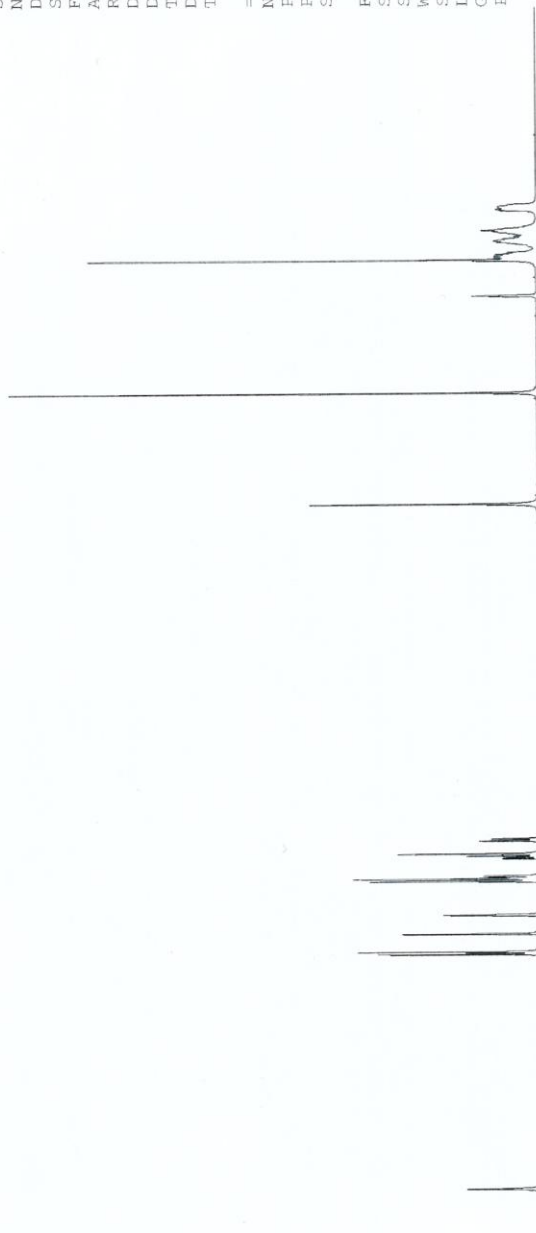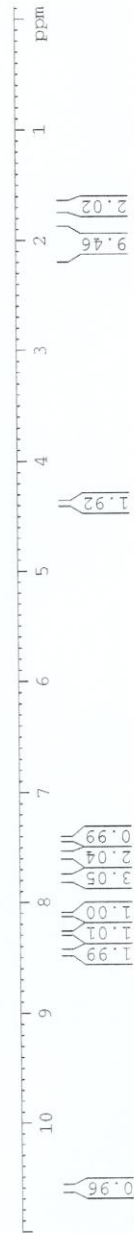

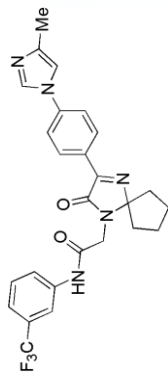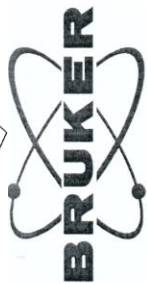

Current Data Parameters  
 NAME SUI-271C  
 EXPNO 2  
 PROCNO 2

F2 - Acquisition Parameters  
 Date\_ 20110218  
 Time 9.55  
 INSTRUM spect  
 PROBHD 5 mm QNP 1H/13  
 PULPROG zgpg30  
 TD 65536  
 SOLVENT DMSO  
 NS 256  
 DS 4  
 SWH 23980.814 Hz  
 FIDRES 0.365918 Hz  
 AQ 1.3664756 sec  
 RG 1625.5  
 DW 20.850 usec  
 DE 6.00 usec  
 TE 296.2 K  
 D1 2.00000000 sec  
 d11 0.03000000 sec  
 DELTA 1.89999998 sec  
 TD0 1

===== CHANNEL f1 =====  
 NUC1 13C  
 P1 9.38 usec  
 PL1 0.00 dB  
 SFO1 100.6228298 MHz

===== CHANNEL f2 =====  
 CPDPRG2 waltz16  
 NUC2 1H  
 PCPD2 90.00 usec  
 PL2 0.00 dB  
 PL12 16.10 dB  
 PL13 19.00 dB  
 SFO2 400.1316005 MHz

F2 - Processing parameters  
 SI 32768  
 SF 100.6128149 MHz  
 WDW no  
 SSB 0  
 LB 0.00 Hz  
 GB 0  
 PC 1.40

43.37  
 34.37  
 23.61  
 13.58

166.31  
 162.61  
 157.48  
 139.44  
 139.14  
 138.89  
 134.77  
 130.12  
 129.71  
 128.27  
 128.15  
 125.42  
 122.75  
 122.71  
 120.01  
 119.92  
 119.88  
 119.84  
 119.79  
 119.40  
 115.27  
 115.24  
 115.21  
 115.18  
 113.78  
 93.25

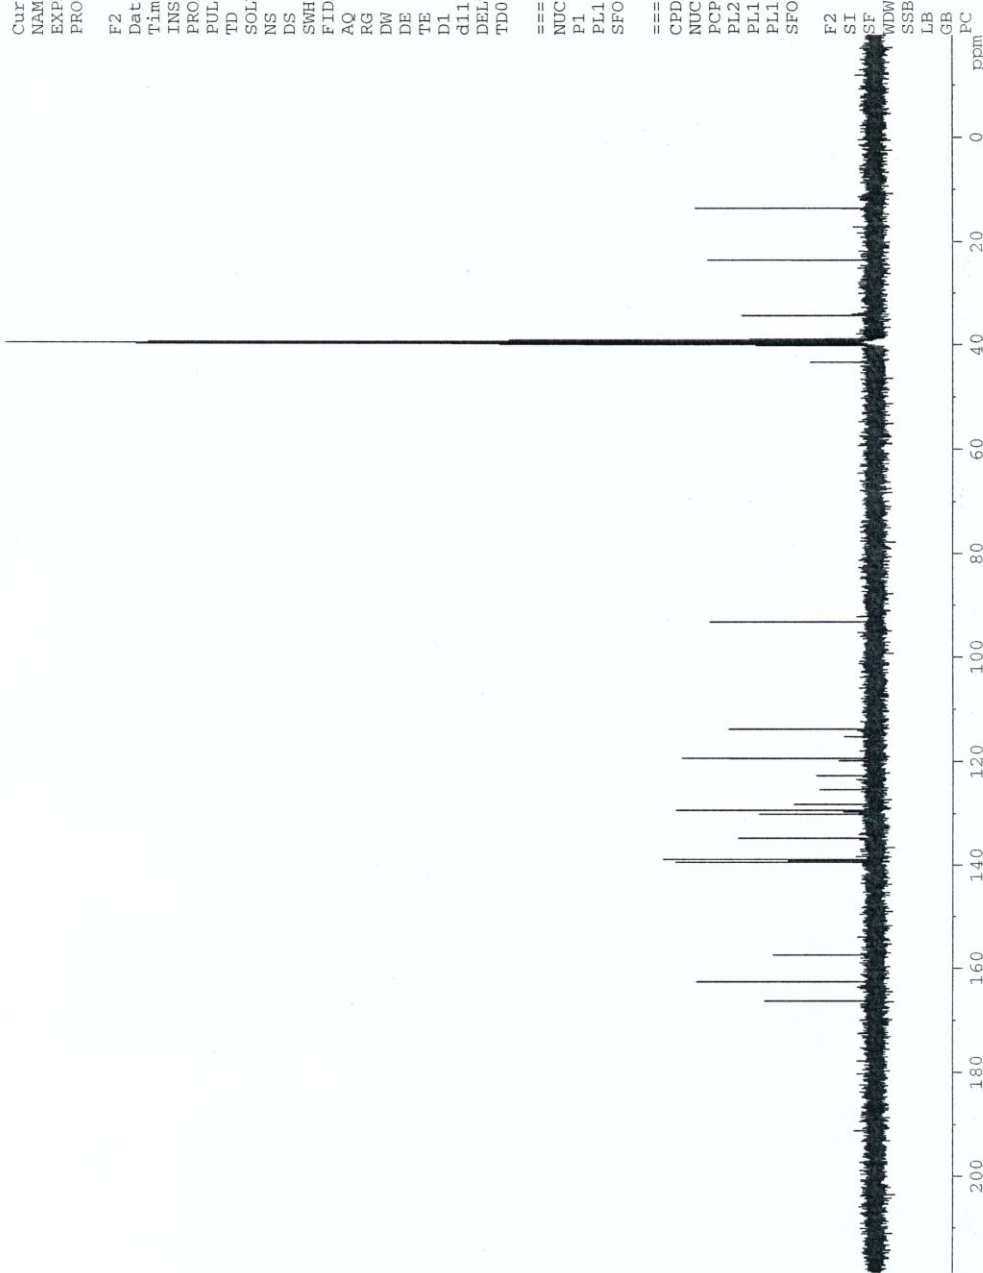

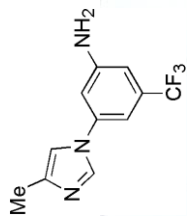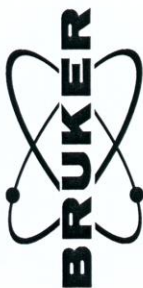

SU1-31-7

2.152

5.908

6.839

6.956

6.984

7.357

8.087

8.090

Current Data Parameters  
 NAME SU1-31-7  
 EXPNO 2  
 PROCNO 2

F2 - Acquisition Parameters  
 Date\_ 20100909  
 Time 10.31  
 INSTRUM spect  
 PROBHD 5 mm QNP 1H/13  
 PULPROG zg30  
 TD 65536  
 SOLVENT DMSO  
 NS 32  
 DS 2  
 SWH 8278.146 Hz  
 FIDRES 0.126314 Hz  
 AQ 3.9584243 sec  
 RG 101.6  
 DW 60.400 usec  
 DE 6.00 usec  
 TE 295.2 K  
 D1 1.00000000 sec  
 TD0 1

===== CHANNEL f1 =====  
 NUC1 1H  
 P1 14.00 usec  
 PL1 0.00 dB  
 SFO1 400.1324710 MHz

F2 - Processing parameters  
 SI 65536  
 SF 400.1300032 MHz  
 WDW no  
 SSB 0  
 LB 0.00 Hz  
 GB 0  
 PC 1.00

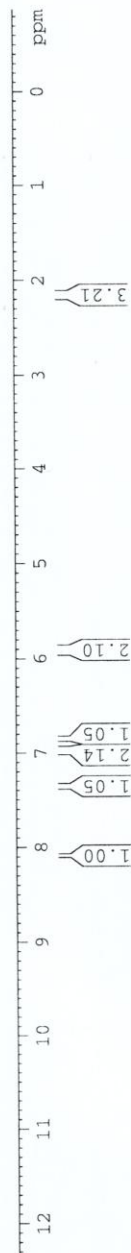

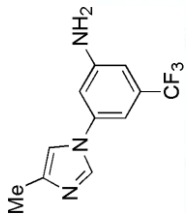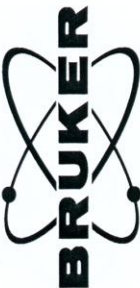

Current Data Parameters  
 NAME SU1-31-7C  
 EXPNO 2  
 PROCNO 2

F2 - Acquisition Parameters  
 Date\_ 20100909  
 Time 10.47  
 INSTRUM spect  
 PROBD 5 mm QNP 1H/13  
 PULPROG zgpg30  
 TD 65536  
 SOLVENT DMSO  
 NS 256  
 DS 4  
 SWH 23980.814 Hz  
 FIDRES 0.365918 Hz  
 AQ 1.3664756 sec  
 RG 6502  
 DW 20.850 usec  
 DE 6.00 usec  
 TE 296.2 K  
 D1 2.00000000 sec  
 d11 0.03000000 sec  
 DELTA 1.89999998 sec  
 TD0 1

===== CHANNEL f1 =====  
 NUC1 13C  
 P1 9.38 usec  
 PL1 0.00 dB  
 SFO1 100.6228298 MHz

===== CHANNEL f2 =====  
 CPDPRG2 waltz16  
 NUC2 1H  
 PCPD2 90.00 usec  
 PL2 0.00 dB  
 PL12 16.10 dB  
 PL13 19.00 dB  
 SFO2 400.1316005 MHz

F2 - Processing parameters  
 SI 32768  
 SF 100.6128090 MHz  
 WDW no  
 SSB 0  
 LB 0.00 Hz  
 GB 0  
 PC 1.40

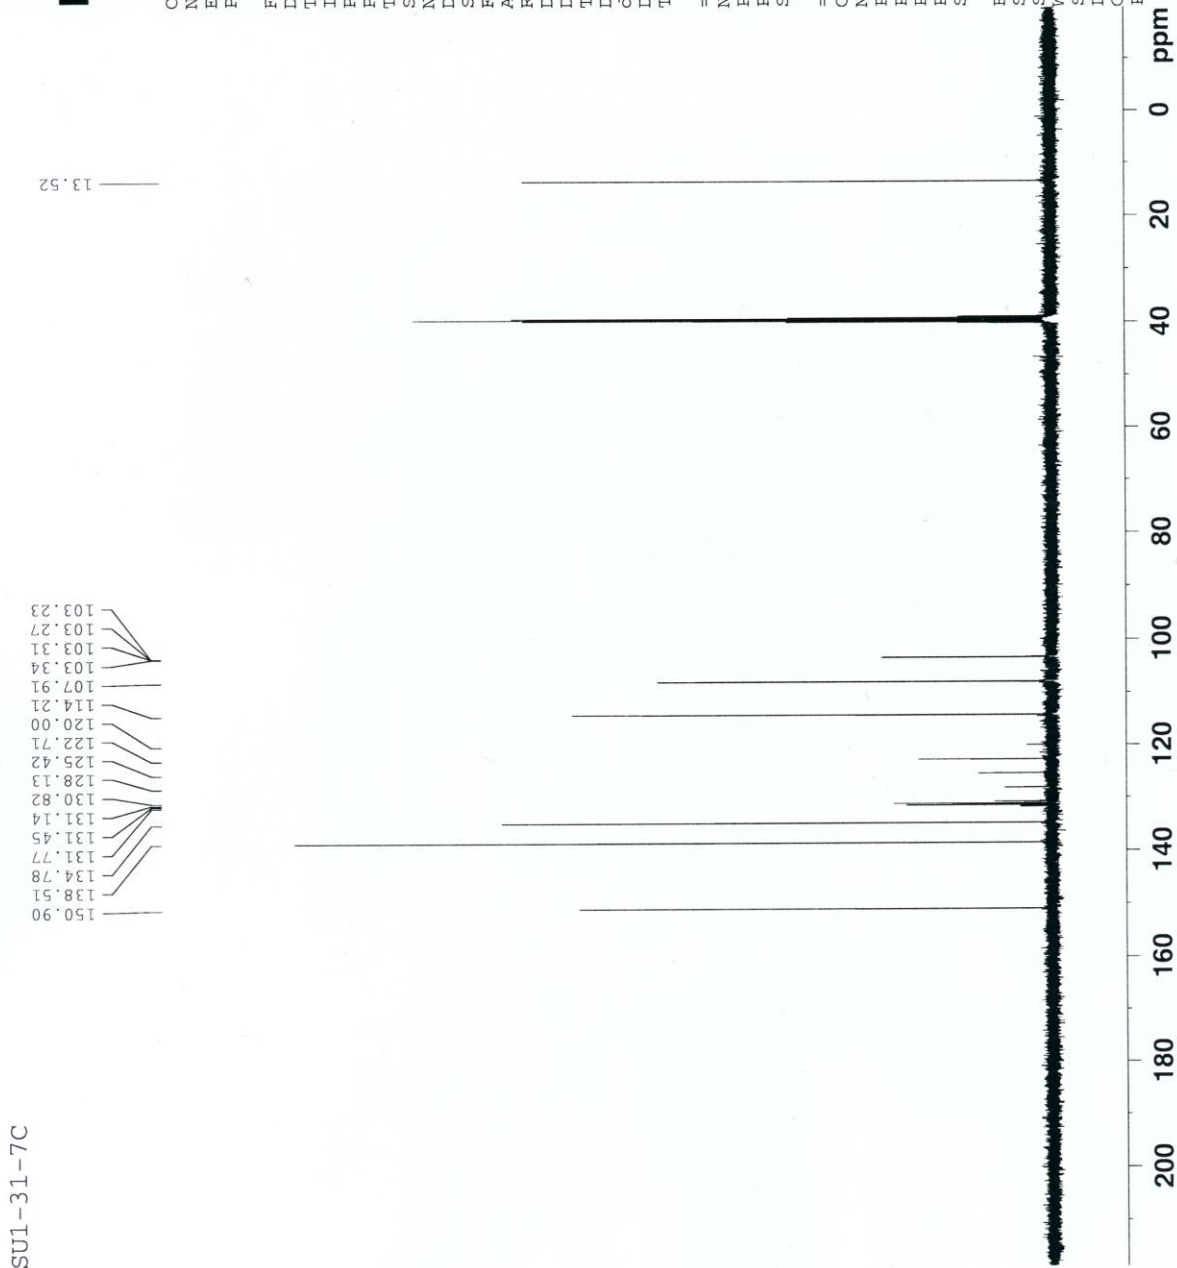

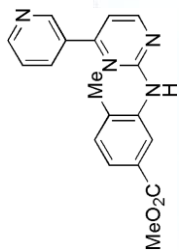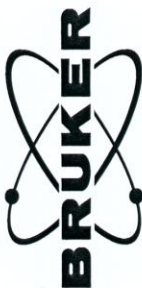

SU1-113

9.262  
9.258  
8.948  
8.684  
8.680  
8.672  
8.668  
8.473  
8.460  
8.398  
8.393  
8.389  
8.378  
8.373  
8.369  
7.687  
7.683  
7.668  
7.664  
7.399  
7.386  
7.379  
7.367  
7.249  
7.229  
7.169  
7.156

3.911  
2.356

Current Data Parameters  
NAME SU1-113  
EXPNO 3  
PROCNO 3

F2 - Acquisition Parameters  
Date\_ 20100818  
Time 9.37  
INSTRUM spect  
PROBHD 5 mm QNP 1H/13  
PULPROG zg30  
TD 65536  
SOLVENT CDCl3  
NS 32  
DS 2  
SWH 8278.146 Hz  
FIDRES 0.126314 Hz  
AQ 3.9584243 sec  
RG 143.7  
DW 60.400 usec  
DE 6.00 usec  
TE 295.2 K  
D1 1.00000000 sec  
TDO 1

==== CHANNEL f1 =====  
NUC1 1H  
P1 14.00 usec  
PL1 0.00 dB  
SFO1 400.1324710 MHz

F2 - Processing parameters  
SI 65536  
SF 400.1300179 MHz  
WDW no  
SSB 0  
LB 0.00 Hz  
GB 0  
PC 1.00

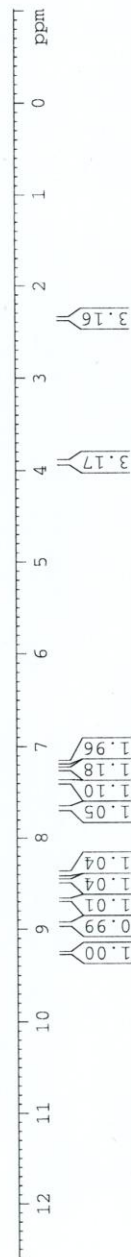

SU1-113C

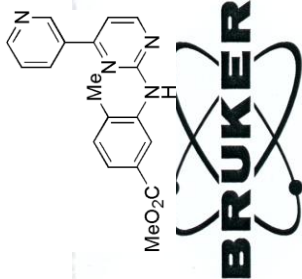

Current Data Parameters  
 NAME SU1-113C  
 EXPNO 1  
 PROCNO 1

F2 - Acquisition Parameters  
 Date\_ 20100818  
 Time 9.10  
 INSTRUM spect  
 PROBHD 5 mm QNP 1H/13  
 PULPROG zgpg30  
 TD 65536  
 SOLVENT CDCl<sub>3</sub>  
 NS 128  
 DS 4  
 SWH 23980.814 Hz  
 FIDRES 0.365918 Hz  
 AQ 1.3664756 sec  
 RG 2580.3  
 DW 20.850 usec  
 DE 6.00 usec  
 TE 295.2 K  
 D1 2.00000000 sec  
 d11 0.03000000 sec  
 DELTA 1.89999998 sec  
 TD0 1

===== CHANNEL f1 =====  
 NUC1 13C  
 P1 9.38 usec  
 PL1 0.00 dB  
 SFO1 100.6228298 MHz

===== CHANNEL f2 =====  
 CPDPRG2 waltz16  
 NUC2 1H  
 PCPD2 90.00 usec  
 PL2 0.00 dB  
 PL12 16.10 dB  
 PL13 19.00 dB  
 SFO2 400.1316005 MHz

F2 - Processing parameters  
 SI 32768  
 SF 100.6127578 MHz  
 WDW 0  
 SSB 0  
 LB 0  
 GB 0  
 PC 1.40

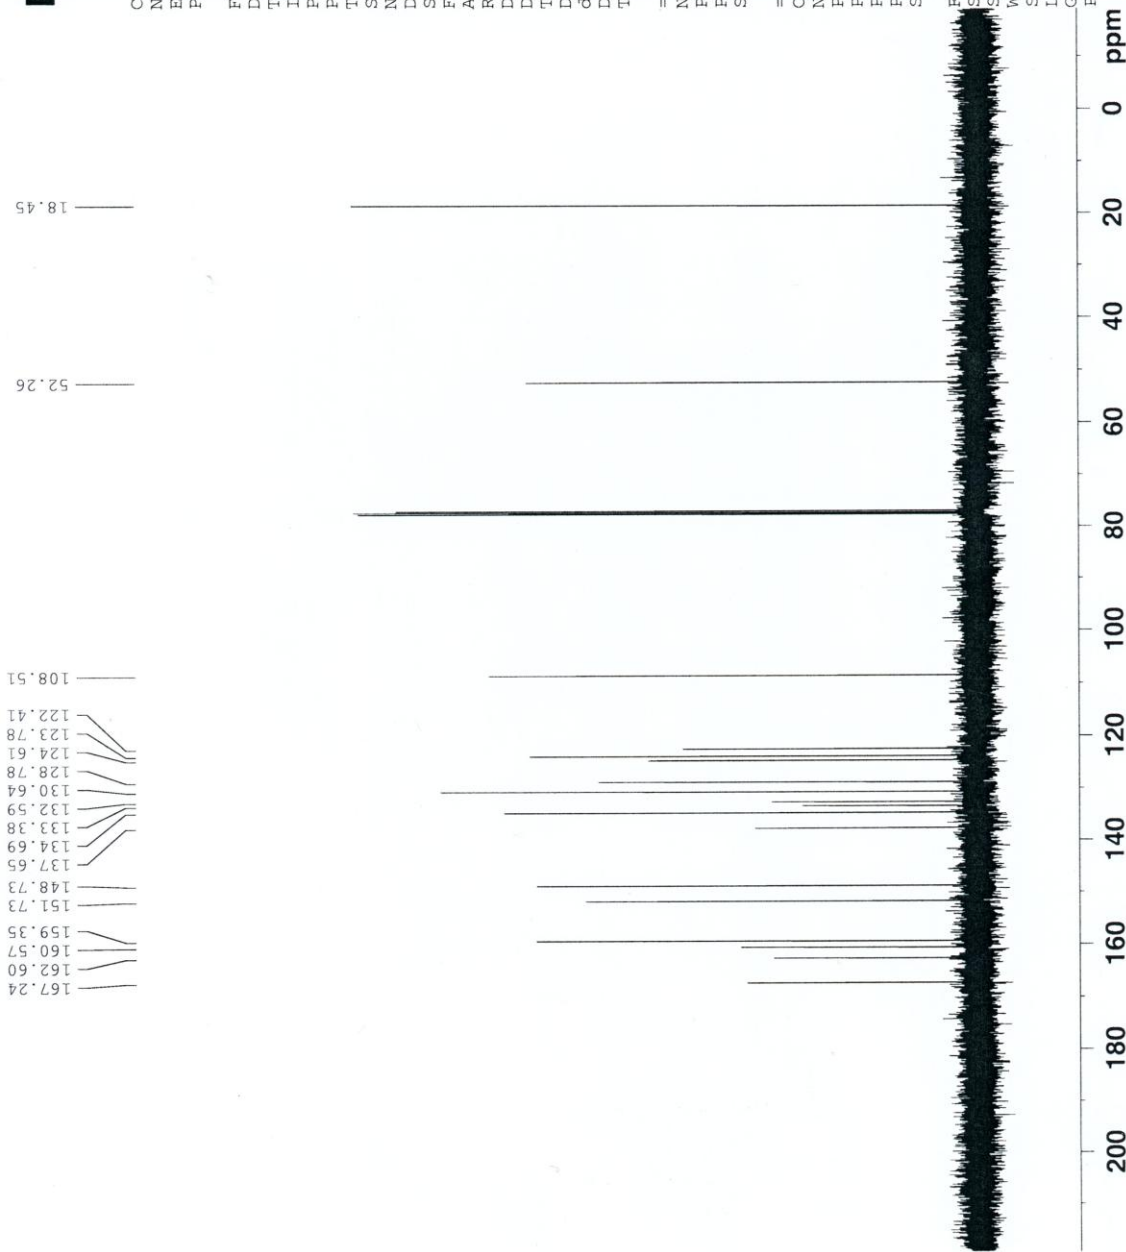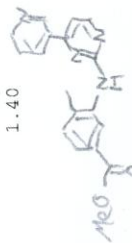

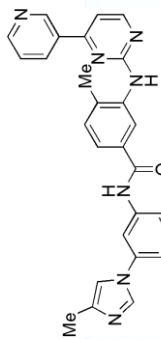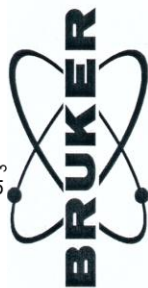

Current Data Parameters  
 NAME SU1-117  
 EXPNO 1  
 PROCNO 1

F2 - Acquisition Parameters  
 Date\_ 20100822  
 Time 13.20  
 INSTRUM spect  
 PROBHD 5 mm QNP 1H/13  
 PULPROG zg30  
 TD 65536  
 SOLVENT DMSO  
 NS 16  
 DS 2  
 SWH 8278.146 Hz  
 FIDRES 0.126314 Hz  
 AQ 3.9584243 sec  
 RG 143.7  
 DW 60.400 usec  
 DE 6.00 usec  
 TE 295.2 K  
 D1 1.00000000 sec  
 TD0 1

==== CHANNEL f1 =====  
 NUC1 1H  
 P1 14.00 usec  
 PL1 0.00 dB  
 SFO1 400.1324710 MHz

F2 - Processing parameters  
 SI 65536  
 SF 400.1300037 MHz  
 WDW no  
 SSB 0  
 LB 0.00 Hz  
 GB 0  
 PC 1.00

7.409  
7.428  
7.463  
7.494  
7.623  
7.781  
7.800  
8.267  
8.341  
8.419  
8.439  
8.527  
8.540  
8.666  
8.674  
9.169  
9.277

10.684

SU1-117

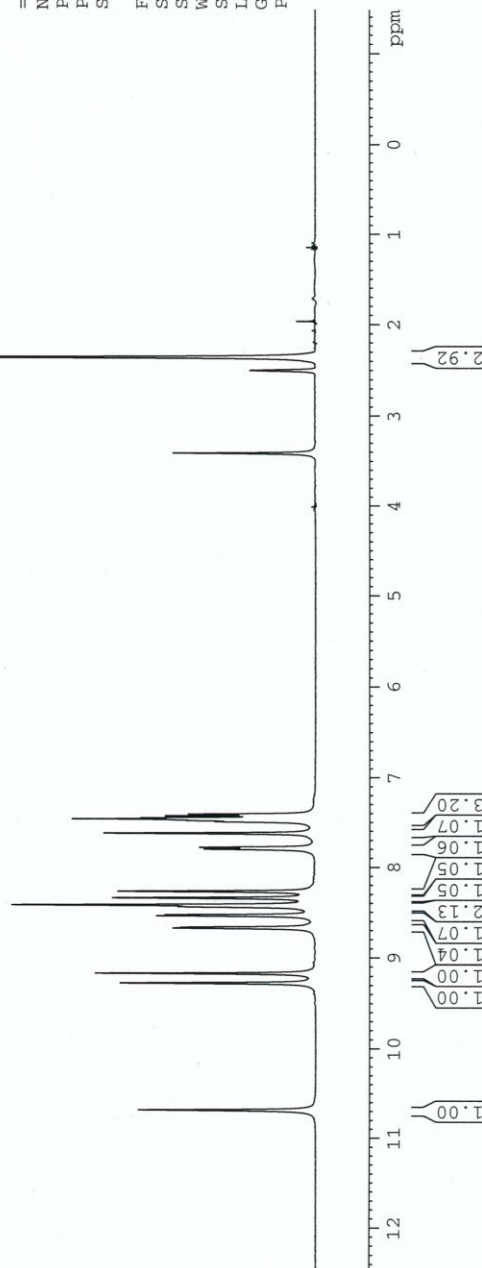

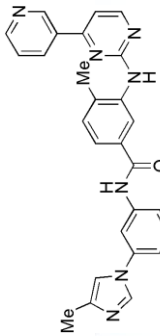

SU1-117C2

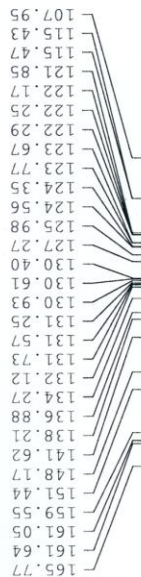

18.28

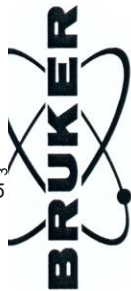

Current Data Parameters  
NAME SU1-117C2  
EXPNO 1  
PROCNO 1

F2 - Acquisition Parameters  
Date\_ 20100822  
Time 14.37  
INSTRUM spect  
PROBHD 5 mm QNP 1H/13  
PULPROG zgpg30  
TD 65536  
SOLVENT DMSO  
NS 1310  
DS 4  
SWH 23980.814 Hz  
FIDRES 0.365918 Hz  
AQ 1.3664756 sec  
RG 3649.1  
DE 20.850 usec  
TE 296.2 K  
D1 2.00000000 sec  
d11 0.03000000 sec  
DELTA 1.89999998 sec  
TD0 1

===== CHANNEL f1 =====  
NUC1 13C  
P1 9.38 usec  
PL1 0.00 dB  
SFO1 100.6228298 MHz

===== CHANNEL f2 =====  
CPDPRG2 waltz16  
NUC2 1H  
PCPD2 90.00 usec  
PL2 0.00 dB  
PL12 16.10 dB  
PL13 19.00 dB  
SFO2 400.1316005 MHz

F2 - Processing parameters  
SI 32768  
SF 100.6128128 MHz  
WDW no  
SSB 0  
LB 0.00 Hz  
GB 0  
PC 1.40

200 180 160 140 120 100 80 60 40 20 0 ppm

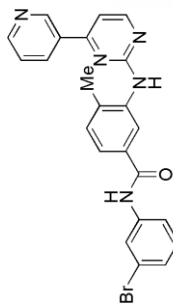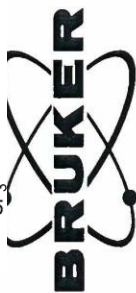

SU1-114

10.648  
9.286  
9.185  
8.673  
8.664  
8.548  
8.535  
8.447  
8.427  
8.357  
8.321  
8.210  
8.177  
7.788  
7.769  
7.714  
7.505  
7.492  
7.473  
7.460  
7.451  
7.431

2.361  
2.172

Current Data Parameters  
NAME SU1-114  
EXPNO 1  
PROCNO 1

F2 - Acquisition Parameters  
Date\_ 20100820  
Time 8.45  
INSTRUM spect  
PROBHD 5 mm QNP 1H/13  
PULPROG zg30  
TD 65536  
SOLVENT DMSO  
NS 64  
DS 2  
SWH 8278.146 Hz  
FIDRES 0.126314 Hz  
AQ 3.9584243 sec  
RG 143.7  
DW 60.400 usec  
DE 6.00 usec  
TE 295.2 K  
D1 1.00000000 sec  
TD0 1

==== CHANNEL f1 =====  
NUC1 1H  
P1 14.00 usec  
PL1 0.00 dB  
SFO1 400.1324710 MHz

F2 - Processing parameters  
SI 65536  
SF 400.1300036 MHz  
WDW nc  
SSB 0  
LB 0.00 Hz  
GB 0  
PC 1.00

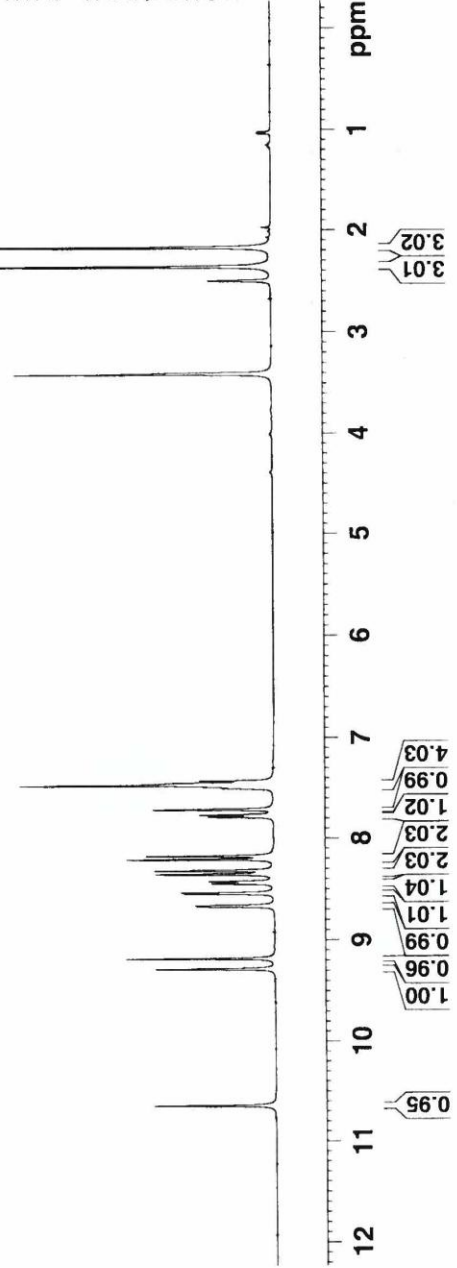

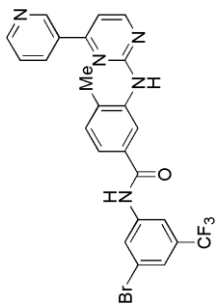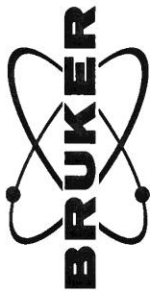

Current Data Parameters  
NAME SUI-114C  
EXPNO 1  
PROCNO 1

F2 - Acquisition Parameters  
Date\_ 20100820  
Time 10.15  
INSTRUM spect  
PROBHD 5 mm QNP 1H/13  
PULPROG zgpg30  
TD 65536  
SOLVENT DMSO  
NS 1054  
DS 4  
SWH 23980.814 Hz  
FIDRES 0.365918 Hz  
AQ 1.3664756 sec  
RG 3649.1  
DW 20.850 usec  
DE 6.00 usec  
TE 296.2 K  
D1 2.00000000 sec  
d11 0.03000000 sec  
DELTA 1.89999998 sec  
TD0 1

===== CHANNEL f1 =====  
NUC1 13C  
P1 9.38 usec  
PL1 0.00 dB  
SFO1 100.628298 MHz

===== CHANNEL f2 =====  
CPDPRG2 waltz16  
NUC2 1H  
PCPD2 90.00 usec  
PL2 0.00 dB  
PL12 16.10 dB  
PL13 19.00 dB  
SFO2 400.1316005 MHz

F2 - Processing parameters  
SI 32768  
SF 100.6128137 MHz  
WDW no  
SSB 0  
LB 0.00 Hz  
GB 0  
PC 1.40

SUI-114C

165.72  
161.65  
161.05  
159.57  
151.44  
148.17  
141.42  
138.92  
138.21  
137.91  
136.84  
134.97  
134.29  
132.12  
131.81  
131.00  
130.68  
130.45  
125.04  
124.27  
123.79  
123.57  
114.94  
114.21  
111.53  
107.98

18.26  
13.56

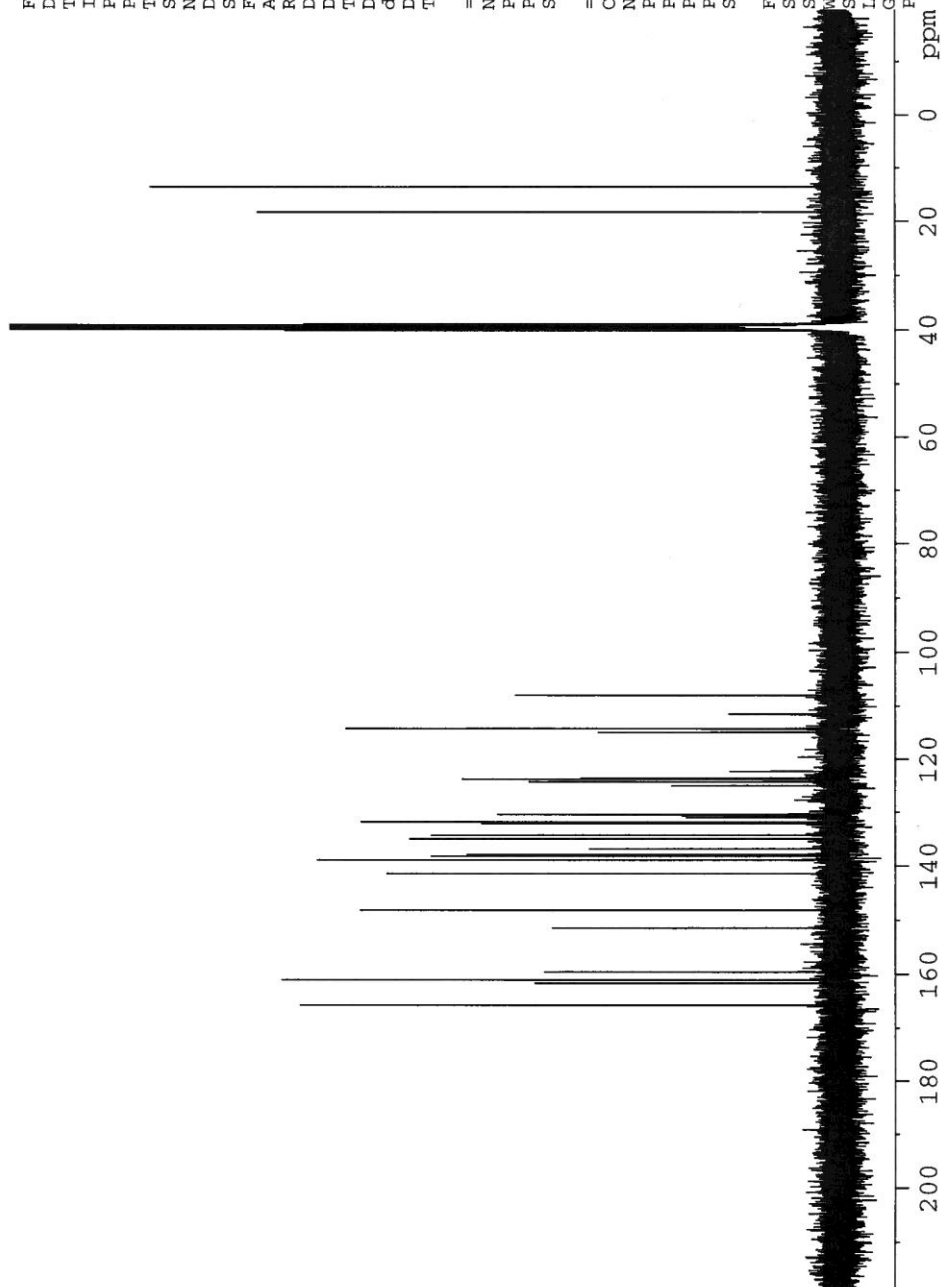

Supplement: NIHMS341879-supplement-1_si_001.pdf [file NIHMS341879-supplement-1_si_001.pdf]
